# Supplementary material for: Polypyrimidine Tract Binding Proteins are essential for B cell development
Source: bioRxiv or medRxiv preprint supplement (doi:10.1101/769141), 2019-11-12
Supplement: Supplementary file [file media-1.pdf]

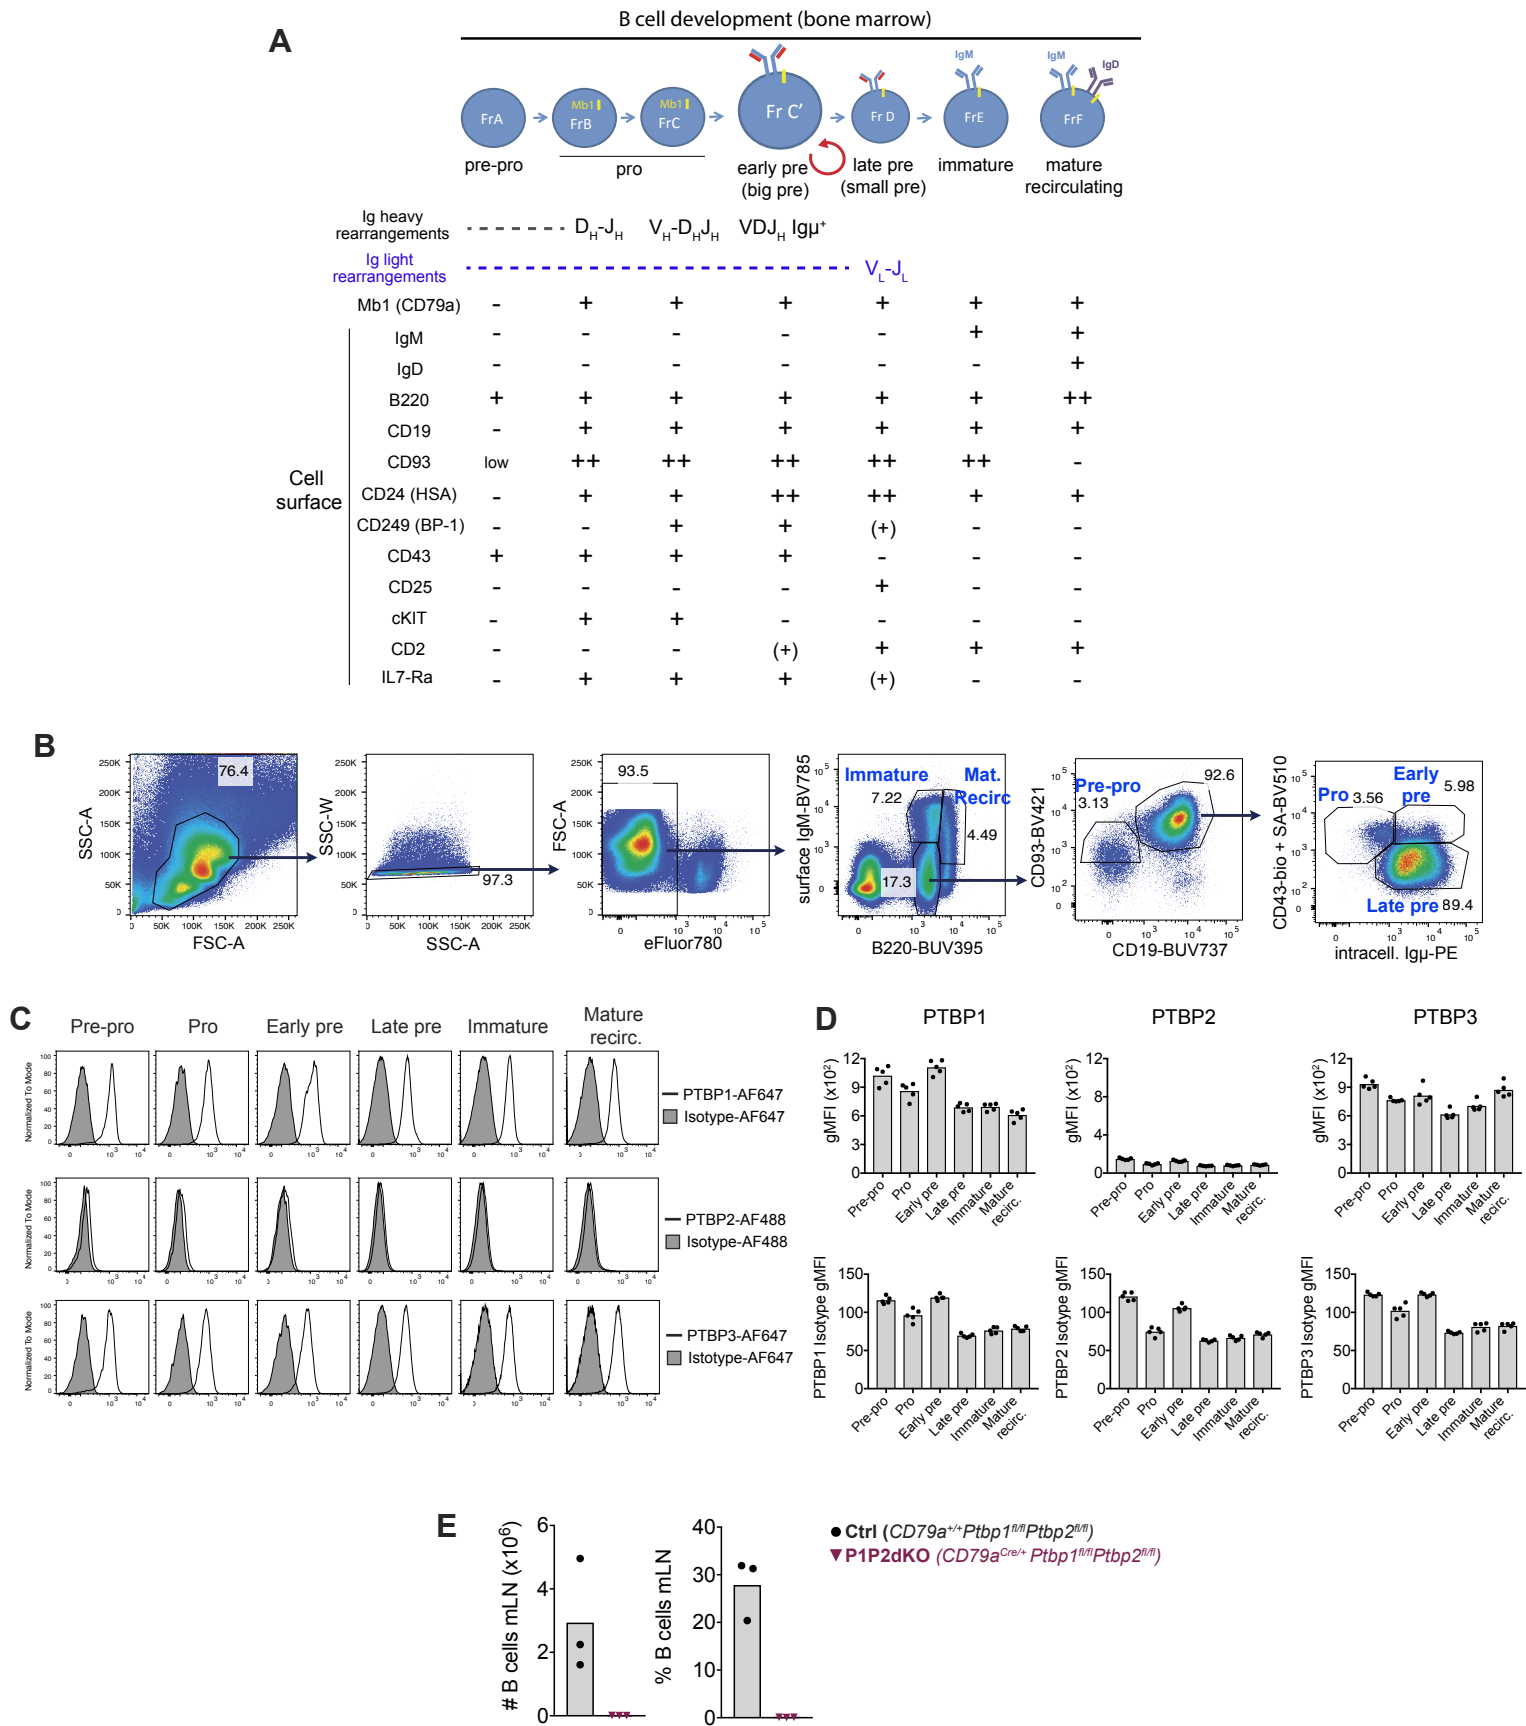

Figure S1

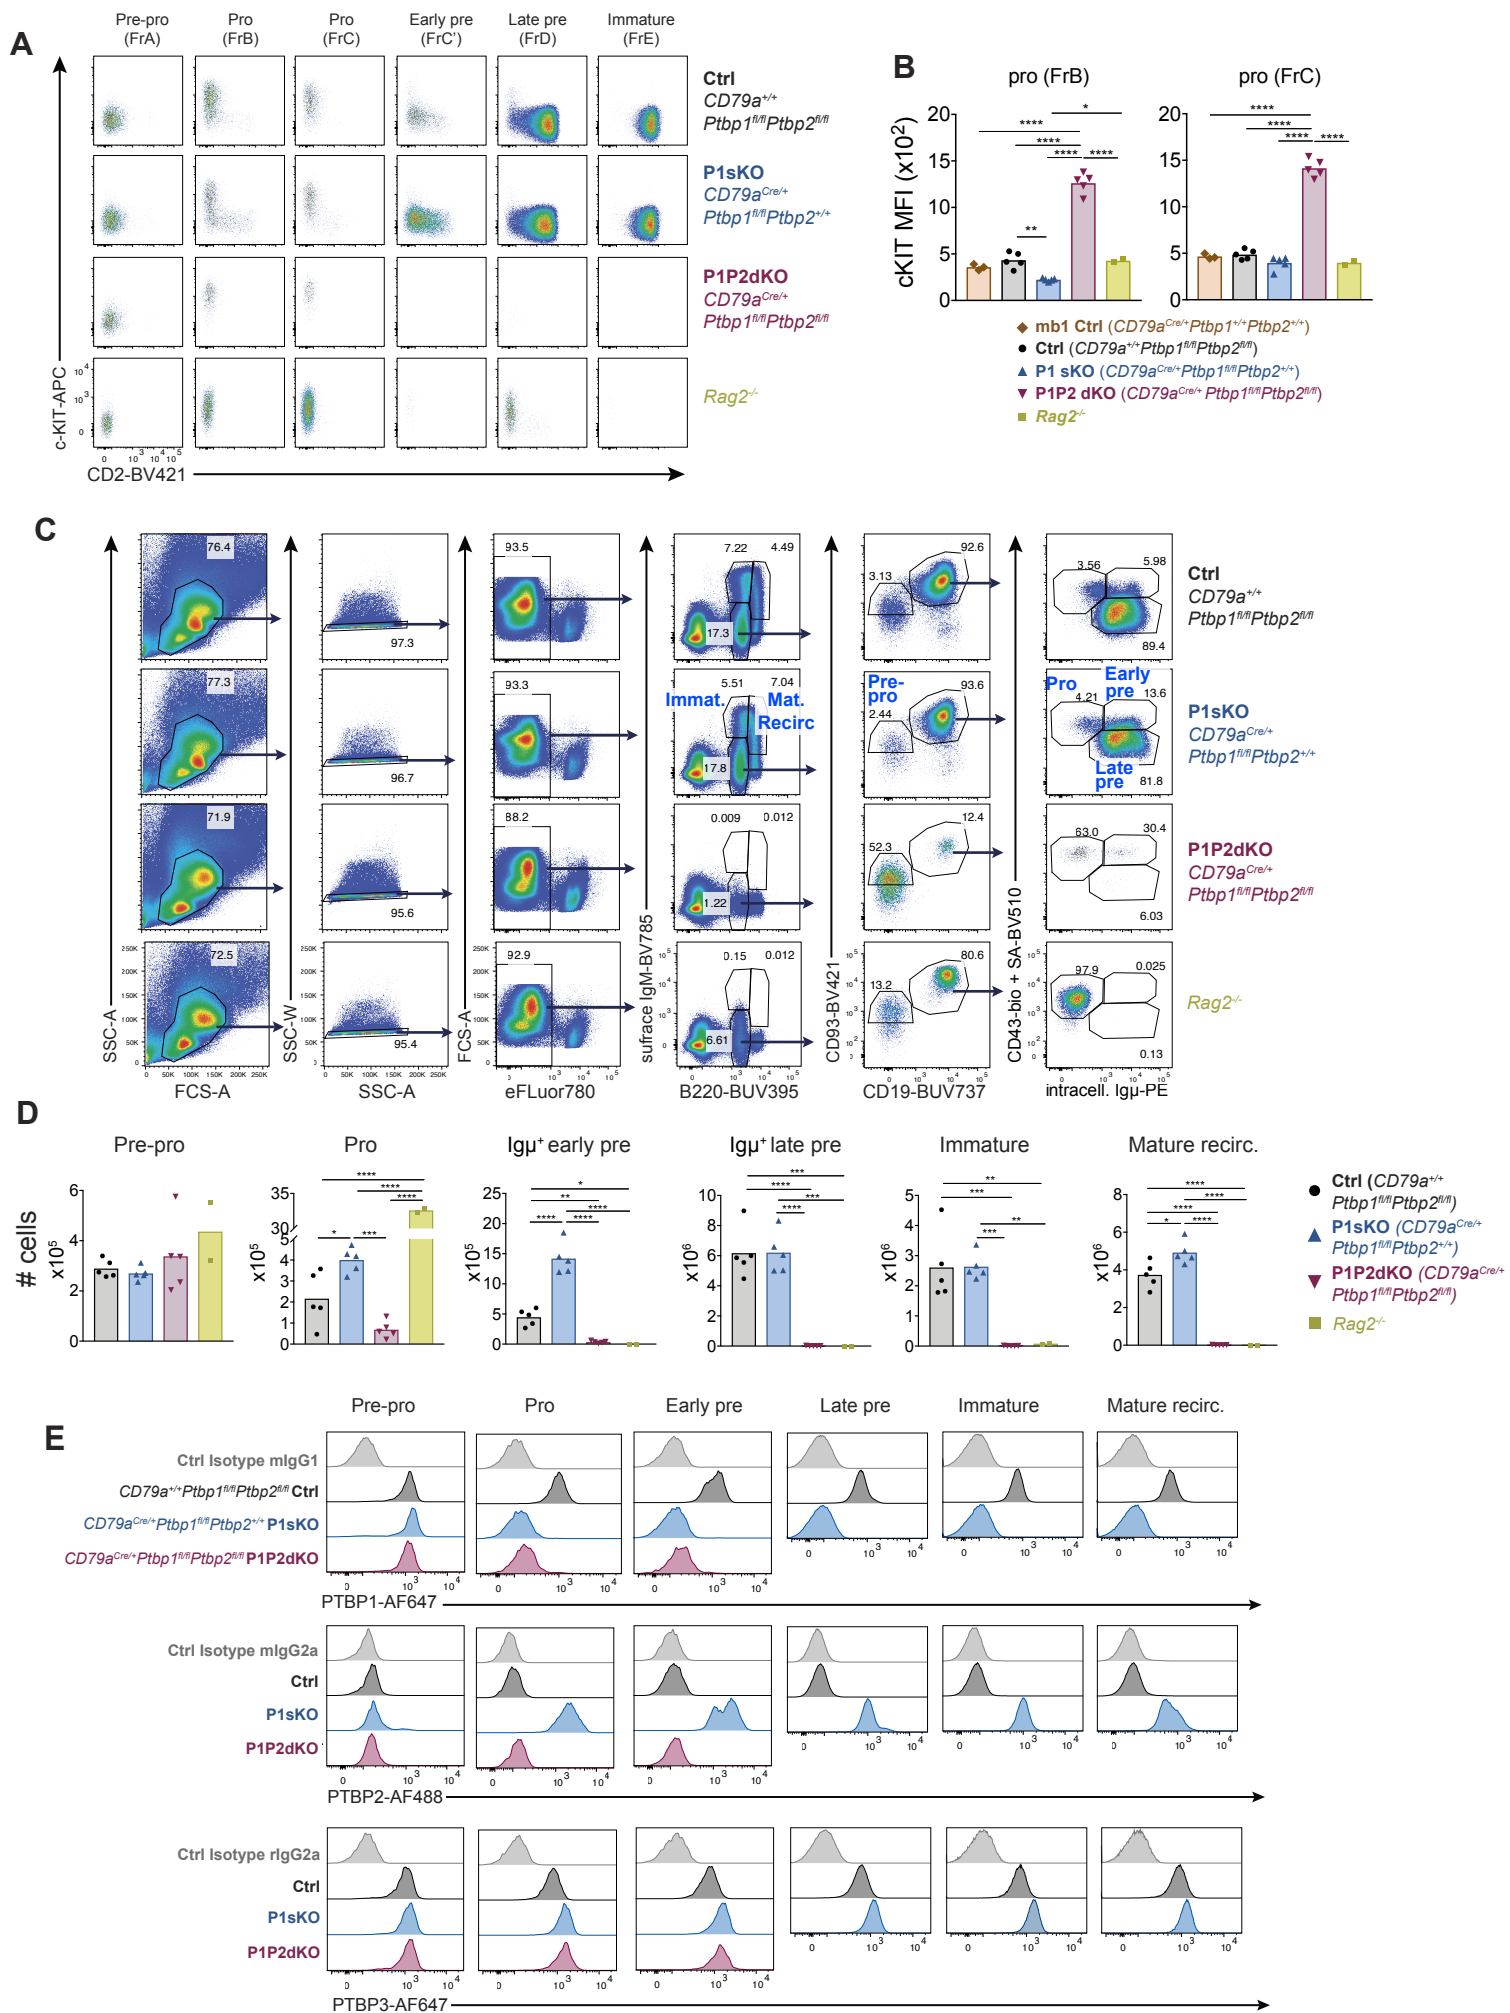

Figure S2

**a**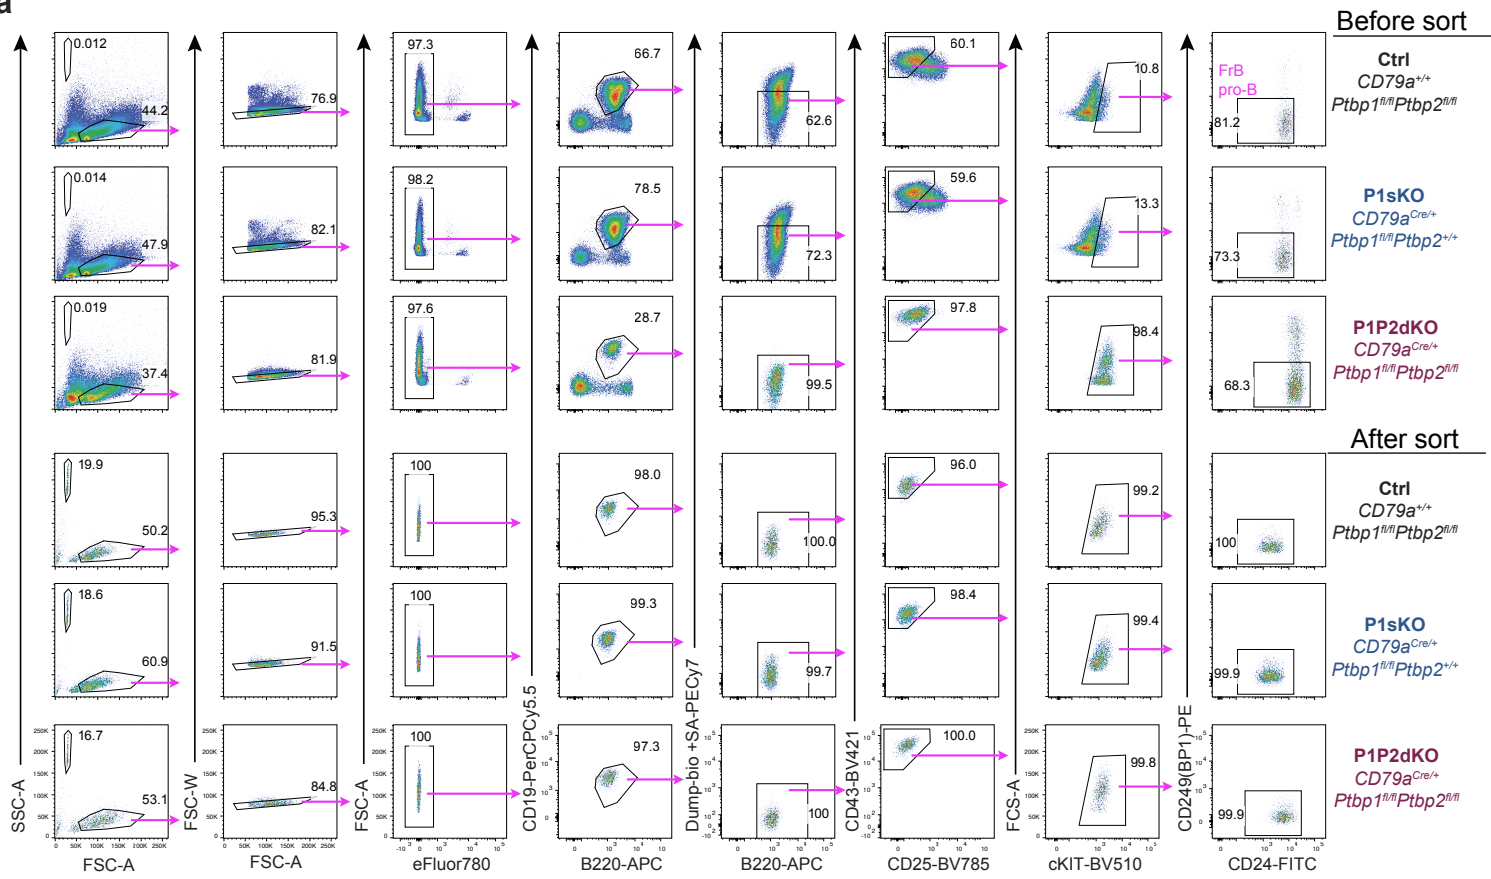

Figure S3

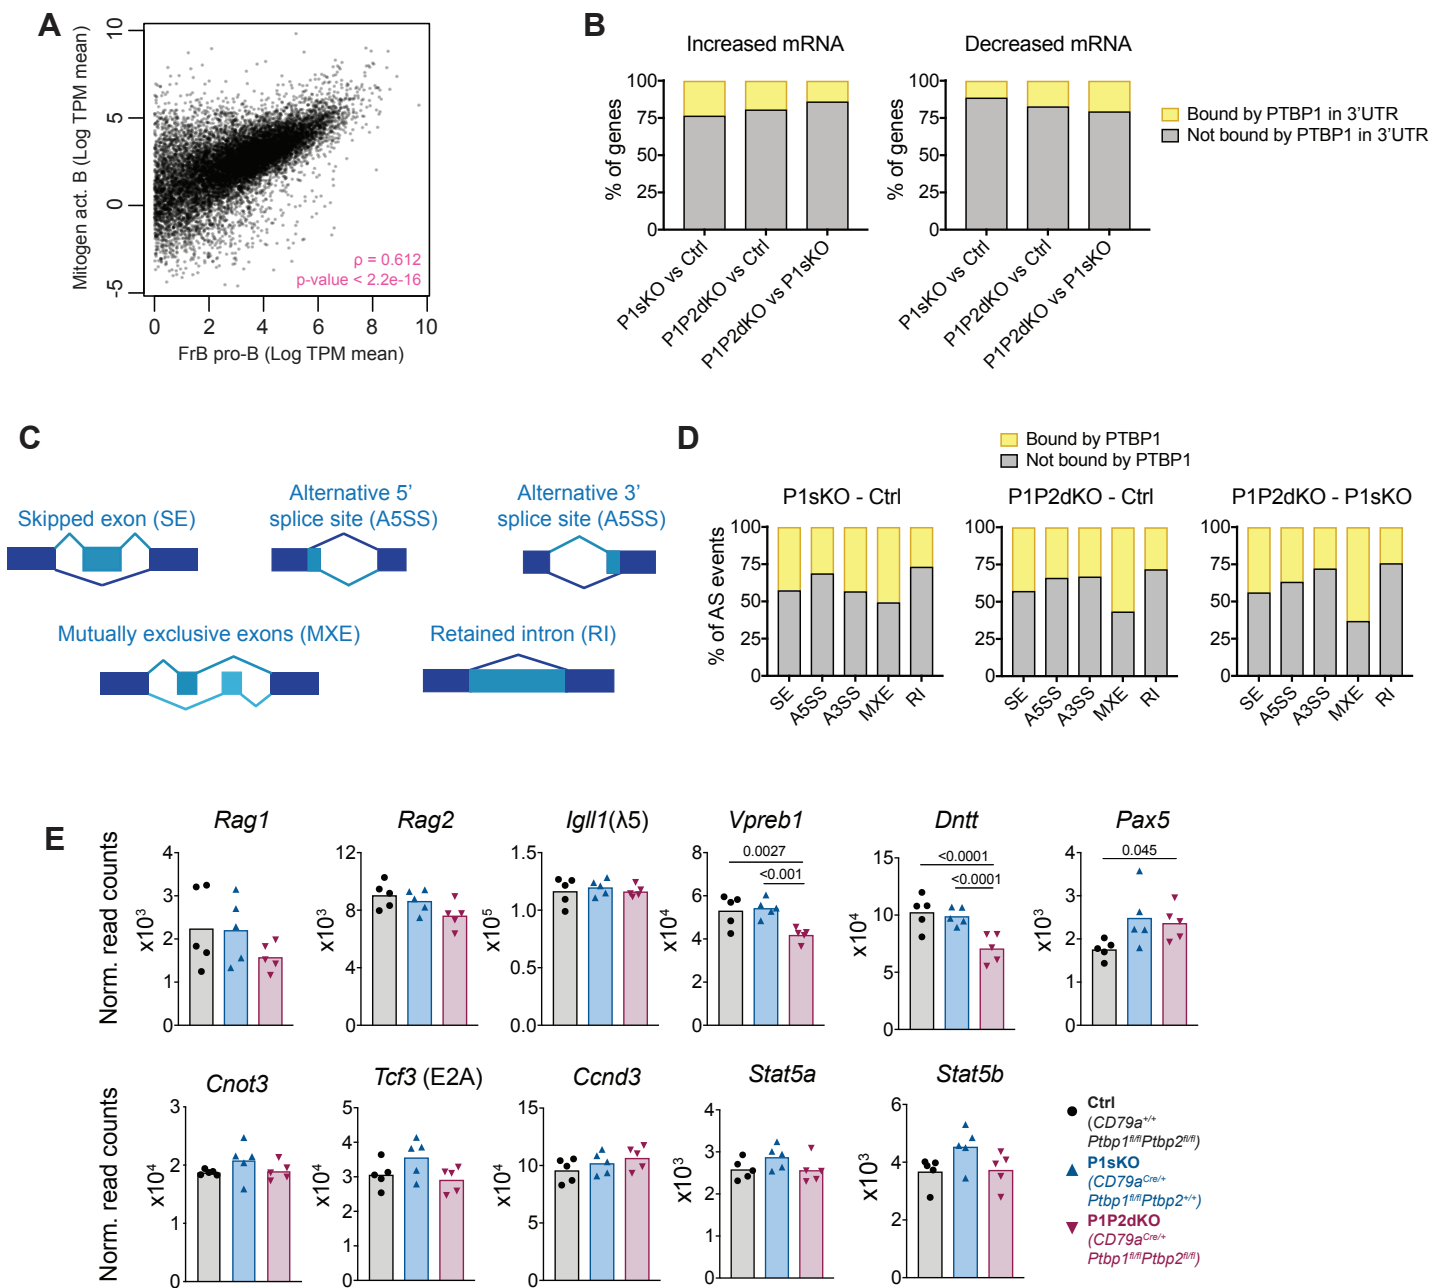

Figure S4

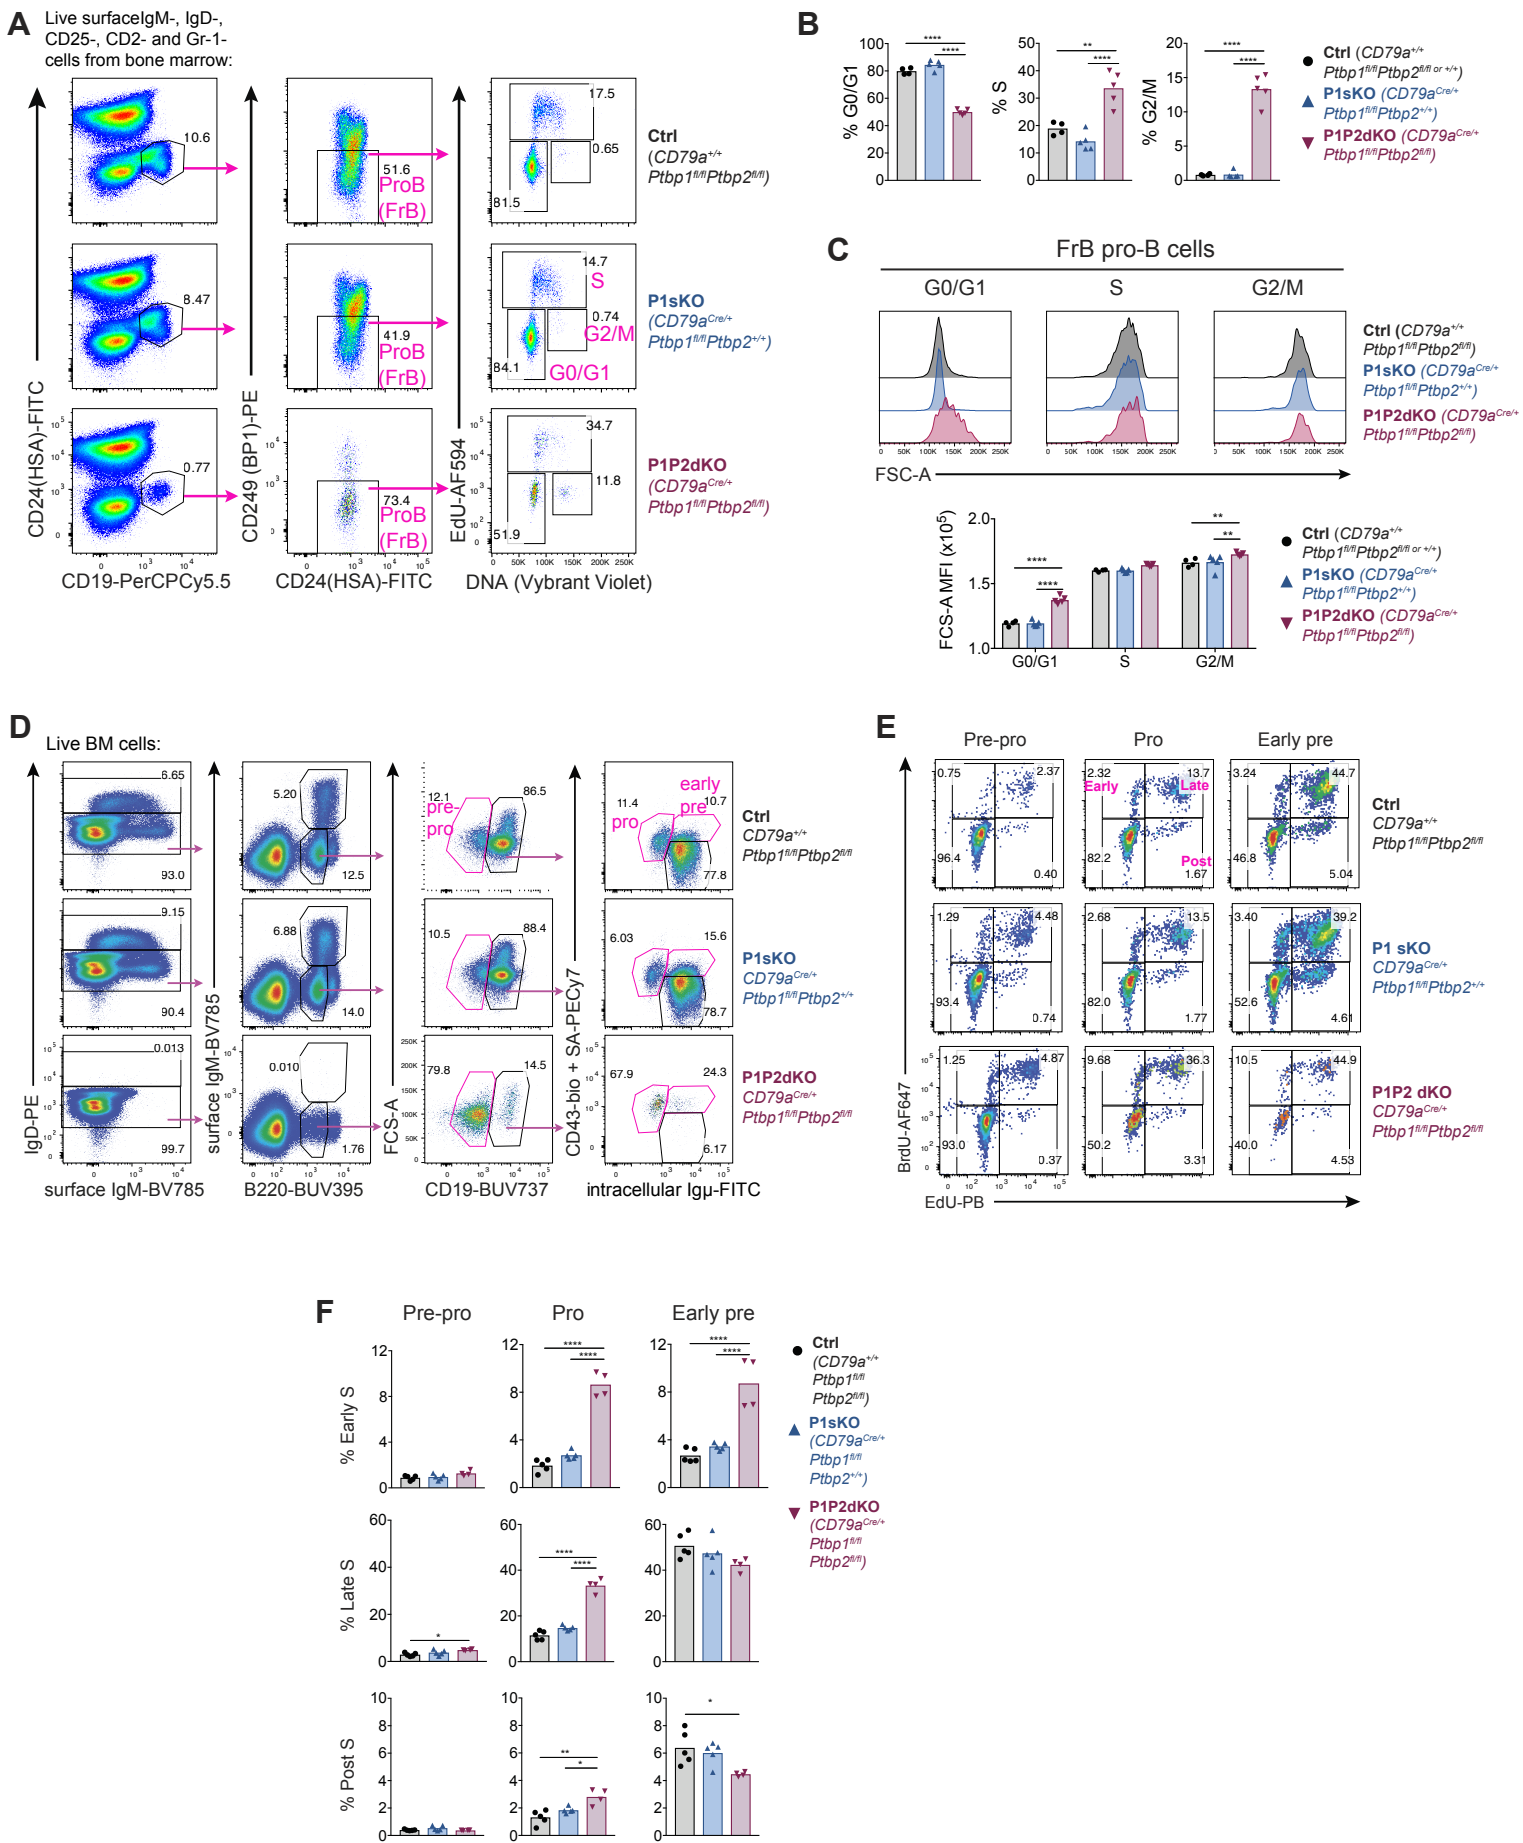

Figure S5

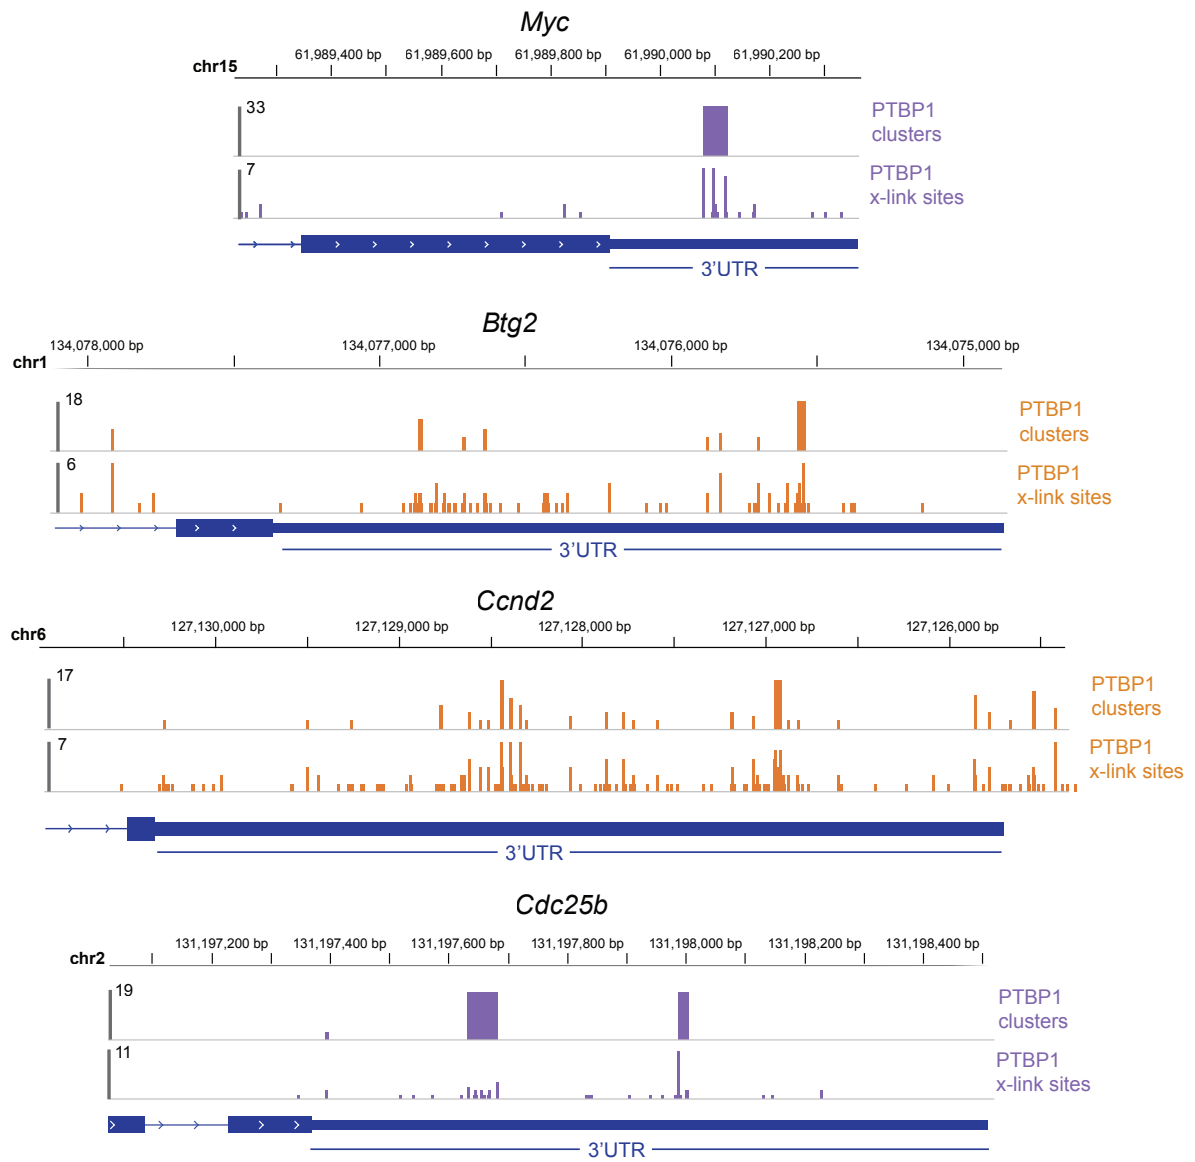

Figure S6
