# Supplementary material for: Polypyrimidine Tract Binding Proteins are essential for B cell development
Source: bioRxiv preprint, doi:10.1101/769141, version 3 (2019-11-12)
Supplement: Table S2 [file 769141_file04.csv]

	Chromosome	Start	End	Width	Strand	Score	Type	EnsemblID	GeneName
1	GL456221.1	113481	113481	1	-	4	CDS	ENSMUSG00000062783	Csprs
2	1	4893554	4893554	1	+	3	CDS	ENSMUSG00000033813	Tcea1
3	1	9747717	9747717	1	-	3	CDS	ENSMUSG00000045210	Vcpip1
4	1	10074916	10074916	1	+	3	CDS	ENSMUSG00000056763	Cspp1
5	1	10194299	10194299	1	-	4	CDS	ENSMUSG00000067851	Arfgef1
6	1	10199754	10199754	1	-	3	CDS	ENSMUSG00000067851	Arfgef1
7	1	13570016	13570020	5	-	7	CDS	ENSMUSG00000025935	Tram1
8	1	13570059	13570062	4	-	3	CDS	ENSMUSG00000025935	Tram1
9	1	16103214	16103214	1	-	3	CDS	ENSMUSG00000043716	Rpl7
10	1	21487234	21487236	3	-	3	CDS	ENSMUSG00000028033	Kcnq5
11	1	22288489	22288492	4	-	5	CDS	ENSMUSG00000041670	Rims1
12	1	33779972	33779972	1	-	4	CDS	ENSMUSG00000042197	Zfp451
13	1	34498524	34498524	1	+	2	CDS	ENSMUSG00000026125	Prss39
14	1	37366607	37366607	1	+	3	CDS	ENSMUSG00000026113	Inpp4a
15	1	38019168	38019169	2	+	3	CDS	ENSMUSG00000026083	Eif5b
16	1	45819498	45819498	1	+	3	CDS	ENSMUSG00000025995	Wdr75
17	1	52147912	52147915	4	+	3	CDS	ENSMUSG00000101628	Gm28177
18	1	52155989	52155992	4	+	6	CDS	ENSMUSG00000026104	Stat1
19	1	53318173	53318173	1	+	4	CDS	ENSMUSG00000026096	Osgepl1
20	1	54405887	54405887	1	-	3	CDS	ENSMUSG00000041303	Gtf3c3
21	1	54655696	54655696	1	-	4	CDS	ENSMUSG00000052331	Ankrd44
22	1	55000791	55000795	5	-	5	CDS	ENSMUSG00000025982	Sf3b1
23	1	55089085	55089086	2	+	3	CDS	ENSMUSG00000073676	Hspe1
24	1	57943095	57943095	1	+	2	CDS	ENSMUSG00000038305	Spats2l
25	1	58397822	58397823	2	+	4	CDS	ENSMUSG00000051223	Bzw1
26	1	58472313	58472314	2	-	3	CDS	ENSMUSG00000026037	Orc2
27	1	59692540	59692552	13	+	20	CDS	ENSMUSG00000026020	Nop58
28	1	63178471	63178471	1	+	3	CDS	ENSMUSG00000025967	Eef1b2
29	1	63179548	63179548	1	+	3	CDS	ENSMUSG00000025967	Eef1b2
30	1	66735596	66735597	2	-	3	CDS	ENSMUSG00000026004	Kansl1l
31	1	71075161	71075161	1	-	3	CDS	ENSMUSG00000026196	Bard1
32	1	72713209	72713209	1	+	4	CDS	ENSMUSG00000046330	Rpl37a
33	1	74254838	74254841	4	+	5	CDS	ENSMUSG00000006304	Arpc2
34	1	75192460	75192461	2	+	5	CDS	ENSMUSG00000026199	Ankzf1
35	1	75476129	75476130	2	-	3	CDS	ENSMUSG00000032997	Chpf
36	1	80503907	80503911	5	-	4	CDS	ENSMUSG00000038608	Dock10
37	1	80592644	80592645	2	-	3	CDS	ENSMUSG00000038608	Dock10
38	1	80664672	80664673	2	-	3	CDS	ENSMUSG00000038608	Dock10
39	1	82876253	82876253	1	+	3	CDS	ENSMUSG00000026159	Agfg1
40	1	84742252	84742252	1	-	4	CDS	ENSMUSG00000026219	Trip12
41	1	85577337	85577337	1	-	3	CDS	ENSMUSG00000070034	Sp110
42	1	86090049	86090052	4	+	3	CDS	ENSMUSG00000026229	Psmd1
43	1	86356096	86356102	7	-	5	CDS	ENSMUSG00000026234	Ncl
44	1	87407181	87407181	1	+	3	CDS	ENSMUSG00000048000	Gigyf2
45	1	93812694	93812694	1	+	3	CDS	ENSMUSG00000026283	Ing5
46	1	106030027	106030030	4	+	7	CDS	ENSMUSG00000038866	Zcchc2
47	1	128184592	128184592	1	+	3	CDS	ENSMUSG00000056211	R3hdm1
48	1	128339370	128339371	2	-	3	CDS	ENSMUSG00000026355	Mcm6
49	1	128345915	128345918	4	-	7	CDS	ENSMUSG00000026355	Mcm6
50	1	128349355	128349356	2	-	3	CDS	ENSMUSG00000026355	Mcm6
51	1	128412367	128412368	2	-	3	CDS	ENSMUSG00000026356	Dars
52	1	131164630	131164630	1	+	3	CDS	ENSMUSG00000026427	Eif2d
53	1	131244769	131244769	1	-	3	CDS	ENSMUSG00000026430	Rassf5
54	1	131929662	131929662	1	+	3	CDS	ENSMUSG00000026434	Nucks1
55	1	132018454	132018459	6	+	5	CDS	ENSMUSG00000026436	Elk4
56	1	133088231	133088231	1	+	3	CDS	ENSMUSG00000026447	Pik3c2b
57	1	133625848	133625848	1	-	3	CDS	ENSMUSG00000102976	Zc3h11a
58	1	133639073	133639073	1	-	3	CDS	ENSMUSG00000102976	Zc3h11a
59	1	135391913	135391915	3	-	3	CDS	ENSMUSG00000041879	Ipo9
60	1	136471342	136471342	1	+	3	CDS	ENSMUSG00000041498	Kif14
61	1	136471538	136471538	1	+	4	CDS	ENSMUSG00000041498	Kif14
62	1	152771472	152771476	5	+	3	CDS	ENSMUSG00000008475	Arpc5
63	1	152843248	152843248	1	-	4	CDS	ENSMUSG00000042772	Smg7
64	1	152845498	152845500	3	-	4	CDS	ENSMUSG00000042772	Smg7
65	1	152856549	152856549	1	-	3	CDS	ENSMUSG00000042772	Smg7
66	1	153458119	153458119	1	-	3	CDS	ENSMUSG00000042699	Dhx9
67	1	156052140	156052143	4	+	3	CDS	ENSMUSG00000050565	Tor1aip2
68	1	156439315	156439315	1	-	3	CDS	ENSMUSG00000026600	Soat1
69	1	156446673	156446675	3	-	4	CDS	ENSMUSG00000026600	Soat1
70	1	160672658	160672659	2	-	3	CDS	ENSMUSG00000026721	Rabgap1l
71	1	161417183	161417183	1	+	2	CDS	ENSMUSG00000026700	Tnfsf4
72	1	161970705	161970705	1	+	2	CDS	ENSMUSG00000103393	Gm38304
73	1	162679593	162679595	3	-	3	CDS	ENSMUSG00000040225	Prrc2c
74	1	162679829	162679832	4	-	3	CDS	ENSMUSG00000040225	Prrc2c
75	1	162682338	162682340	3	-	3	CDS	ENSMUSG00000040225	Prrc2c
76	1	162706401	162706401	1	-	3	CDS	ENSMUSG00000040225	Prrc2c
77	1	170927467	170927467	1	-	3	CDS	ENSMUSG00000038421	Fcrla
78	1	171136144	171136145	2	-	3	CDS	ENSMUSG00000058076	Sdhc
79	1	171840664	171840664	1	+	3	CDS	ENSMUSG00000038147	Cd84
80	1	171896353	171896355	3	+	4	CDS	ENSMUSG00000073492	Gm10521
81	1	172377705	172377705	1	+	5	CDS	ENSMUSG00000050229	Pigm
82	1	172562098	172562099	2	+	11	CDS	ENSMUSG00000049598	Vsig8
83	1	175692172	175692172	1	-	3	CDS	ENSMUSG00000078185	Chml
84	1	178249302	178249302	1	+	3	CDS	ENSMUSG00000026502	Desi2
85	1	178333001	178333005	5	-	4	CDS	ENSMUSG00000039630	Hnrnpu
86	1	185372980	185372984	5	+	11	CDS	ENSMUSG00000026615	Eprs
87	1	191177352	191177352	1	-	5	CDS	ENSMUSG00000026628	Atf3
88	1	191586630	191586632	3	+	6	CDS	ENSMUSG00000037461	Ints7
89	1	191822582	191822582	1	+	4	CDS	ENSMUSG00000026622	Nek2
90	1	193187169	193187169	1	-	3	CDS	ENSMUSG00000037318	Traf3ip3
91	10	18094896	18094899	4	+	3	CDS	ENSMUSG00000019854	Reps1
92	10	20278272	20278272	1	+	3	CDS	ENSMUSG00000019996	Map7
93	10	25499913	25499914	2	+	3	CDS	ENSMUSG00000019978	Epb41l2
94	10	29317619	29317619	1	+	3	CDS	ENSMUSG00000019883	Echdc1
95	10	37136447	37136448	2	-	3	CDS	ENSMUSG00000069662	Marcks
96	10	41240604	41240604	1	-	4	CDS	ENSMUSG00000038417	Fig4
97	10	41479673	41479673	1	+	3	CDS	ENSMUSG00000019823	Mical1
98	10	43582716	43582732	17	+	14	CDS	ENSMUSG00000047139	Cd24a
99	10	51494138	51494138	1	+	3	CDS	ENSMUSG00000112148	Lilrb4a
100	10	53907542	53907546	5	-	5	CDS	ENSMUSG00000003746	Man1a
101	10	58455334	58455334	1	+	3	CDS	ENSMUSG00000003226	Ranbp2
102	10	58477788	58477788	1	+	3	CDS	ENSMUSG00000003226	Ranbp2
103	10	58480264	58480266	3	+	3	CDS	ENSMUSG00000003226	Ranbp2
104	10	60403018	60403018	1	+	2	CDS	ENSMUSG00000090439	Gm17455
105	10	60403078	60403078	1	+	2	CDS	ENSMUSG00000090439	Gm17455
106	10	61433812	61433814	3	-	3	CDS	ENSMUSG00000020091	Eif4ebp2
107	10	64087903	64087903	1	-	2	CDS	ENSMUSG00000042846	Lrrtm3
108	10	67220127	67220127	1	+	3	CDS	ENSMUSG00000037876	Jmjd1c
109	10	71336395	71336395	1	-	3	CDS	ENSMUSG00000037710	Cisd1
110	10	75974247	75974247	1	+	3	CDS	ENSMUSG00000033255	Gm5134
111	10	76493515	76493516	2	+	3	CDS	ENSMUSG00000001150	Mcm3ap
112	10	78182698	78182698	1	-	3	CDS	ENSMUSG00000032834	Pwp2
113	10	78400963	78400963	1	-	3	CDS	ENSMUSG00000061032	Rrp1
114	10	79859488	79859490	3	+	6	CDS	ENSMUSG00000006498	Ptbp1
115	10	79899317	79899317	1	-	2	CDS	ENSMUSG00000013833	Med16
116	10	79984001	79984002	2	-	3	CDS	ENSMUSG00000013858	Tmem259
117	10	80150104	80150107	4	+	4	CDS	ENSMUSG00000035621	Midn
118	10	80153658	80153658	1	+	6	CDS	ENSMUSG00000035621	Midn
119	10	80312232	80312232	1	+	2	CDS	ENSMUSG00000020135	Apc2
120	10	80668612	80668613	2	-	3	CDS	ENSMUSG00000020190	Mknk2
121	10	80671993	80671995	3	-	3	CDS	ENSMUSG00000020190	Mknk2
122	10	80792274	80792278	5	+	5	CDS	ENSMUSG00000061589	Dot1l
123	10	80792491	80792492	2	+	3	CDS	ENSMUSG00000061589	Dot1l
124	10	81177734	81177740	7	+	4	CDS	ENSMUSG00000034994	Eef2
125	10	81178066	81178066	1	+	4	CDS	ENSMUSG00000034994	Eef2
126	10	81178840	81178845	6	+	5	CDS	ENSMUSG00000034994	Eef2
127	10	81179958	81179964	7	+	7	CDS	ENSMUSG00000034994	Eef2
128	10	81181945	81181945	1	+	4	CDS	ENSMUSG00000034994	Eef2
129	10	86692458	86692458	1	-	6	CDS	ENSMUSG00000020048	Hsp90b1
130	10	86698688	86698693	6	-	8	CDS	ENSMUSG00000020048	Hsp90b1
131	10	90999714	90999715	2	-	5	CDS	ENSMUSG00000019979	Apaf1
132	10	91118846	91118848	3	-	4	CDS	ENSMUSG00000061904	Slc25a3
133	10	91149506	91149509	4	-	3	CDS	ENSMUSG00000019961	Tmpo
134	10	91162525	91162531	7	-	8	CDS	ENSMUSG00000019961	Tmpo
135	10	100016093	100016094	2	+	20	CDS	ENSMUSG00000019966	Kitl
136	10	111293118	111293122	5	+	3	CDS	ENSMUSG00000020189	Osbpl8
137	10	115430716	115430716	1	+	3	CDS	ENSMUSG00000034163	Zfc3h1
138	10	117360972	117360975	4	-	3	CDS	ENSMUSG00000055531	Cpsf6
139	10	117361205	117361222	18	-	20	CDS	ENSMUSG00000055531	Cpsf6
140	10	120223878	120223879	2	+	3	CDS	ENSMUSG00000020225	Tmbim4
141	10	120224623	120224630	8	+	51	CDS	ENSMUSG00000020225	Tmbim4
142	10	120224660	120224661	2	+	4	CDS	ENSMUSG00000020225	Tmbim4
143	10	121611696	121611696	1	-	4	CDS	ENSMUSG00000034667	Xpot
144	10	127064955	127064957	3	+	8	CDS	ENSMUSG00000006728	Cdk4
145	10	127065238	127065260	23	+	72	CDS	ENSMUSG00000006728	Cdk4
146	10	127068948	127068951	4	-	3	CDS	ENSMUSG00000006736	Tspan31
147	10	127284992	127284994	3	-	4	CDS	ENSMUSG00000025409	Mbd6
148	10	127350815	127350815	1	-	3	CDS	ENSMUSG00000047492	Inhbe
149	10	128039939	128039940	2	+	4	CDS	ENSMUSG00000061315	Naca
150	10	128086176	128086176	1	+	3	CDS	ENSMUSG00000025393	Atp5b
151	10	128088326	128088330	5	+	3	CDS	ENSMUSG00000025393	Atp5b
152	10	128088498	128088498	1	+	3	CDS	ENSMUSG00000025393	Atp5b
153	10	128240594	128240594	1	+	3	CDS	ENSMUSG00000039994	Timeless
154	10	128283972	128283972	1	+	3	CDS	ENSMUSG00000040033	Stat2
155	10	128515731	128515731	1	-	3	CDS	ENSMUSG00000025366	Esyt1
156	10	128519173	128519173	1	-	3	CDS	ENSMUSG00000025366	Esyt1
157	10	128820307	128820307	1	-	3	CDS	ENSMUSG00000025353	Ormdl2
158	11	3308013	3308013	1	+	3	CDS	ENSMUSG00000020453	Patz1
159	11	4147704	4147706	3	-	5	CDS	ENSMUSG00000051427	Ccdc157
160	11	4174105	4174105	1	+	4	CDS	ENSMUSG00000002129	Sf3a1
161	11	4702198	4702198	1	-	4	CDS	ENSMUSG00000059534	Uqcr10
162	11	5524323	5524326	4	+	10	CDS	ENSMUSG00000020484	Xbp1
163	11	6399602	6399602	1	+	3	CDS	ENSMUSG00000041164	Zmiz2
164	11	6403811	6403812	2	+	4	CDS	ENSMUSG00000041164	Zmiz2
165	11	6415974	6415975	2	+	4	CDS	ENSMUSG00000071866	Ppia
166	11	6514850	6514850	1	-	3	CDS	ENSMUSG00000020437	Myo1g
167	11	11754017	11754018	2	+	4	CDS	ENSMUSG00000018654	Ikzf1
168	11	17193024	17193024	1	+	4	CDS	ENSMUSG00000078970	Wdr92
169	11	20064762	20064762	1	-	3	CDS	ENSMUSG00000020152	Actr2
170	11	20080725	20080728	4	-	3	CDS	ENSMUSG00000020152	Actr2
171	11	20698244	20698244	1	-	4	CDS	ENSMUSG00000049659	Aftph
172	11	20709692	20709693	2	-	3	CDS	ENSMUSG00000049659	Aftph
173	11	20829389	20829389	1	-	2	CDS	ENSMUSG00000042363	Lgalsl
174	11	21557453	21557453	1	-	3	CDS	ENSMUSG00000020321	Mdh1
175	11	23291535	23291536	2	+	4	CDS	ENSMUSG00000020290	Xpo1
176	11	23293849	23293850	2	+	5	CDS	ENSMUSG00000020290	Xpo1
177	11	23293880	23293883	4	+	3	CDS	ENSMUSG00000020290	Xpo1
178	11	23446477	23446477	1	+	3	CDS	ENSMUSG00000056342	Usp34
179	11	23748796	23748796	1	-	3	CDS	ENSMUSG00000020275	Rel
180	11	34362828	34362896	69	-	16	CDS	ENSMUSG00000020143	Dock2
181	11	40714124	40714125	2	-	3	CDS	ENSMUSG00000020330	Hmmr
182	11	44551809	44551809	1	+	3	CDS	ENSMUSG00000019189	Rnf145
183	11	46137401	46137402	2	+	3	CDS	ENSMUSG00000011256	Adam19
184	11	46440754	46440754	1	+	4	CDS	ENSMUSG00000020397	Med7
185	11	48801765	48801771	7	+	4	CDS	ENSMUSG00000020372	Rack1
186	11	48803463	48803466	4	+	6	CDS	ENSMUSG00000020372	Rack1
187	11	48804206	48804208	3	+	14	CDS	ENSMUSG00000020372	Rack1
188	11	49020324	49020324	1	-	2	CDS	ENSMUSG00000069892	9930111J21Rik2
189	11	50307480	50307480	1	-	3	CDS	ENSMUSG00000020368	Canx
190	11	50308331	50308334	4	-	4	CDS	ENSMUSG00000020368	Canx
191	11	50602294	50602294	1	+	5	CDS	ENSMUSG00000036545	Adamts2
192	11	51268788	51268789	2	+	3	CDS	ENSMUSG00000020385	Clk4
193	11	52118138	52118138	1	+	3	CDS	ENSMUSG00000020349	Ppp2ca
194	11	53269851	53269851	1	-	5	CDS	ENSMUSG00000020361	Hspa4
195	11	53271006	53271022	17	-	9	CDS	ENSMUSG00000020361	Hspa4
196	11	53283548	53283548	1	-	3	CDS	ENSMUSG00000020361	Hspa4
197	11	53332471	53332471	1	+	3	CDS	ENSMUSG00000018239	Zcchc10
198	11	54917879	54917880	2	-	3	CDS	ENSMUSG00000020400	Tnip1
199	11	55498034	55498034	1	+	3	CDS	ENSMUSG00000018583	G3bp1
200	11	59548051	59548051	1	+	2	CDS	ENSMUSG00000032691	Nlrp3
201	11	60478992	60478992	1	+	2	CDS	ENSMUSG00000042678	Myo15
202	11	60745893	60745893	1	-	4	CDS	ENSMUSG00000002814	Top3a
203	11	62338139	62338139	1	-	3	CDS	ENSMUSG00000018501	Ncor1
204	11	62539024	62539027	4	-	105	CDS	ENSMUSG00000018509	Cenpv
205	11	64436187	64436188	2	+	13	CDS	ENSMUSG00000047759	Hs3st3a1
206	11	69003817	69003818	2	-	3	CDS	ENSMUSG00000020899	Pfas
207	11	69657248	69657250	3	-	4	CDS	ENSMUSG00000018761	Mpdu1
208	11	69734713	69734714	2	-	4	CDS	ENSMUSG00000005198	Polr2a
209	11	69735110	69735133	24	-	10	CDS	ENSMUSG00000005198	Polr2a
210	11	69735217	69735218	2	-	4	CDS	ENSMUSG00000005198	Polr2a
211	11	69735316	69735321	6	-	4	CDS	ENSMUSG00000005198	Polr2a
212	11	69735355	69735358	4	-	3	CDS	ENSMUSG00000005198	Polr2a
213	11	69735469	69735469	1	-	3	CDS	ENSMUSG00000005198	Polr2a
214	11	69984768	69984768	1	+	3	CDS	ENSMUSG00000018559	Ctdnep1
215	11	70219216	70219217	2	-	4	CDS	ENSMUSG00000044367	Slc16a13
216	11	70436905	70436905	1	+	2	CDS	ENSMUSG00000060216	Arrb2
217	11	70603909	70603911	3	+	4	CDS	ENSMUSG00000020827	Mink1
218	11	70652129	70652132	4	-	5	CDS	ENSMUSG00000018293	Pfn1
219	11	70652937	70652937	1	-	5	CDS	ENSMUSG00000018293	Pfn1
220	11	70982194	70982195	2	-	3	CDS	ENSMUSG00000018446	C1qbp
221	11	70982737	70982737	1	-	3	CDS	ENSMUSG00000018446	C1qbp
222	11	71783295	71783295	1	+	2	CDS	ENSMUSG00000020811	Wscd1
223	11	72306640	72306640	1	+	3	CDS	ENSMUSG00000040483	Xaf1
224	11	72740595	72740595	1	+	3	CDS	ENSMUSG00000020790	Ankfy1
225	11	72830639	72830644	6	+	7	CDS	ENSMUSG00000055670	Zzef1
226	11	72982814	72982814	1	+	4	CDS	ENSMUSG00000020788	Atp2a3
227	11	72988033	72988036	4	+	5	CDS	ENSMUSG00000020788	Atp2a3
228	11	72988976	72988979	4	+	5	CDS	ENSMUSG00000020788	Atp2a3
229	11	73077966	73077966	1	+	3	CDS	ENSMUSG00000020783	Ncbp3
230	11	73222960	73222960	1	+	3	CDS	ENSMUSG00000005951	Shpk
231	11	74907342	74907342	1	+	4	CDS	ENSMUSG00000038335	Tsr1
232	11	75416256	75416256	1	-	2	CDS	ENSMUSG00000000753	Serpinf1
233	11	75490448	75490448	1	+	4	CDS	ENSMUSG00000020850	Prpf8
234	11	75493103	75493103	1	+	4	CDS	ENSMUSG00000020850	Prpf8
235	11	75495302	75495303	2	+	10	CDS	ENSMUSG00000020850	Prpf8
236	11	75503416	75503416	1	+	3	CDS	ENSMUSG00000020850	Prpf8
237	11	75504803	75504803	1	+	3	CDS	ENSMUSG00000020850	Prpf8
238	11	75756956	75756975	20	+	13	CDS	ENSMUSG00000020849	Ywhae
239	11	75759307	75759309	3	+	4	CDS	ENSMUSG00000020849	Ywhae
240	11	77504412	77504413	2	+	3	CDS	ENSMUSG00000011877	Git1
241	11	77777881	77777881	1	+	66	CDS	ENSMUSG00000000631	Myo18a
242	11	78165317	78165317	1	-	3	CDS	ENSMUSG00000017386	Traf4
243	11	78274625	78274625	1	+	3	CDS	ENSMUSG00000010277	2610507B11Rik
244	11	78305226	78305227	2	+	3	CDS	ENSMUSG00000002055	Spag5
245	11	79248516	79248516	1	-	3	CDS	ENSMUSG00000017677	Wsb1
246	11	80032182	80032182	1	+	3	CDS	ENSMUSG00000017548	Suz12
247	11	80364869	80364869	1	-	3	CDS	ENSMUSG00000057181	5730455P16Rik
248	11	80391910	80391911	2	+	3	CDS	ENSMUSG00000017421	Zfp207
249	11	80391973	80391975	3	+	4	CDS	ENSMUSG00000017421	Zfp207
250	11	80395426	80395426	1	+	3	CDS	ENSMUSG00000017421	Zfp207
251	11	83529241	83529241	1	-	2	CDS	ENSMUSG00000035042	Ccl5
252	11	83944660	83944660	1	+	4	CDS	ENSMUSG00000020677	Ddx52
253	11	84520392	84520392	1	-	2	CDS	ENSMUSG00000018698	Lhx1
254	11	86275383	86275384	2	-	3	CDS	ENSMUSG00000034297	Med13
255	11	86329332	86329333	2	-	4	CDS	ENSMUSG00000034297	Med13
256	11	86585392	86585397	6	-	11	CDS	ENSMUSG00000018171	Vmp1
257	11	86586558	86586560	3	-	3	CDS	ENSMUSG00000018171	Vmp1
258	11	86661220	86661220	1	-	3	CDS	ENSMUSG00000018171	Vmp1
259	11	86709071	86709071	1	-	3	CDS	ENSMUSG00000047126	Cltc
260	11	86719499	86719499	1	-	3	CDS	ENSMUSG00000047126	Cltc
261	11	87568962	87568963	2	+	2	CDS	ENSMUSG00000090107	Gm11492
262	11	87584478	87584479	2	+	3	CDS	ENSMUSG00000020486	Sept4
263	11	87774566	87774566	1	+	4	CDS	ENSMUSG00000034156	Tspoap1
264	11	87981477	87981477	1	-	4	CDS	ENSMUSG00000020483	Dynll2
265	11	88209860	88209861	2	+	3	CDS	ENSMUSG00000023723	Mrps23
266	11	88999860	88999861	2	+	4	CDS	ENSMUSG00000000275	Trim25
267	11	89016675	89016675	1	+	3	CDS	ENSMUSG00000000275	Trim25
268	11	89075068	89075068	1	+	2	CDS	ENSMUSG00000072553	Gm525
269	11	94338499	94338499	1	+	3	CDS	ENSMUSG00000020864	Ankrd40
270	11	94559564	94559567	4	-	6	CDS	ENSMUSG00000076435	Acsf2
271	11	95385847	95385847	1	+	3	CDS	ENSMUSG00000020873	Slc35b1
272	11	96819976	96819983	8	-	4	CDS	ENSMUSG00000038615	Nfe2l1
273	11	96820010	96820010	1	-	3	CDS	ENSMUSG00000038615	Nfe2l1
274	11	97206008	97206009	2	-	3	CDS	ENSMUSG00000001441	Npepps
275	11	97280218	97280218	1	-	3	CDS	ENSMUSG00000001441	Npepps
276	11	97373099	97373100	2	+	3	CDS	ENSMUSG00000038485	Socs7
277	11	98156146	98156149	4	-	3	CDS	ENSMUSG00000018160	Med1
278	11	98211053	98211054	2	+	4	CDS	ENSMUSG00000003119	Cdk12
279	11	98467243	98467244	2	-	4	CDS	ENSMUSG00000018168	Ikzf3
280	11	98768223	98768223	1	-	10	CDS	ENSMUSG00000020889	Nr1d1
281	11	98829329	98829329	1	+	3	CDS	ENSMUSG00000078676	Casc3
282	11	99006087	99006087	1	-	3	CDS	ENSMUSG00000020914	Top2a
283	11	99009284	99009284	1	-	3	CDS	ENSMUSG00000020914	Top2a
284	11	99018848	99018849	2	-	4	CDS	ENSMUSG00000020914	Top2a
285	11	100464261	100464262	2	-	2	CDS	ENSMUSG00000048732	Klhl11
286	11	100516798	100516798	1	-	3	CDS	ENSMUSG00000020917	Acly
287	11	100583599	100583601	3	-	7	CDS	ENSMUSG00000014195	Dnajc7
288	11	101043882	101043883	2	+	4	CDS	ENSMUSG00000019302	Atp6v0a1
289	11	102838887	102838887	1	-	4	CDS	ENSMUSG00000020929	Eftud2
290	11	103063901	103063901	1	+	2	CDS	ENSMUSG00000097410	Gm26668
291	11	106265027	106265027	1	-	3	CDS	ENSMUSG00000078619	Smarcd2
292	11	106786945	106786946	2	-	4	CDS	ENSMUSG00000020719	Ddx5
293	11	107613927	107613928	2	+	3	CDS	ENSMUSG00000020721	Helz
294	11	107716285	107716285	1	-	6	CDS	ENSMUSG00000020722	Cacng1
295	11	109662982	109662982	1	+	3	CDS	ENSMUSG00000020612	Prkar1a
296	11	115429422	115429422	1	+	3	CDS	ENSMUSG00000016940	Kctd2
297	11	115788746	115788746	1	+	7	CDS	ENSMUSG00000020747	Tmem94
298	11	116058278	116058278	1	+	3	CDS	ENSMUSG00000020770	Unk
299	11	117813175	117813178	4	+	6	CDS	ENSMUSG00000048277	Syngr2
300	11	118265020	118265021	2	-	4	CDS	ENSMUSG00000033909	Usp36
301	11	119038713	119038713	1	-	4	CDS	ENSMUSG00000025578	Cbx8
302	11	119458377	119458377	1	+	4	CDS	ENSMUSG00000070327	Rnf213
303	11	120124237	120124241	5	-	5	CDS	ENSMUSG00000061306	Slc38a10
304	11	120287503	120287506	4	+	6	CDS	ENSMUSG00000039741	Bahcc1
305	11	120347517	120347522	6	-	4	CDS	ENSMUSG00000062825	Actg1
306	11	120562730	120562731	2	-	4	CDS	ENSMUSG00000025130	P4hb
307	11	120563348	120563348	1	-	3	CDS	ENSMUSG00000025130	P4hb
308	11	120689184	120689187	4	+	4	CDS	ENSMUSG00000025142	Aspscr1
309	11	121296157	121296160	4	+	3	CDS	ENSMUSG00000039275	Foxk2
310	11	121296192	121296192	1	+	3	CDS	ENSMUSG00000039275	Foxk2
311	12	4134934	4134935	2	+	3	CDS	ENSMUSG00000020654	Adcy3
312	12	4629726	4629727	2	+	3	CDS	ENSMUSG00000020640	Itsn2
313	12	4640939	4640954	16	+	12	CDS	ENSMUSG00000020640	Itsn2
314	12	8713594	8713606	13	+	12	CDS	ENSMUSG00000020594	Pum2
315	12	8729040	8729041	2	+	3	CDS	ENSMUSG00000020594	Pum2
316	12	8934889	8934895	7	+	30	CDS	ENSMUSG00000020585	Laptm4a
317	12	11306084	11306084	1	+	4	CDS	ENSMUSG00000020608	Smc6
318	12	13432994	13432994	1	+	4	CDS	ENSMUSG00000020576	Nbas
319	12	16926980	16926981	2	+	3	CDS	ENSMUSG00000020580	Rock2
320	12	16958362	16958362	1	+	4	CDS	ENSMUSG00000020580	Rock2
321	12	16995669	16995670	2	-	3	CDS	ENSMUSG00000045679	Pqlc3
322	12	28746634	28746634	1	-	3	CDS	ENSMUSG00000020628	Trappc12
323	12	28746753	28746754	2	-	3	CDS	ENSMUSG00000020628	Trappc12
324	12	32974157	32974162	6	+	3	CDS	ENSMUSG00000020570	Sypl
325	12	55865985	55865985	1	+	17	CDS	ENSMUSG00000012076	Brms1l
326	12	57238662	57238662	1	+	2	CDS	ENSMUSG00000047022	Mipol1
327	12	65118306	65118306	1	+	3	CDS	ENSMUSG00000055884	Fancm
328	12	72094815	72094819	5	+	4	CDS	ENSMUSG00000005078	Jkamp
329	12	80108961	80108964	4	-	4	CDS	ENSMUSG00000021127	Zfp36l1
330	12	80109777	80109778	2	-	4	CDS	ENSMUSG00000021127	Zfp36l1
331	12	80109844	80109848	5	-	4	CDS	ENSMUSG00000021127	Zfp36l1
332	12	83675282	83675294	13	+	7	CDS	ENSMUSG00000010608	Rbm25
333	12	83723037	83723040	4	+	3	CDS	ENSMUSG00000019969	Psen1
334	12	84171709	84171709	1	-	3	CDS	ENSMUSG00000042507	Elmsan1
335	12	84772861	84772862	2	-	3	CDS	ENSMUSG00000021242	Npc2
336	12	84773322	84773322	1	+	4	CDS	ENSMUSG00000021241	Isca2
337	12	84997207	84997207	1	+	3	CDS	ENSMUSG00000021244	Ylpm1
338	12	85044524	85044524	1	+	3	CDS	ENSMUSG00000021244	Ylpm1
339	12	85240976	85240979	4	-	2	CDS	ENSMUSG00000021245	Mlh3
340	12	100129388	100129388	1	-	7	CDS	ENSMUSG00000021179	Nrde2
341	12	102479801	102479801	1	+	3	CDS	ENSMUSG00000021192	Golga5
342	12	103436678	103436678	1	+	4	CDS	ENSMUSG00000064215	Ifi27
343	12	104932283	104932283	1	-	3	CDS	ENSMUSG00000054150	Syne3
344	12	108202366	108202366	1	+	3	CDS	ENSMUSG00000021258	Ccnk
345	12	108793993	108793993	1	+	3	CDS	ENSMUSG00000021264	Yy1
346	12	110693066	110693068	3	-	4	CDS	ENSMUSG00000021270	Hsp90aa1
347	12	113421049	113421053	5	-	62	CDS	ENSMUSG00000076617	Ighm
348	12	113421112	113421135	24	-	26	CDS	ENSMUSG00000076617	Ighm
349	12	113421402	113421407	6	-	7	CDS	ENSMUSG00000076617	Ighm
350	12	113421430	113421435	6	-	9	CDS	ENSMUSG00000076617	Ighm
351	12	113421491	113421492	2	-	8	CDS	ENSMUSG00000076617	Ighm
352	12	113421563	113421572	10	-	20	CDS	ENSMUSG00000076617	Ighm
353	12	113421632	113421648	17	-	27	CDS	ENSMUSG00000076617	Ighm
354	12	113421994	113422001	8	-	40	CDS	ENSMUSG00000076617	Ighm
355	12	113422065	113422071	7	-	11	CDS	ENSMUSG00000076617	Ighm
356	12	113422491	113422493	3	-	8	CDS	ENSMUSG00000076617	Ighm
357	12	113422551	113422555	5	-	7	CDS	ENSMUSG00000076617	Ighm
358	12	113422613	113422650	38	-	114	CDS	ENSMUSG00000076617	Ighm
359	12	113422671	113422677	7	-	7	CDS	ENSMUSG00000076617	Ighm
360	12	113422700	113422722	23	-	27	CDS	ENSMUSG00000076617	Ighm
361	12	113429507	113429514	8	-	21	CDS	ENSMUSG00000076620	Ighj2
362	12	114538703	114538703	1	-	2	CDS	ENSMUSG00000095200	Ighv1-7
363	12	114657767	114657768	2	-	4	CDS	ENSMUSG00000103254	Ighv1-15
364	12	114915011	114915015	5	-	6	CDS	ENSMUSG00000095130	Ighv1-39
365	12	115294283	115294294	12	-	6	CDS	ENSMUSG00000104452	Ighv8-8
366	12	115868989	115868989	1	-	2	CDS	ENSMUSG00000096326	Ighv1-78
367	12	115912764	115912764	1	-	4	CDS	ENSMUSG00000094075	Ighv1-80
368	13	3556363	3556365	3	+	5	CDS	ENSMUSG00000021218	Gdi2
369	13	3565086	3565089	4	+	4	CDS	ENSMUSG00000021218	Gdi2
370	13	6555611	6555612	2	+	4	CDS	ENSMUSG00000021193	Pitrm1
371	13	8978586	8978586	1	-	3	CDS	ENSMUSG00000021149	Gtpbp4
372	13	9694313	9694315	3	-	3	CDS	ENSMUSG00000021156	Zmynd11
373	13	13681405	13681408	4	+	4	CDS	ENSMUSG00000019726	Lyst
374	13	14010625	14010625	1	-	3	CDS	ENSMUSG00000039233	Tbce
375	13	20589676	20589676	1	+	3	CDS	ENSMUSG00000041112	Elmo1
376	13	21388173	21388174	2	-	3	CDS	ENSMUSG00000021327	Zkscan3
377	13	21750204	21750205	2	-	3	CDS	ENSMUSG00000064288	Hist1h4k
378	13	23555656	23555656	1	+	3	CDS	ENSMUSG00000052565	Hist1h1d
379	13	23745070	23745088	19	-	32	CDS	ENSMUSG00000069310	Hist1h3c
380	13	23903068	23903068	1	-	2	CDS	ENSMUSG00000021336	Slc17a4
381	13	24013239	24013253	15	-	6	CDS	ENSMUSG00000021338	Carmil1
382	13	24696517	24696517	1	+	3	CDS	ENSMUSG00000036006	Ripor2
383	13	24701468	24701468	1	+	3	CDS	ENSMUSG00000036006	Ripor2
384	13	24717596	24717597	2	+	3	CDS	ENSMUSG00000036006	Ripor2
385	13	29805134	29805135	2	-	4	CDS	ENSMUSG00000006191	Cdkal1
386	13	33006635	33006635	1	+	6	CDS	ENSMUSG00000045827	Serpinb9
387	13	35898855	35898855	1	-	2	CDS	ENSMUSG00000021418	Rpp40
388	13	45078916	45078916	1	+	20	CDS	ENSMUSG00000047061	Gm9817
389	13	49147173	49147174	2	-	3	CDS	ENSMUSG00000037989	Wnk2
390	13	51702966	51702968	3	-	5	CDS	ENSMUSG00000021451	Sema4d
391	13	51703033	51703033	1	-	3	CDS	ENSMUSG00000021451	Sema4d
392	13	51703386	51703387	2	-	3	CDS	ENSMUSG00000021451	Sema4d
393	13	55346946	55346947	2	-	3	CDS	ENSMUSG00000021484	Lman2
394	13	55351188	55351189	2	-	7	CDS	ENSMUSG00000021484	Lman2
395	13	55507976	55507976	1	-	3	CDS	ENSMUSG00000021493	Pdlim7
396	13	58215351	58215351	1	-	3	CDS	ENSMUSG00000005312	Ubqln1
397	13	59758897	59758897	1	-	3	CDS	ENSMUSG00000044792	Isca1
398	13	63331891	63331891	1	-	3	CDS	ENSMUSG00000021461	Fancc
399	13	63347539	63347540	2	-	3	CDS	ENSMUSG00000021461	Fancc
400	13	63518250	63518250	1	-	3	CDS	ENSMUSG00000021466	Ptch1
401	13	63540823	63540823	1	-	4	CDS	ENSMUSG00000021466	Ptch1
402	13	63834773	63834773	1	+	3	CDS	ENSMUSG00000021470	Ercc6l2
403	13	65075573	65075573	1	-	3	CDS	ENSMUSG00000038212	Mfsd14b
404	13	66930057	66930057	1	-	4	CDS	ENSMUSG00000021519	Mterf3
405	13	66974481	66974482	2	+	6	CDS	ENSMUSG00000021518	Ptdss1
406	13	68999284	68999287	4	-	18	CDS	ENSMUSG00000021536	Adcy2
407	13	70610612	70610612	1	-	3	CDS	ENSMUSG00000034525	Ice1
408	13	74172109	74172109	1	-	3	CDS	ENSMUSG00000034152	Exoc3
409	13	74646238	74646238	1	+	3	CDS	ENSMUSG00000021583	Erap1
410	13	81476668	81476668	1	-	2	CDS	ENSMUSG00000069170	Adgrv1
411	13	92683367	92683367	1	+	3	CDS	ENSMUSG00000021703	Serinc5
412	13	93154996	93154998	3	-	8	CDS	ENSMUSG00000042167	Papd4
413	13	93939265	93939268	4	+	4	CDS	ENSMUSG00000042082	Arsb
414	13	95513255	95513258	4	-	34	CDS	ENSMUSG00000021678	F2rl1
415	13	96654823	96654823	1	-	3	CDS	ENSMUSG00000021670	Hmgcr
416	13	96658675	96658677	3	-	3	CDS	ENSMUSG00000021670	Hmgcr
417	13	96659066	96659067	2	-	4	CDS	ENSMUSG00000021670	Hmgcr
418	13	96659326	96659326	1	-	3	CDS	ENSMUSG00000021670	Hmgcr
419	13	96664827	96664835	9	-	8	CDS	ENSMUSG00000021670	Hmgcr
420	13	98856904	98856905	2	-	3	CDS	ENSMUSG00000009470	Tnpo1
421	13	98863752	98863752	1	-	4	CDS	ENSMUSG00000009470	Tnpo1
422	13	100814608	100814612	5	-	5	CDS	ENSMUSG00000021629	Slc30a5
423	13	101701772	101701773	2	-	4	CDS	ENSMUSG00000041417	Pik3r1
424	13	102706388	102706391	4	+	5	CDS	ENSMUSG00000021624	Cd180
425	13	104144232	104144232	1	-	3	CDS	ENSMUSG00000021711	Trappc13
426	13	104294808	104294808	1	+	3	CDS	ENSMUSG00000046169	Adamts6
427	13	111755394	111755395	2	-	3	CDS	ENSMUSG00000021754	Map3k1
428	14	14100392	14100392	1	+	3	CDS	ENSMUSG00000021738	Atxn7
429	14	14742472	14742494	23	+	16	CDS	ENSMUSG00000021733	Slc4a7
430	14	20467475	20467491	17	-	13	CDS	ENSMUSG00000021814	Anxa7
431	14	20520583	20520587	5	-	5	CDS	ENSMUSG00000021816	Ppp3cb
432	14	20695117	20695119	3	+	3	CDS	ENSMUSG00000039357	Fut11
433	14	20703088	20703088	1	+	3	CDS	ENSMUSG00000063787	Chchd1
434	14	24492069	24492072	4	+	4	CDS	ENSMUSG00000025290	Rps24
435	14	31186629	31186655	27	-	12	CDS	ENSMUSG00000021910	Nisch
436	14	32967565	32967565	1	-	7	CDS	ENSMUSG00000051506	Wdfy4
437	14	32974173	32974175	3	-	5	CDS	ENSMUSG00000051506	Wdfy4
438	14	32985671	32985671	1	-	3	CDS	ENSMUSG00000051506	Wdfy4
439	14	33020308	33020325	18	-	9	CDS	ENSMUSG00000051506	Wdfy4
440	14	33099076	33099077	2	-	5	CDS	ENSMUSG00000051506	Wdfy4
441	14	33133422	33133430	9	-	4	CDS	ENSMUSG00000051506	Wdfy4
442	14	33133600	33133601	2	-	6	CDS	ENSMUSG00000051506	Wdfy4
443	14	33146998	33146998	1	-	3	CDS	ENSMUSG00000051506	Wdfy4
444	14	33149569	33149572	4	-	3	CDS	ENSMUSG00000051506	Wdfy4
445	14	36890404	36890405	2	-	3	CDS	ENSMUSG00000058690	Ccser2
446	14	50926866	50926889	24	+	12	CDS	ENSMUSG00000035960	Apex1
447	14	52202187	52202187	1	-	3	CDS	ENSMUSG00000053754	Chd8
448	14	52213369	52213370	2	-	5	CDS	ENSMUSG00000053754	Chd8
449	14	54253652	54253692	41	-	25	CDS	ENSMUSG00000022174	Dad1
450	14	54408759	54408759	1	-	3	CDS	ENSMUSG00000000958	Slc7a7
451	14	54469093	54469096	4	+	6	CDS	ENSMUSG00000022175	Lrp10
452	14	54512033	54512034	2	-	3	CDS	ENSMUSG00000023110	Prmt5
453	14	54515386	54515389	4	-	5	CDS	ENSMUSG00000023110	Prmt5
454	14	54644686	54644686	1	-	4	CDS	ENSMUSG00000022185	Acin1
455	14	54644754	54644757	4	-	3	CDS	ENSMUSG00000022185	Acin1
456	14	55601712	55601715	4	+	3	CDS	ENSMUSG00000047098	Rnf31
457	14	55636329	55636332	4	-	3	CDS	ENSMUSG00000002320	Tm9sf1
458	14	55636489	55636491	3	-	4	CDS	ENSMUSG00000002320	Tm9sf1
459	14	55636532	55636536	5	-	6	CDS	ENSMUSG00000002320	Tm9sf1
460	14	55751237	55751237	1	+	4	CDS	ENSMUSG00000019297	Nop9
461	14	56647544	56647544	1	+	3	CDS	ENSMUSG00000054509	Parp4
462	14	56647712	56647714	3	+	3	CDS	ENSMUSG00000054509	Parp4
463	14	56648097	56648098	2	+	3	CDS	ENSMUSG00000054509	Parp4
464	14	56648389	56648390	2	+	7	CDS	ENSMUSG00000054509	Parp4
465	14	57847007	57847007	1	-	3	CDS	ENSMUSG00000021969	Zdhhc20
466	14	62708976	62708976	1	-	4	CDS	ENSMUSG00000035161	Ints6
467	14	64825584	64825584	1	-	3	CDS	ENSMUSG00000021972	Hmbox1
468	14	70225944	70225947	4	-	6	CDS	ENSMUSG00000022092	Ppp3cc
469	14	70439504	70439504	1	-	2	CDS	ENSMUSG00000000776	Polr3d
470	14	70671186	70671186	1	-	3	CDS	ENSMUSG00000022100	Xpo7
471	14	73363072	73363072	1	-	5	CDS	ENSMUSG00000022108	Itm2b
472	14	75198131	75198131	1	+	3	CDS	ENSMUSG00000021998	Lcp1
473	14	75199326	75199329	4	+	3	CDS	ENSMUSG00000021998	Lcp1
474	14	75200496	75200496	1	+	4	CDS	ENSMUSG00000021998	Lcp1
475	14	75206252	75206252	1	+	3	CDS	ENSMUSG00000021998	Lcp1
476	14	75215114	75215114	1	+	3	CDS	ENSMUSG00000021998	Lcp1
477	14	79768921	79768922	2	-	77	CDS	ENSMUSG00000036422	Pcdh8
478	14	105150762	105150762	1	-	3	CDS	ENSMUSG00000022119	Rbm26
479	14	121293464	121293465	2	-	3	CDS	ENSMUSG00000063410	Stk24
480	14	121337511	121337511	1	-	3	CDS	ENSMUSG00000063410	Stk24
481	14	121912013	121912015	3	-	4	CDS	ENSMUSG00000050350	Gpr18
482	14	122150832	122150834	3	+	3	CDS	ENSMUSG00000025544	Tm9sf2
483	14	122155484	122155484	1	+	3	CDS	ENSMUSG00000025544	Tm9sf2
484	15	8359229	8359232	4	-	3	CDS	ENSMUSG00000022141	Nipbl
485	15	9165857	9165857	1	+	3	CDS	ENSMUSG00000039704	Lmbrd2
486	15	10479107	10479108	2	-	3	CDS	ENSMUSG00000022247	Brix1
487	15	10982044	10982045	2	+	3	CDS	ENSMUSG00000022244	Amacr
488	15	12349455	12349455	1	+	3	CDS	ENSMUSG00000022200	Golph3
489	15	12349602	12349603	2	+	6	CDS	ENSMUSG00000022200	Golph3
490	15	30647027	30647029	3	+	3	CDS	ENSMUSG00000022240	Ctnnd2
491	15	31485992	31485992	1	-	3	CDS	ENSMUSG00000039100	March6
492	15	31492745	31492746	2	-	3	CDS	ENSMUSG00000039100	March6
493	15	31590997	31590997	1	-	4	CDS	ENSMUSG00000022234	Cct5
494	15	34118100	34118103	4	+	6	CDS	ENSMUSG00000022255	Mtdh
495	15	34121475	34121489	15	+	10	CDS	ENSMUSG00000022255	Mtdh
496	15	34442737	34442739	3	-	3	CDS	ENSMUSG00000058600	Rpl30
497	15	36600962	36600966	5	-	12	CDS	ENSMUSG00000022283	Pabpc1
498	15	36602896	36602900	5	-	5	CDS	ENSMUSG00000022283	Pabpc1
499	15	36608468	36608483	16	-	9	CDS	ENSMUSG00000022283	Pabpc1
500	15	37992128	37992129	2	-	3	CDS	ENSMUSG00000037487	Ubr5
501	15	38041543	38041543	1	-	3	CDS	ENSMUSG00000037487	Ubr5
502	15	55052244	55052244	1	-	3	CDS	ENSMUSG00000037343	Taf2
503	15	57875568	57875568	1	-	4	CDS	ENSMUSG00000022365	Derl1
504	15	58118404	58118404	1	-	3	CDS	ENSMUSG00000022360	Atad2
505	15	58899344	58899345	2	+	4	CDS	ENSMUSG00000037075	Rnf139
506	15	59329786	59329786	1	+	3	CDS	ENSMUSG00000022351	Sqle
507	15	59330763	59330764	2	+	4	CDS	ENSMUSG00000022351	Sqle
508	15	68180443	68180443	1	-	4	CDS	ENSMUSG00000022335	Zfat
509	15	74958608	74958619	12	+	10	CDS	ENSMUSG00000022587	Ly6e
510	15	75888696	75888696	1	-	2	CDS	ENSMUSG00000098678	Mroh6
511	15	76188541	76188541	1	-	4	CDS	ENSMUSG00000022565	Plec
512	15	76347697	76347700	4	-	3	CDS	ENSMUSG00000022552	Sharpin
513	15	76453670	76453671	2	-	3	CDS	ENSMUSG00000022557	Bop1
514	15	76538519	76538519	1	-	3	CDS	ENSMUSG00000022559	Fbxl6
515	15	76698350	76698350	1	+	2	CDS	ENSMUSG00000022546	Gpt
516	15	76702168	76702168	1	+	2	CDS	ENSMUSG00000019080	Mfsd3
517	15	76904852	76904856	5	+	4	CDS	ENSMUSG00000003970	Rpl8
518	15	76905877	76905885	9	+	22	CDS	ENSMUSG00000003970	Rpl8
519	15	78773233	78773233	1	-	6	CDS	ENSMUSG00000018169	Mfng
520	15	79531796	79531801	6	-	5	CDS	ENSMUSG00000055065	Ddx17
521	15	79737478	79737481	4	-	5	CDS	ENSMUSG00000042524	Sun2
522	15	79739007	79739008	2	-	5	CDS	ENSMUSG00000042524	Sun2
523	15	79906875	79906876	2	+	3	CDS	ENSMUSG00000009585	Apobec3
524	15	80081152	80081152	1	-	6	CDS	ENSMUSG00000060036	Rpl3
525	15	80929269	80929269	1	+	4	CDS	ENSMUSG00000047888	Tnrc6b
526	15	82178810	82178811	2	+	3	CDS	ENSMUSG00000022463	Srebf2
527	15	82194956	82194960	5	+	7	CDS	ENSMUSG00000022463	Srebf2
528	15	82203772	82203774	3	+	3	CDS	ENSMUSG00000022463	Srebf2
529	15	82354158	82354158	1	-	3	CDS	ENSMUSG00000022450	Ndufa6
530	15	82814575	82814575	1	-	3	CDS	ENSMUSG00000041852	Tcf20
531	15	82856756	82856756	1	-	3	CDS	ENSMUSG00000041852	Tcf20
532	15	83379081	83379081	1	-	3	CDS	ENSMUSG00000016664	Pacsin2
533	15	84207872	84207872	1	+	4	CDS	ENSMUSG00000022437	Samm50
534	15	85382927	85382930	4	+	3	CDS	ENSMUSG00000016541	Atxn10
535	15	86033152	86033152	1	-	4	CDS	ENSMUSG00000016028	Celsr1
536	15	89293621	89293621	1	-	4	CDS	ENSMUSG00000036529	Sbf1
537	15	90227750	90227750	1	+	3	CDS	ENSMUSG00000075470	Alg10b
538	15	90227846	90227878	33	+	11	CDS	ENSMUSG00000075470	Alg10b
539	15	90228092	90228096	5	+	6	CDS	ENSMUSG00000075470	Alg10b
540	15	90228120	90228120	1	+	3	CDS	ENSMUSG00000075470	Alg10b
541	15	92677685	92677686	2	+	2	CDS	ENSMUSG00000036218	Pdzrn4
542	15	96576799	96576803	5	-	5	CDS	ENSMUSG00000023169	Slc38a1
543	15	97793936	97793936	1	-	4	CDS	ENSMUSG00000022475	Hdac7
544	15	97808717	97808734	18	-	8	CDS	ENSMUSG00000022475	Hdac7
545	15	98906286	98906287	2	-	4	CDS	ENSMUSG00000022999	Lmbr1l
546	15	99406204	99406218	15	+	10	CDS	ENSMUSG00000023010	Tmbim6
547	15	99737591	99737595	5	-	4	CDS	ENSMUSG00000023021	Cers5
548	15	99946848	99946848	1	-	4	CDS	ENSMUSG00000045350	Fam186a
549	15	100644977	100644977	1	-	3	CDS	ENSMUSG00000098112	Bin2
550	15	102088694	102088694	1	+	4	CDS	ENSMUSG00000058655	Eif4b
551	15	102474144	102474145	2	+	3	CDS	ENSMUSG00000056851	Pcbp2
552	15	102498492	102498493	2	+	4	CDS	ENSMUSG00000056851	Pcbp2
553	15	102528862	102528863	2	-	7	CDS	ENSMUSG00000052414	Gm28047
554	15	102528998	102529000	3	-	6	CDS	ENSMUSG00000052414	Gm28047
555	15	103213076	103213078	3	-	4	CDS	ENSMUSG00000009575	Cbx5
556	15	103213126	103213126	1	-	3	CDS	ENSMUSG00000009575	Cbx5
557	15	103472773	103472773	1	+	3	CDS	ENSMUSG00000022488	Nckap1l
558	15	103474194	103474194	1	+	3	CDS	ENSMUSG00000022488	Nckap1l
559	16	4630232	4630234	3	-	3	CDS	ENSMUSG00000039637	Coro7
560	16	5064531	5064532	2	+	3	CDS	ENSMUSG00000039473	Ubn1
561	16	10511652	10511652	1	+	30	CDS	ENSMUSG00000022504	Ciita
562	16	10512348	10512348	1	+	3	CDS	ENSMUSG00000022504	Ciita
563	16	11153116	11153136	21	-	10	CDS	ENSMUSG00000037965	Zc3h7a
564	16	11196504	11196504	1	-	6	CDS	ENSMUSG00000005846	Rsl1d1
565	16	11220869	11220870	2	-	4	CDS	ENSMUSG00000062203	Gspt1
566	16	13412418	13412420	3	+	7	CDS	ENSMUSG00000009569	Mkl2
567	16	14185821	14185821	1	+	4	CDS	ENSMUSG00000022678	Nde1
568	16	15630321	15630322	2	-	3	CDS	ENSMUSG00000022673	Mcm4
569	16	15632196	15632196	1	-	3	CDS	ENSMUSG00000022673	Mcm4
570	16	15714222	15714223	2	+	3	CDS	ENSMUSG00000022672	Prkdc
571	16	16883459	16883459	1	+	3	CDS	ENSMUSG00000022779	Top3b
572	16	17038385	17038385	1	+	3	CDS	ENSMUSG00000063358	Mapk1
573	16	17141215	17141215	1	-	2	CDS	ENSMUSG00000022768	Ccdc116
574	16	17626665	17626668	4	+	4	CDS	ENSMUSG00000005899	Smpd4
575	16	18250651	18250652	2	+	4	CDS	ENSMUSG00000022721	Trmt2a
576	16	18927546	18927549	4	+	4	CDS	ENSMUSG00000022702	Hira
577	16	19195292	19195292	1	-	2	CDS	ENSMUSG00000106039	Iglc4
578	16	19198757	19198758	2	-	4	CDS	ENSMUSG00000076937	Iglc2
579	16	19241525	19241527	3	-	6	CDS	ENSMUSG00000076939	Iglv3
580	16	19260649	19260649	1	-	3	CDS	ENSMUSG00000076940	Iglv2
581	16	20674801	20674802	2	+	3	CDS	ENSMUSG00000045983	Eif4g1
582	16	20675776	20675776	1	+	3	CDS	ENSMUSG00000045983	Eif4g1
583	16	30333872	30333873	2	-	3	CDS	ENSMUSG00000022533	Atp13a3
584	16	30333922	30333922	1	-	3	CDS	ENSMUSG00000022533	Atp13a3
585	16	30349692	30349693	2	-	3	CDS	ENSMUSG00000022533	Atp13a3
586	16	32630141	32630142	2	+	4	CDS	ENSMUSG00000022797	Tfrc
587	16	32630186	32630187	2	+	3	CDS	ENSMUSG00000022797	Tfrc
588	16	32679636	32679636	1	+	3	CDS	ENSMUSG00000022791	Tnk2
589	16	33009236	33009236	1	+	5	CDS	ENSMUSG00000022801	Lrch3
590	16	33057499	33057505	7	+	3	CDS	ENSMUSG00000060636	Rpl35a
591	16	36824735	36824735	1	-	3	CDS	ENSMUSG00000022838	Eaf2
592	16	38582028	38582028	1	+	4	CDS	ENSMUSG00000002845	Tmem39a
593	16	38585184	38585185	2	+	5	CDS	ENSMUSG00000002845	Tmem39a
594	16	45239113	45239113	1	+	4	CDS	ENSMUSG00000052013	Btla
595	16	49896358	49896359	2	+	11	CDS	ENSMUSG00000055447	Cd47
596	16	55814280	55814282	3	-	3	CDS	ENSMUSG00000035356	Nfkbiz
597	16	57133208	57133209	2	+	4	CDS	ENSMUSG00000022752	Tomm70a
598	16	58732932	58732932	1	+	3	CDS	ENSMUSG00000022744	Cldnd1
599	16	64851540	64851544	5	-	79	CDS	ENSMUSG00000047141	Zfp654
600	16	78333392	78333392	1	+	3	CDS	ENSMUSG00000022865	Cxadr
601	16	87420264	87420264	1	-	5	CDS	ENSMUSG00000052299	Ltn1
602	16	87437497	87437497	1	-	3	CDS	ENSMUSG00000041079	Rwdd2b
603	16	87485606	87485608	3	-	3	CDS	ENSMUSG00000025613	Cct8
604	16	87490498	87490501	4	-	3	CDS	ENSMUSG00000025613	Cct8
605	16	90800086	90800086	1	-	3	CDS	ENSMUSG00000039929	Urb1
606	16	91630133	91630133	1	-	3	CDS	ENSMUSG00000022962	Gart
607	16	92689007	92689007	1	-	3	CDS	ENSMUSG00000022952	Runx1
608	17	5337189	5337189	1	+	3	CDS	ENSMUSG00000069729	Arid1b
609	17	5342616	5342616	1	+	3	CDS	ENSMUSG00000069729	Arid1b
610	17	8801299	8801299	1	+	5	CDS	ENSMUSG00000023868	Pde10a
611	17	12920775	12920777	3	+	3	CDS	ENSMUSG00000068039	Tcp1
612	17	15742164	15742164	1	+	2	CDS	ENSMUSG00000023852	Chd1
613	17	15770020	15770020	1	+	2	CDS	ENSMUSG00000023852	Chd1
614	17	23817716	23817717	2	+	7	CDS	ENSMUSG00000039218	Srrm2
615	17	23818194	23818194	1	+	3	CDS	ENSMUSG00000039218	Srrm2
616	17	23820477	23820479	3	+	3	CDS	ENSMUSG00000039218	Srrm2
617	17	23820789	23820789	1	+	3	CDS	ENSMUSG00000039218	Srrm2
618	17	23821151	23821152	2	+	3	CDS	ENSMUSG00000039218	Srrm2
619	17	23821232	23821236	5	+	9	CDS	ENSMUSG00000039218	Srrm2
620	17	23821262	23821287	26	+	35	CDS	ENSMUSG00000039218	Srrm2
621	17	23821323	23821326	4	+	9	CDS	ENSMUSG00000039218	Srrm2
622	17	23821439	23821439	1	+	3	CDS	ENSMUSG00000039218	Srrm2
623	17	23821560	23821560	1	+	3	CDS	ENSMUSG00000039218	Srrm2
624	17	23821602	23821606	5	+	3	CDS	ENSMUSG00000039218	Srrm2
625	17	23822515	23822607	93	+	124	CDS	ENSMUSG00000039218	Srrm2
626	17	24445946	24445946	1	-	5	CDS	ENSMUSG00000024137	E4f1
627	17	24512031	24512031	1	-	4	CDS	ENSMUSG00000052752	Traf7
628	17	24567696	24567697	2	+	3	CDS	ENSMUSG00000032855	Pkd1
629	17	24568824	24568825	2	+	4	CDS	ENSMUSG00000032855	Pkd1
630	17	24695384	24695384	1	-	3	CDS	ENSMUSG00000040888	Gfer
631	17	24721635	24721661	27	+	20	CDS	ENSMUSG00000044533	Rps2
632	17	25205661	25205663	3	+	18	CDS	ENSMUSG00000015127	Unkl
633	17	25367212	25367212	1	+	2	CDS	ENSMUSG00000033825	Tpsb2
634	17	27117299	27117301	3	+	4	CDS	ENSMUSG00000042644	Itpr3
635	17	29494647	29494647	1	+	4	CDS	ENSMUSG00000024014	Pim1
636	17	32201006	32201008	3	-	5	CDS	ENSMUSG00000024002	Brd4
637	17	32213670	32213670	1	-	3	CDS	ENSMUSG00000024002	Brd4
638	17	32316342	32316342	1	-	5	CDS	ENSMUSG00000024045	Akap8
639	17	32882877	32882877	1	-	2	CDS	ENSMUSG00000095325	Zfp870
640	17	32883181	32883181	1	-	2	CDS	ENSMUSG00000095325	Zfp870
641	17	33663257	33663257	1	-	3	CDS	ENSMUSG00000059208	Hnrnpm
642	17	33950472	33950472	1	-	2	CDS	ENSMUSG00000067370	B3galt4
643	17	34028828	34028829	2	-	4	CDS	ENSMUSG00000024327	Slc39a7
644	17	34116633	34116634	2	-	3	CDS	ENSMUSG00000024335	Brd2
645	17	34147904	34147908	5	+	11	CDS	ENSMUSG00000037548	H2-DMb2
646	17	34190731	34190732	2	+	6	CDS	ENSMUSG00000037321	Tap1
647	17	34283178	34283181	4	-	19	CDS	ENSMUSG00000036594	H2-Aa
648	17	34283641	34283646	6	-	7	CDS	ENSMUSG00000036594	H2-Aa
649	17	34283675	34283680	6	-	6	CDS	ENSMUSG00000036594	H2-Aa
650	17	34283814	34283816	3	-	5	CDS	ENSMUSG00000036594	H2-Aa
651	17	34859982	34859983	2	-	63	CDS	ENSMUSG00000092511	Gm20547
652	17	35001453	35001453	1	+	4	CDS	ENSMUSG00000007029	Vars
653	17	35011312	35011312	1	+	7	CDS	ENSMUSG00000007029	Vars
654	17	35094298	35094298	1	+	3	CDS	ENSMUSG00000007036	Abhd16a
655	17	35101296	35101296	1	+	3	CDS	ENSMUSG00000007036	Abhd16a
656	17	35150078	35150078	1	-	4	CDS	ENSMUSG00000024393	Prrc2a
657	17	35150248	35150253	6	-	4	CDS	ENSMUSG00000024393	Prrc2a
658	17	35150521	35150522	2	-	7	CDS	ENSMUSG00000024393	Prrc2a
659	17	35150571	35150571	1	-	3	CDS	ENSMUSG00000024393	Prrc2a
660	17	35150618	35150623	6	-	6	CDS	ENSMUSG00000024393	Prrc2a
661	17	35528893	35528893	1	+	3	CDS	ENSMUSG00000040312	Cchcr1
662	17	35835010	35835013	4	-	5	CDS	ENSMUSG00000001525	Tubb5
663	17	35836198	35836200	3	-	7	CDS	ENSMUSG00000001525	Tubb5
664	17	35868764	35868764	1	+	4	CDS	ENSMUSG00000034595	Ppp1r18
665	17	45562007	45562014	8	+	8	CDS	ENSMUSG00000023947	Nfkbie
666	17	45569744	45569747	4	-	4	CDS	ENSMUSG00000023944	Hsp90ab1
667	17	45571797	45571818	22	-	11	CDS	ENSMUSG00000023944	Hsp90ab1
668	17	46153496	46153496	1	-	13	CDS	ENSMUSG00000034509	Mad2l1bp
669	17	46251188	46251190	3	+	3	CDS	ENSMUSG00000071074	Yipf3
670	17	46676798	46676800	3	-	4	CDS	ENSMUSG00000063576	Klhdc3
671	17	46684751	46684751	1	-	3	CDS	ENSMUSG00000059409	Ppp2r5d
672	17	50107119	50107119	1	-	3	CDS	ENSMUSG00000039316	Rftn1
673	17	51809063	51809064	2	-	4	CDS	ENSMUSG00000023927	Satb1
674	17	56017571	56017571	1	-	3	CDS	ENSMUSG00000003200	Sh3gl1
675	17	56177741	56177741	1	-	2	CDS	ENSMUSG00000019579	Mydgf
676	17	56191112	56191112	1	-	3	CDS	ENSMUSG00000001229	Dpp9
677	17	56205530	56205532	3	-	3	CDS	ENSMUSG00000001229	Dpp9
678	17	56620237	56620237	1	-	3	CDS	ENSMUSG00000041168	Lonp1
679	17	56846334	56846335	2	-	6	CDS	ENSMUSG00000024207	Acsbg2
680	17	57022770	57022777	8	-	6	CDS	ENSMUSG00000007670	Khsrp
681	17	57419338	57419338	1	+	2	CDS	ENSMUSG00000004730	Adgre1
682	17	63490814	63490814	1	-	3	CDS	ENSMUSG00000023965	Fbxl17
683	17	66119070	66119070	1	+	7	CDS	ENSMUSG00000024101	Washc1
684	17	71638381	71638381	1	+	3	CDS	ENSMUSG00000041057	Wdr43
685	17	71648818	71648818	1	+	3	CDS	ENSMUSG00000041057	Wdr43
686	17	72921281	72921281	1	+	3	CDS	ENSMUSG00000024063	Lbh
687	17	74562074	74562074	1	+	3	CDS	ENSMUSG00000024073	Birc6
688	17	74604531	74604532	2	+	3	CDS	ENSMUSG00000024073	Birc6
689	17	74639988	74639989	2	+	5	CDS	ENSMUSG00000024073	Birc6
690	17	74660580	74660585	6	+	4	CDS	ENSMUSG00000024073	Birc6
691	17	80251247	80251247	1	-	3	CDS	ENSMUSG00000035051	Dhx57
692	18	6223989	6223989	1	-	3	CDS	ENSMUSG00000006740	Kif5b
693	18	7916218	7916220	3	+	4	CDS	ENSMUSG00000024283	Wac
694	18	10812079	10812079	1	+	3	CDS	ENSMUSG00000024294	Mib1
695	18	15833301	15833302	2	+	2	CDS	ENSMUSG00000058064	Gm10036
696	18	20895994	20895995	2	-	3	CDS	ENSMUSG00000033382	Trappc8
697	18	23832875	23832875	1	+	3	CDS	ENSMUSG00000024277	Mapre2
698	18	32426304	32426307	4	+	5	CDS	ENSMUSG00000024381	Bin1
699	18	34602217	34602219	3	-	3	CDS	ENSMUSG00000003778	Brd8
700	18	34611166	34611166	1	-	3	CDS	ENSMUSG00000003778	Brd8
701	18	34628468	34628470	3	+	5	CDS	ENSMUSG00000003779	Kif20a
702	18	34632585	34632585	1	+	3	CDS	ENSMUSG00000003779	Kif20a
703	18	36658023	36658023	1	+	3	CDS	ENSMUSG00000024483	Ankhd1
704	18	36661013	36661013	1	+	3	CDS	ENSMUSG00000024483	Ankhd1
705	18	37890935	37890936	2	-	4	CDS	ENSMUSG00000024456	Diaph1
706	18	46588493	46588496	4	-	5	CDS	ENSMUSG00000033184	Tmed7
707	18	49864600	49864604	5	+	3	CDS	ENSMUSG00000037416	Dmxl1
708	18	49878004	49878004	1	+	3	CDS	ENSMUSG00000037416	Dmxl1
709	18	50046883	50046887	5	+	3	CDS	ENSMUSG00000062210	Tnfaip8
710	18	52694409	52694411	3	+	15	CDS	ENSMUSG00000053624	Gykl1
711	18	60777857	60777861	5	+	6	CDS	ENSMUSG00000024608	Rps14
712	18	60807982	60807991	10	+	13	CDS	ENSMUSG00000024610	Cd74
713	18	60808025	60808027	3	+	6	CDS	ENSMUSG00000024610	Cd74
714	18	60811880	60811885	6	+	5	CDS	ENSMUSG00000024610	Cd74
715	18	64503597	64503617	21	-	7	CDS	ENSMUSG00000024587	Nars
716	18	64511648	64511651	4	-	3	CDS	ENSMUSG00000024587	Nars
717	18	65809460	65809468	9	+	10	CDS	ENSMUSG00000024516	Sec11c
718	18	69994485	69994485	1	-	5	CDS	ENSMUSG00000024511	Rab27b
719	18	73590319	73590320	2	+	3	CDS	ENSMUSG00000037253	Mex3c
720	18	77780226	77780227	2	+	7	CDS	ENSMUSG00000025428	Atp5a1
721	19	3941572	3941573	2	+	4	CDS	ENSMUSG00000036908	Unc93b1
722	19	3943659	3943662	4	+	8	CDS	ENSMUSG00000036908	Unc93b1
723	19	3943688	3943704	17	+	9	CDS	ENSMUSG00000036908	Unc93b1
724	19	3944192	3944192	1	+	4	CDS	ENSMUSG00000036908	Unc93b1
725	19	4286058	4286075	18	-	16	CDS	ENSMUSG00000024858	Grk2
726	19	4803081	4803081	1	-	4	CDS	ENSMUSG00000096370	Gm21992
727	19	4803401	4803401	1	-	3	CDS	ENSMUSG00000096370	Gm21992
728	19	4963625	4963625	1	+	2	CDS	ENSMUSG00000024902	Mrpl11
729	19	5143808	5143809	2	-	3	CDS	ENSMUSG00000024855	Pacs1
730	19	5283890	5283890	1	-	3	CDS	ENSMUSG00000024853	Sf3b2
731	19	5493552	5493569	18	+	8	CDS	ENSMUSG00000056201	Cfl1
732	19	5493663	5493666	4	+	11	CDS	ENSMUSG00000056201	Cfl1
733	19	5673503	5673504	2	-	3	CDS	ENSMUSG00000054874	Pcnx3
734	19	5679453	5679454	2	-	3	CDS	ENSMUSG00000054874	Pcnx3
735	19	5679592	5679593	2	-	7	CDS	ENSMUSG00000054874	Pcnx3
736	19	6049778	6049802	25	+	24	CDS	ENSMUSG00000024807	Syvn1
737	19	6343110	6343110	1	+	3	CDS	ENSMUSG00000024948	Map4k2
738	19	7435044	7435044	1	-	6	CDS	ENSMUSG00000024758	Rtn3
739	19	7435090	7435092	3	-	7	CDS	ENSMUSG00000024758	Rtn3
740	19	7467850	7467862	13	-	17	CDS	ENSMUSG00000024758	Rtn3
741	19	7532327	7532327	1	+	3	CDS	ENSMUSG00000024759	Atl3
742	19	8765151	8765275	125	+	84	CDS	ENSMUSG00000010097	Nxf1
743	19	8773372	8773376	5	-	11	CDS	ENSMUSG00000003680	Taf6l
744	19	8773539	8773541	3	-	3	CDS	ENSMUSG00000003680	Taf6l
745	19	8773603	8773603	1	-	3	CDS	ENSMUSG00000003680	Taf6l
746	19	8902312	8902312	1	+	3	CDS	ENSMUSG00000071650	Ganab
747	19	8911935	8911938	4	+	4	CDS	ENSMUSG00000071650	Ganab
748	19	8972936	8972936	1	+	4	CDS	ENSMUSG00000071644	Eef1g
749	19	9982869	9982870	2	+	5	CDS	ENSMUSG00000024661	Fth1
750	19	9984185	9984193	9	+	11	CDS	ENSMUSG00000024661	Fth1
751	19	9984658	9984664	7	+	5	CDS	ENSMUSG00000024661	Fth1
752	19	9984782	9984810	29	+	24	CDS	ENSMUSG00000024661	Fth1
753	19	9984895	9984905	11	+	12	CDS	ENSMUSG00000024661	Fth1
754	19	10207237	10207239	3	+	4	CDS	ENSMUSG00000036372	Tmem258
755	19	10571209	10571210	2	-	3	CDS	ENSMUSG00000024666	Tmem138
756	19	10585302	10585302	1	+	12	CDS	ENSMUSG00000034445	Cyb561a3
757	19	10585378	10585380	3	+	4	CDS	ENSMUSG00000034445	Cyb561a3
758	19	10586704	10586713	10	+	9	CDS	ENSMUSG00000034445	Cyb561a3
759	19	10586773	10586773	1	+	5	CDS	ENSMUSG00000034445	Cyb561a3
760	19	10586834	10586834	1	+	5	CDS	ENSMUSG00000034445	Cyb561a3
761	19	10611653	10611656	4	+	4	CDS	ENSMUSG00000024740	Ddb1
762	19	10623565	10623569	5	+	5	CDS	ENSMUSG00000024740	Ddb1
763	19	10625325	10625328	4	+	4	CDS	ENSMUSG00000024740	Ddb1
764	19	10895452	10895453	2	+	4	CDS	ENSMUSG00000024735	Prpf19
765	19	11253236	11253241	6	-	3	CDS	ENSMUSG00000024673	Ms4a1
766	19	11254654	11254666	13	-	10	CDS	ENSMUSG00000024673	Ms4a1
767	19	12588343	12588343	1	+	3	CDS	ENSMUSG00000024691	Fam111a
768	19	14516359	14516359	1	-	3	CDS	ENSMUSG00000024642	Tle4
769	19	16752152	16752152	1	-	3	CDS	ENSMUSG00000046230	Vps13a
770	19	21678642	21678643	2	+	3	CDS	ENSMUSG00000047368	Abhd17b
771	19	24477293	24477296	4	-	8	CDS	ENSMUSG00000024867	Pip5k1b
772	19	27867599	27867600	2	-	4	CDS	ENSMUSG00000040929	Rfx3
773	19	29586589	29586589	1	+	3	CDS	ENSMUSG00000038658	Ric1
774	19	29595602	29595603	2	+	3	CDS	ENSMUSG00000038658	Ric1
775	19	29632457	29632457	1	-	4	CDS	ENSMUSG00000046324	Ermp1
776	19	32698559	32698560	2	-	4	CDS	ENSMUSG00000013662	Atad1
777	19	36872454	36872454	1	+	3	CDS	ENSMUSG00000024811	Tnks2
778	19	37390812	37390812	1	+	3	CDS	ENSMUSG00000012443	Kif11
779	19	37937910	37937910	1	-	2	CDS	ENSMUSG00000048612	Myof
780	19	37939864	37939864	1	-	2	CDS	ENSMUSG00000048612	Myof
781	19	38943804	38943806	3	+	3	CDS	ENSMUSG00000025001	Hells
782	19	41217413	41217414	2	-	4	CDS	ENSMUSG00000025016	Tm9sf3
783	19	41218304	41218305	2	-	4	CDS	ENSMUSG00000025016	Tm9sf3
784	19	41939645	41939646	2	+	4	CDS	ENSMUSG00000025157	Zdhhc16
785	19	41945618	41945618	1	-	3	CDS	ENSMUSG00000025159	Mms19
786	19	44295126	44295126	1	+	4	CDS	ENSMUSG00000025203	Scd2
787	19	44299699	44299700	2	+	6	CDS	ENSMUSG00000025203	Scd2
788	19	44301423	44301424	2	+	5	CDS	ENSMUSG00000025203	Scd2
789	19	44552742	44552743	2	-	4	CDS	ENSMUSG00000025204	Ndufb8
790	19	45765463	45765466	4	-	12	CDS	ENSMUSG00000025220	Mgea5
791	19	46034007	46034016	10	-	10	CDS	ENSMUSG00000025223	Ldb1
792	19	46262493	46262494	2	+	3	CDS	ENSMUSG00000025224	Gbf1
793	19	46382391	46382391	1	-	3	CDS	ENSMUSG00000025228	Actr1a
794	19	57040542	57040542	1	-	3	CDS	ENSMUSG00000025085	Ablim1
795	19	57068219	57068219	1	-	4	CDS	ENSMUSG00000025085	Ablim1
796	19	57777896	57777896	1	+	2	CDS	ENSMUSG00000054843	Atrnl1
797	19	60766455	60766455	1	-	3	CDS	ENSMUSG00000024991	Eif3a
798	19	60773996	60773996	1	-	3	CDS	ENSMUSG00000024991	Eif3a
799	2	6553806	6553806	1	-	2	CDS	ENSMUSG00000002107	Celf2
800	2	6721488	6721488	1	-	2	CDS	ENSMUSG00000002107	Celf2
801	2	12405900	12405900	1	-	5	CDS	ENSMUSG00000026767	Mindy3
802	2	13580643	13580644	2	+	4	CDS	ENSMUSG00000026728	Vim
803	2	18027018	18027018	1	-	3	CDS	ENSMUSG00000054057	A930004D18Rik
804	2	22950267	22950269	3	-	3	CDS	ENSMUSG00000058835	Abi1
805	2	23164507	23164507	1	+	3	CDS	ENSMUSG00000026775	Yme1l1
806	2	24397231	24397231	1	+	3	CDS	ENSMUSG00000026979	Psd4
807	2	25203152	25203152	1	-	4	CDS	ENSMUSG00000013465	Nelfb
808	2	25262859	25262859	1	+	2	CDS	ENSMUSG00000048707	Tprn
809	2	25565546	25565547	2	-	3	CDS	ENSMUSG00000026941	Mamdc4
810	2	26438509	26438509	1	-	3	CDS	ENSMUSG00000026924	Sec16a
811	2	26439598	26439598	1	-	3	CDS	ENSMUSG00000026924	Sec16a
812	2	27021924	27021924	1	-	3	CDS	ENSMUSG00000036067	Slc2a6
813	2	28845207	28845207	1	+	3	CDS	ENSMUSG00000026806	Ddx31
814	2	29710174	29710186	13	+	8	CDS	ENSMUSG00000039844	Rapgef1
815	2	29719659	29719663	5	+	3	CDS	ENSMUSG00000039844	Rapgef1
816	2	29719838	29719838	1	+	4	CDS	ENSMUSG00000039844	Rapgef1
817	2	30298469	30298469	1	+	3	CDS	ENSMUSG00000052533	Nup188
818	2	31044894	31044894	1	-	3	CDS	ENSMUSG00000075415	Fnbp1
819	2	31054054	31054054	1	-	3	CDS	ENSMUSG00000075415	Fnbp1
820	2	31183616	31183619	4	+	5	CDS	ENSMUSG00000000194	Gpr107
821	2	31834323	31834327	5	-	29	CDS	ENSMUSG00000026841	Fibcd1
822	2	31994780	31994781	2	+	3	CDS	ENSMUSG00000001855	Nup214
823	2	35189974	35189976	3	-	4	CDS	ENSMUSG00000026878	Rab14
824	2	37584029	37584032	4	-	3	CDS	ENSMUSG00000026915	Strbp
825	2	37627465	37627465	1	-	3	CDS	ENSMUSG00000026915	Strbp
826	2	39197342	39197345	4	-	3	CDS	ENSMUSG00000026753	Ppp6c
827	2	44996556	44996557	2	-	3	CDS	ENSMUSG00000026872	Zeb2
828	2	52736239	52736239	1	-	5	CDS	ENSMUSG00000055371	Stam2
829	2	53139248	53139248	1	-	4	CDS	ENSMUSG00000061136	Prpf40a
830	2	61649923	61649924	2	+	4	CDS	ENSMUSG00000064289	Tank
831	2	61653383	61653384	2	+	3	CDS	ENSMUSG00000064289	Tank
832	2	63980141	63980142	2	-	26	CDS	ENSMUSG00000075324	Fign
833	2	65764443	65764450	8	+	10	CDS	ENSMUSG00000075318	Scn2a
834	2	68471755	68471756	2	-	3	CDS	ENSMUSG00000027030	Stk39
835	2	68471803	68471806	4	-	7	CDS	ENSMUSG00000027030	Stk39
836	2	69953534	69953534	1	+	3	CDS	ENSMUSG00000044308	Ubr3
837	2	70661494	70661498	5	-	113	CDS	ENSMUSG00000097025	Gm26558
838	2	70689193	70689196	4	+	16	CDS	ENSMUSG00000014959	Gorasp2
839	2	70689242	70689243	2	+	3	CDS	ENSMUSG00000014959	Gorasp2
840	2	71333700	71333701	2	-	3	CDS	ENSMUSG00000027010	Slc25a12
841	2	71827899	71827900	2	+	2	CDS	ENSMUSG00000027111	Itga6
842	2	73273685	73273685	1	+	3	CDS	ENSMUSG00000068859	Sp9
843	2	73845468	73845468	1	-	3	CDS	ENSMUSG00000027104	Atf2
844	2	73908633	73908635	3	-	6	CDS	ENSMUSG00000018770	Atp5g3
845	2	84694681	84694682	2	-	3	CDS	ENSMUSG00000034075	Zdhhc5
846	2	84702360	84702360	1	-	3	CDS	ENSMUSG00000034075	Zdhhc5
847	2	91177963	91177964	2	-	3	CDS	ENSMUSG00000040687	Madd
848	2	91767094	91767095	2	+	3	CDS	ENSMUSG00000040506	Ambra1
849	2	91767728	91767728	1	+	3	CDS	ENSMUSG00000040506	Ambra1
850	2	92328340	92328340	1	+	5	CDS	ENSMUSG00000058318	Phf21a
851	2	92384744	92384744	1	-	3	CDS	ENSMUSG00000027223	Mapk8ip1
852	2	93430009	93430018	10	-	5	CDS	ENSMUSG00000027215	Cd82
853	2	102853036	102853038	3	-	4	CDS	ENSMUSG00000005087	Cd44
854	2	102901312	102901312	1	-	3	CDS	ENSMUSG00000005087	Cd44
855	2	103752699	103752699	1	-	3	CDS	ENSMUSG00000027185	Nat10
856	2	104114171	104114172	2	+	3	CDS	ENSMUSG00000032679	Cd59a
857	2	112462890	112462890	1	+	3	CDS	ENSMUSG00000055943	Emc7
858	2	119072436	119072436	1	+	3	CDS	ENSMUSG00000027326	Knl1
859	2	119118676	119118677	2	+	3	CDS	ENSMUSG00000027323	Rad51
860	2	119767619	119767620	2	-	3	CDS	ENSMUSG00000034032	Rpap1
861	2	119921753	119921756	4	+	3	CDS	ENSMUSG00000033943	Mga
862	2	120373936	120373942	7	-	8	CDS	ENSMUSG00000033808	Tmem87a
863	2	120374543	120374546	4	-	3	CDS	ENSMUSG00000033808	Tmem87a
864	2	121007000	121007000	1	+	4	CDS	ENSMUSG00000054484	Tmem62
865	2	121138747	121138748	2	-	4	CDS	ENSMUSG00000074890	Lcmt2
866	2	121155543	121155544	2	+	5	CDS	ENSMUSG00000027259	Adal
867	2	121434898	121434898	1	+	3	CDS	ENSMUSG00000027248	Pdia3
868	2	121458226	121458228	3	+	4	CDS	ENSMUSG00000074884	Serf2
869	2	122147763	122147766	4	+	8	CDS	ENSMUSG00000060802	B2m
870	2	122151049	122151051	3	+	8	CDS	ENSMUSG00000060802	B2m
871	2	125834794	125834794	1	-	3	CDS	ENSMUSG00000027206	Cops2
872	2	127284360	127284360	1	+	3	CDS	ENSMUSG00000027367	Stard7
873	2	128628506	128628513	8	-	9	CDS	ENSMUSG00000014355	Anapc1
874	2	128628639	128628640	2	-	3	CDS	ENSMUSG00000014355	Anapc1
875	2	128659854	128659855	2	-	6	CDS	ENSMUSG00000014355	Anapc1
876	2	129108095	129108095	1	+	3	CDS	ENSMUSG00000027395	Polr1b
877	2	130540563	130540564	2	+	5	CDS	ENSMUSG00000027303	Ptpra
878	2	130663356	130663356	1	-	3	CDS	ENSMUSG00000068290	Ddrgk1
879	2	131178201	131178204	4	-	3	CDS	ENSMUSG00000027329	Spef1
880	2	131274052	131274053	2	+	3	CDS	ENSMUSG00000037514	Pank2
881	2	132300557	132300557	1	+	3	CDS	ENSMUSG00000058793	Cds2
882	2	132530617	132530617	1	-	3	CDS	ENSMUSG00000027346	Gpcpd1
883	2	144394232	144394232	1	+	5	CDS	ENSMUSG00000027425	Kat14
884	2	145928140	145928141	2	-	4	CDS	ENSMUSG00000001767	Crnkl1
885	2	146222802	146222804	3	+	21	CDS	ENSMUSG00000068154	Insm1
886	2	146418380	146418380	1	-	3	CDS	ENSMUSG00000037110	Ralgapa2
887	2	147063357	147063357	1	+	4	CDS	ENSMUSG00000027433	Xrn2
888	2	152308109	152308110	2	+	4	CDS	ENSMUSG00000027465	Tbc1d20
889	2	152669725	152669727	3	+	4	CDS	ENSMUSG00000019188	H13
890	2	152681079	152681097	19	+	6	CDS	ENSMUSG00000019188	H13
891	2	152686226	152686228	3	+	3	CDS	ENSMUSG00000019188	H13
892	2	153397885	153397886	2	+	5	CDS	ENSMUSG00000042548	Asxl1
893	2	156123840	156123850	11	-	8	CDS	ENSMUSG00000098950	Gm28036
894	2	156938569	156938569	1	-	4	CDS	ENSMUSG00000027634	Ndrg3
895	2	157029577	157029577	1	-	4	CDS	ENSMUSG00000055485	Soga1
896	2	158007810	158007810	1	-	3	CDS	ENSMUSG00000027650	Tti1
897	2	163625495	163625501	7	-	9	CDS	ENSMUSG00000017707	Serinc3
898	2	163626311	163626317	7	-	12	CDS	ENSMUSG00000017707	Serinc3
899	2	163627896	163627896	1	-	4	CDS	ENSMUSG00000017707	Serinc3
900	2	163627921	163627932	12	-	8	CDS	ENSMUSG00000017707	Serinc3
901	2	163628005	163628006	2	-	4	CDS	ENSMUSG00000017707	Serinc3
902	2	163631030	163631095	66	-	39	CDS	ENSMUSG00000017707	Serinc3
903	2	163632201	163632237	37	-	34	CDS	ENSMUSG00000017707	Serinc3
904	2	163634443	163634465	23	-	16	CDS	ENSMUSG00000017707	Serinc3
905	2	163636877	163636899	23	-	32	CDS	ENSMUSG00000017707	Serinc3
906	2	163639213	163639238	26	-	16	CDS	ENSMUSG00000017707	Serinc3
907	2	164771884	164771884	1	+	3	CDS	ENSMUSG00000001403	Ube2c
908	2	165277511	165277511	1	-	3	CDS	ENSMUSG00000017664	Slc35c2
909	2	165291770	165291772	3	-	3	CDS	ENSMUSG00000017670	Elmo2
910	2	166934831	166934831	1	+	3	CDS	ENSMUSG00000002718	Cse1l
911	2	166935974	166935976	3	+	3	CDS	ENSMUSG00000002718	Cse1l
912	2	166941283	166941284	2	+	3	CDS	ENSMUSG00000002718	Cse1l
913	2	167306601	167306601	1	-	3	CDS	ENSMUSG00000017929	B4galt5
914	2	167507048	167507049	2	+	3	CDS	ENSMUSG00000006418	Rnf114
915	2	167510885	167510885	1	+	3	CDS	ENSMUSG00000006418	Rnf114
916	2	168182700	168182700	1	-	3	CDS	ENSMUSG00000093752	Gm20716
917	2	168184242	168184242	1	-	3	CDS	ENSMUSG00000093752	Gm20716
918	2	168185154	168185154	1	-	4	CDS	ENSMUSG00000051149	Adnp
919	2	172042293	172042294	2	-	2	CDS	ENSMUSG00000067578	Cbln4
920	2	180036485	180036485	1	-	4	CDS	ENSMUSG00000027566	Psma7
921	2	180100798	180100798	1	-	2	CDS	ENSMUSG00000039059	Hrh3
922	2	181232008	181232009	2	-	3	CDS	ENSMUSG00000027580	Helz2
923	2	181991282	181991282	1	+	2	CDS	ENSMUSG00000098505	Gm14496
924	3	10316080	10316080	1	-	3	CDS	ENSMUSG00000027531	Impa1
925	3	20064576	20064577	2	+	5	CDS	ENSMUSG00000002428	Hltf
926	3	27117814	27117814	1	-	3	CDS	ENSMUSG00000027699	Ect2
927	3	27127801	27127801	1	-	3	CDS	ENSMUSG00000027699	Ect2
928	3	32744937	32744937	1	+	3	CDS	ENSMUSG00000027673	Ndufb5
929	3	34046287	34046288	2	+	7	CDS	ENSMUSG00000027680	Fxr1
930	3	36874225	36874227	3	+	3	CDS	ENSMUSG00000037270	4932438A13Rik
931	3	36875452	36875455	4	+	6	CDS	ENSMUSG00000037270	4932438A13Rik
932	3	37431839	37431839	1	+	3	CDS	ENSMUSG00000027722	Spata5
933	3	51266041	51266042	2	-	3	CDS	ENSMUSG00000037174	Elf2
934	3	51532988	51532988	1	-	3	CDS	ENSMUSG00000037111	Setd7
935	3	55117677	55117679	3	+	3	CDS	ENSMUSG00000036580	Spg20
936	3	58586029	58586030	2	+	3	CDS	ENSMUSG00000075700	Selenot
937	3	58588527	58588528	2	+	3	CDS	ENSMUSG00000075700	Selenot
938	3	60614728	60614728	1	+	3	CDS	ENSMUSG00000027763	Mbnl1
939	3	63963805	63963808	4	-	3	CDS	ENSMUSG00000027822	Slc33a1
940	3	63963860	63963860	1	-	3	CDS	ENSMUSG00000027822	Slc33a1
941	3	65383019	65383022	4	-	4	CDS	ENSMUSG00000027828	Ssr3
942	3	69034007	69034010	4	+	3	CDS	ENSMUSG00000034349	Smc4
943	3	79886307	79886307	1	+	2	CDS	ENSMUSG00000027955	Fam198b
944	3	81932687	81932687	1	+	3	CDS	ENSMUSG00000028015	Ctso
945	3	83961529	83961529	1	-	3	CDS	ENSMUSG00000033767	Tmem131l
946	3	86351921	86351921	1	+	3	CDS	ENSMUSG00000028080	Lrba
947	3	87385061	87385064	4	+	5	CDS	ENSMUSG00000059994	Fcrl1
948	3	87443748	87443750	3	+	5	CDS	ENSMUSG00000048031	Fcrl5
949	3	87913143	87913145	3	+	9	CDS	ENSMUSG00000004897	Hdgf
950	3	88643997	88643997	1	+	3	CDS	ENSMUSG00000028059	Arhgef2
951	3	88982761	88982761	1	+	5	CDS	ENSMUSG00000028053	Ash1l
952	3	88984175	88984175	1	+	4	CDS	ENSMUSG00000028053	Ash1l
953	3	88984271	88984272	2	+	3	CDS	ENSMUSG00000028053	Ash1l
954	3	88985396	88985397	2	+	5	CDS	ENSMUSG00000028053	Ash1l
955	3	89094889	89094892	4	-	3	CDS	ENSMUSG00000105204	Gm43738
956	3	89249100	89249101	2	+	5	CDS	ENSMUSG00000042747	Krtcap2
957	3	89249569	89249572	4	+	5	CDS	ENSMUSG00000042747	Krtcap2
958	3	89269150	89269150	1	-	3	CDS	ENSMUSG00000027953	Slc50a1
959	3	90490203	90490203	1	-	3	CDS	ENSMUSG00000001018	Snapin
960	3	95322390	95322391	2	+	3	CDS	ENSMUSG00000015714	Cers2
961	3	95474641	95474641	1	+	3	CDS	ENSMUSG00000015522	Arnt
962	3	96269796	96269796	1	+	3	CDS	ENSMUSG00000050936	Gm42743
963	3	96558948	96558951	4	+	5	CDS	ENSMUSG00000038393	Txnip
964	3	97561044	97561044	1	-	3	CDS	ENSMUSG00000028089	Chd1l
965	3	97758890	97758890	1	-	3	CDS	ENSMUSG00000038170	Pde4dip
966	3	100202135	100202135	1	+	4	CDS	ENSMUSG00000027865	Gdap2
967	3	100684692	100684692	1	-	4	CDS	ENSMUSG00000008763	Man1a2
968	3	101590550	101590557	8	-	5	CDS	ENSMUSG00000033161	Atp1a1
969	3	104649381	104649381	1	+	3	CDS	ENSMUSG00000032902	Slc16a1
970	3	104653421	104653421	1	+	4	CDS	ENSMUSG00000032902	Slc16a1
971	3	105967279	105967279	1	+	5	CDS	ENSMUSG00000000561	Wdr77
972	3	106767993	106767997	5	-	5	CDS	ENSMUSG00000040747	Cd53
973	3	115712462	115712462	1	-	4	CDS	ENSMUSG00000045092	S1pr1
974	3	116647869	116647869	1	-	3	CDS	ENSMUSG00000105103	Gm43191
975	3	123358927	123358927	1	+	5	CDS	ENSMUSG00000039234	Sec24d
976	3	130703387	130703387	1	-	3	CDS	ENSMUSG00000041084	Ostc
977	3	135589344	135589345	2	-	3	CDS	ENSMUSG00000028163	Nfkb1
978	3	135858137	135858137	1	+	2	CDS	ENSMUSG00000053897	Slc39a8
979	3	152740781	152740781	1	+	2	CDS	ENSMUSG00000039047	Pigk
980	4	3569611	3569614	4	-	3	CDS	ENSMUSG00000028232	Tmem68
981	4	8866559	8866559	1	+	3	CDS	ENSMUSG00000041235	Chd7
982	4	10990662	10990662	1	-	3	CDS	ENSMUSG00000049969	Plekhf2
983	4	11199346	11199350	5	+	3	CDS	ENSMUSG00000028212	Ccne2
984	4	11526640	11526641	2	+	3	CDS	ENSMUSG00000040720	Virma
985	4	11526866	11526870	5	+	6	CDS	ENSMUSG00000040720	Virma
986	4	11527057	11527057	1	+	3	CDS	ENSMUSG00000040720	Virma
987	4	21678967	21678968	2	-	4	CDS	ENSMUSG00000040478	Prdm13
988	4	32691187	32691187	1	+	4	CDS	ENSMUSG00000058006	Mdn1
989	4	32725938	32725938	1	+	3	CDS	ENSMUSG00000058006	Mdn1
990	4	40823652	40823653	2	-	3	CDS	ENSMUSG00000028413	B4galt1
991	4	40960899	40960901	3	+	3	CDS	ENSMUSG00000028419	Chmp5
992	4	43021169	43021172	4	-	4	CDS	ENSMUSG00000028454	Pigo
993	4	43415945	43415945	1	+	53	CDS	ENSMUSG00000035969	Rusc2
994	4	44142367	44142368	2	-	3	CDS	ENSMUSG00000035696	Rnf38
995	4	44142404	44142404	1	-	3	CDS	ENSMUSG00000035696	Rnf38
996	4	44763217	44763218	2	+	3	CDS	ENSMUSG00000035649	Zcchc7
997	4	48279415	48279419	5	-	6	CDS	ENSMUSG00000028343	Erp44
998	4	53563258	53563258	1	+	7	CDS	ENSMUSG00000028412	Slc44a1
999	4	56916725	56916727	3	-	3	CDS	ENSMUSG00000055296	Tmem245
1000	4	57854576	57854576	1	+	2	CDS	ENSMUSG00000089945	Pakap
1001	4	58824324	58824324	1	-	4	CDS	ENSMUSG00000050812	AI314180
1002	4	59207827	59207827	1	+	3	CDS	ENSMUSG00000028381	Ugcg
1003	4	59329519	59329520	2	-	3	CDS	ENSMUSG00000038578	Susd1
1004	4	59485370	59485371	2	-	5	CDS	ENSMUSG00000028382	Ptbp3
1005	4	62322190	62322190	1	-	4	CDS	ENSMUSG00000066151	Fkbp15
1006	4	63143813	63143813	1	-	2	CDS	ENSMUSG00000028356	Ambp
1007	4	98928885	98928886	2	+	4	CDS	ENSMUSG00000028560	Usp1
1008	4	99743872	99743872	1	+	3	CDS	ENSMUSG00000073792	Alg6
1009	4	99744537	99744537	1	+	3	CDS	ENSMUSG00000073792	Alg6
1010	4	101189176	101189176	1	-	3	CDS	ENSMUSG00000028530	Jak1
1011	4	106420538	106420539	2	+	4	CDS	ENSMUSG00000028514	Usp24
1012	4	107344622	107344623	2	+	3	CDS	ENSMUSG00000057375	Yipf1
1013	4	108098148	108098148	1	-	2	CDS	ENSMUSG00000028603	Scp2
1014	4	109013757	109013760	4	+	3	CDS	ENSMUSG00000053510	Nrd1
1015	4	109032473	109032473	1	+	3	CDS	ENSMUSG00000053510	Nrd1
1016	4	109107929	109107932	4	-	5	CDS	ENSMUSG00000028559	Osbpl9
1017	4	109361859	109361859	1	+	3	CDS	ENSMUSG00000028552	Eps15
1018	4	109378288	109378289	2	+	3	CDS	ENSMUSG00000028552	Eps15
1019	4	109661250	109661250	1	-	3	CDS	ENSMUSG00000028551	Cdkn2c
1020	4	115775109	115775109	1	+	3	CDS	ENSMUSG00000034210	Efcab14
1021	4	116313776	116313777	2	-	5	CDS	ENSMUSG00000003810	Mast2
1022	4	116553543	116553543	1	-	3	CDS	ENSMUSG00000055900	Tmem69
1023	4	116597343	116597345	3	+	6	CDS	ENSMUSG00000034035	Ccdc17
1024	4	116691812	116691818	7	+	29	CDS	ENSMUSG00000028691	Prdx1
1025	4	116691843	116691867	25	+	12	CDS	ENSMUSG00000028691	Prdx1
1026	4	120095882	120095882	1	+	2	CDS	ENSMUSG00000028634	Hivep3
1027	4	120096714	120096714	1	+	2	CDS	ENSMUSG00000028634	Hivep3
1028	4	123049548	123049548	1	+	3	CDS	ENSMUSG00000028653	Trit1
1029	4	123397832	123397833	2	-	7	CDS	ENSMUSG00000028649	Macf1
1030	4	124923738	124923738	1	-	3	CDS	ENSMUSG00000028873	Cdca8
1031	4	125007654	125007657	4	+	7	CDS	ENSMUSG00000028871	Rspo1
1032	4	126311574	126311574	1	+	3	CDS	ENSMUSG00000056174	Col8a2
1033	4	126324228	126324233	6	-	61	CDS	ENSMUSG00000028845	Tekt2
1034	4	126750331	126750331	1	-	3	CDS	ENSMUSG00000028833	Ncdn
1035	4	128745010	128745011	2	+	4	CDS	ENSMUSG00000028796	Phc2
1036	4	129189984	129189984	1	+	3	CDS	ENSMUSG00000028811	Yars
1037	4	129215240	129215240	1	+	3	CDS	ENSMUSG00000028811	Yars
1038	4	130327247	130327248	2	-	3	CDS	ENSMUSG00000028772	Zcchc17
1039	4	130926809	130926811	3	+	5	CDS	ENSMUSG00000028581	Laptm5
1040	4	130928739	130928740	2	+	6	CDS	ENSMUSG00000028581	Laptm5
1041	4	132204366	132204369	4	-	3	CDS	ENSMUSG00000040025	Ythdf2
1042	4	133416481	133416481	1	+	3	CDS	ENSMUSG00000028854	Slc9a1
1043	4	133613836	133613845	10	-	6	CDS	ENSMUSG00000037553	Zdhhc18
1044	4	133971062	133971062	1	-	3	CDS	ENSMUSG00000012117	Dhdds
1045	4	134093740	134093767	28	-	16	CDS	ENSMUSG00000000682	Cd52
1046	4	134093833	134093835	3	-	4	CDS	ENSMUSG00000000682	Cd52
1047	4	134093861	134093863	3	-	5	CDS	ENSMUSG00000000682	Cd52
1048	4	134411848	134411849	2	+	3	CDS	ENSMUSG00000037366	Pafah2
1049	4	134836367	134836368	2	-	3	CDS	ENSMUSG00000028826	Tmem57
1050	4	135324098	135324098	1	-	3	CDS	ENSMUSG00000028809	Srrm1
1051	4	135345285	135345285	1	-	3	CDS	ENSMUSG00000028809	Srrm1
1052	4	135872899	135872900	2	-	3	CDS	ENSMUSG00000028675	Pnrc2
1053	4	135977227	135977227	1	-	3	CDS	ENSMUSG00000028669	Pithd1
1054	4	136945971	136945973	3	-	243	CDS	ENSMUSG00000028661	Epha8
1055	4	136946091	136946093	3	-	4	CDS	ENSMUSG00000028661	Epha8
1056	4	137329036	137329037	2	-	6	CDS	ENSMUSG00000006699	Cdc42
1057	4	137329067	137329072	6	-	4	CDS	ENSMUSG00000006699	Cdc42
1058	4	137633503	137633549	47	+	25	CDS	ENSMUSG00000043411	Usp48
1059	4	138311694	138311695	2	+	3	CDS	ENSMUSG00000028757	Ddost
1060	4	138608805	138608805	1	-	2	CDS	ENSMUSG00000028753	Vwa5b1
1061	4	140721187	140721188	2	+	3	CDS	ENSMUSG00000040945	Rcc2
1062	4	141003195	141003195	1	+	3	CDS	ENSMUSG00000036622	Atp13a2
1063	4	143133552	143133587	36	-	18	CDS	ENSMUSG00000057637	Prdm2
1064	4	147941061	147941061	1	+	4	CDS	ENSMUSG00000044496	2510039O18Rik
1065	4	148017916	148017916	1	-	5	CDS	ENSMUSG00000029016	Clcn6
1066	4	150087967	150087967	1	+	2	CDS	ENSMUSG00000047875	Gpr157
1067	4	150246622	150246625	4	+	3	CDS	ENSMUSG00000063524	Eno1
1068	4	151952880	151952880	1	+	3	CDS	ENSMUSG00000039768	Dnajc11
1069	4	152283455	152283455	1	+	3	CDS	ENSMUSG00000042804	Gpr153
1070	4	154064712	154064712	1	-	2	CDS	ENSMUSG00000029026	Trp73
1071	5	4046461	4046462	2	+	6	CDS	ENSMUSG00000040407	Akap9
1072	5	8899699	8899699	1	+	2	CDS	ENSMUSG00000042476	Abcb4
1073	5	9117476	9117479	4	+	3	CDS	ENSMUSG00000079659	Tmem243
1074	5	17814736	17814737	2	-	3	CDS	ENSMUSG00000002944	Cd36
1075	5	20812982	20812988	7	-	4	CDS	ENSMUSG00000039987	Phtf2
1076	5	20905843	20905843	1	-	3	CDS	ENSMUSG00000039968	Rsbn1l
1077	5	20945334	20945337	4	-	4	CDS	ENSMUSG00000039968	Rsbn1l
1078	5	24571206	24571206	1	-	3	CDS	ENSMUSG00000028953	Abcf2
1079	5	25290529	25290529	1	-	3	CDS	ENSMUSG00000038056	Kmt2c
1080	5	25314160	25314160	1	-	3	CDS	ENSMUSG00000038056	Kmt2c
1081	5	28074519	28074522	4	+	11	CDS	ENSMUSG00000045294	Insig1
1082	5	28352694	28352696	3	+	4	CDS	ENSMUSG00000048271	Rbm33
1083	5	29323904	29323904	1	-	2	CDS	ENSMUSG00000010721	Lmbr1
1084	5	29757764	29757764	1	+	5	CDS	ENSMUSG00000029131	Dnajb6
1085	5	30063333	30063333	1	-	3	CDS	ENSMUSG00000025747	Tyms
1086	5	30266929	30266929	1	+	3	CDS	ENSMUSG00000075703	Selenoi
1087	5	30657646	30657647	2	+	3	CDS	ENSMUSG00000029175	Slc35f6
1088	5	30667652	30667653	2	+	4	CDS	ENSMUSG00000029177	Cenpa
1089	5	30955647	30955651	5	-	15	CDS	ENSMUSG00000045302	Preb
1090	5	30955982	30955982	1	-	3	CDS	ENSMUSG00000045302	Preb
1091	5	32828649	32828650	2	-	3	CDS	ENSMUSG00000054280	Prr14l
1092	5	33846165	33846166	2	+	3	CDS	ENSMUSG00000057406	Nsd2
1093	5	33887286	33887286	1	+	3	CDS	ENSMUSG00000057406	Nsd2
1094	5	35607118	35607118	1	+	3	CDS	ENSMUSG00000029098	Acox3
1095	5	43673793	43673795	3	+	2	CDS	ENSMUSG00000039765	Cc2d2a
1096	5	43758263	43758263	1	-	3	CDS	ENSMUSG00000039753	Fbxl5
1097	5	45525157	45525157	1	+	3	CDS	ENSMUSG00000015804	Med28
1098	5	45674791	45674791	1	+	3	CDS	ENSMUSG00000015880	Ncapg
1099	5	52150754	52150754	1	-	3	CDS	ENSMUSG00000029169	Dhx15
1100	5	52835895	52835895	1	+	3	CDS	ENSMUSG00000029176	Anapc4
1101	5	64284728	64284733	6	+	3	CDS	ENSMUSG00000029174	Tbc1d1
1102	5	65079977	65079977	1	-	3	CDS	ENSMUSG00000037913	Tmem156
1103	5	65808106	65808106	1	+	3	CDS	ENSMUSG00000037795	N4bp2
1104	5	67268631	67268631	1	+	3	CDS	ENSMUSG00000037720	Tmem33
1105	5	73069982	73069982	1	-	3	CDS	ENSMUSG00000070733	Fryl
1106	5	73310365	73310366	2	+	3	CDS	ENSMUSG00000029152	Ociad1
1107	5	76950994	76950994	1	-	3	CDS	ENSMUSG00000029246	Ppat
1108	5	76994890	76994890	1	+	4	CDS	ENSMUSG00000036323	Srp72
1109	5	86816518	86816518	1	+	2	CDS	ENSMUSG00000105704	Gm43055
1110	5	90218980	90218980	1	-	3	CDS	ENSMUSG00000035505	Cox18
1111	5	90244266	90244266	1	-	3	CDS	ENSMUSG00000055204	Ankrd17
1112	5	90365733	90365733	1	-	4	CDS	ENSMUSG00000055204	Ankrd17
1113	5	104478970	104478970	1	+	2	CDS	ENSMUSG00000034462	Pkd2
1114	5	108347950	108347950	1	+	3	CDS	ENSMUSG00000029263	Pigg
1115	5	108572069	108572070	2	-	4	CDS	ENSMUSG00000062234	Gak
1116	5	108592292	108592292	1	-	3	CDS	ENSMUSG00000062234	Gak
1117	5	108643184	108643187	4	+	4	CDS	ENSMUSG00000013495	Tmem175
1118	5	110330988	110330988	1	+	3	CDS	ENSMUSG00000007080	Pole
1119	5	110651735	110651735	1	-	3	CDS	ENSMUSG00000033294	Noc4l
1120	5	110705040	110705040	1	-	3	CDS	ENSMUSG00000029505	Ep400
1121	5	110791678	110791678	1	-	3	CDS	ENSMUSG00000029512	Ulk1
1122	5	110866416	110866416	1	+	3	CDS	ENSMUSG00000029521	Chek2
1123	5	111285211	111285211	1	+	2	CDS	ENSMUSG00000033209	Ttc28
1124	5	113847559	113847559	1	-	3	CDS	ENSMUSG00000004530	Coro1c
1125	5	115095119	115095119	1	+	3	CDS	ENSMUSG00000029550	Sppl3
1126	5	115130493	115130493	1	-	5	CDS	ENSMUSG00000046562	Unc119b
1127	5	115559888	115559888	1	+	4	CDS	ENSMUSG00000067274	Rplp0
1128	5	115560746	115560748	3	+	5	CDS	ENSMUSG00000067274	Rplp0
1129	5	121206674	121206676	3	+	5	CDS	ENSMUSG00000029614	Rpl6
1130	5	121452261	121452264	4	-	4	CDS	ENSMUSG00000029616	Erp29
1131	5	121818383	121818386	4	-	3	CDS	ENSMUSG00000042594	Sh2b3
1132	5	122819679	122819680	2	-	3	CDS	ENSMUSG00000029472	Anapc5
1133	5	123443951	123443951	1	+	4	CDS	ENSMUSG00000038342	Mlxip
1134	5	124112363	124112363	1	+	2	CDS	ENSMUSG00000023707	Ogfod2
1135	5	124143578	124143580	3	-	801	CDS	ENSMUSG00000029406	Pitpnm2
1136	5	124463806	124463806	1	-	4	CDS	ENSMUSG00000029401	Rilpl2
1137	5	124594825	124594827	3	+	4	CDS	ENSMUSG00000029387	Gtf2h3
1138	5	134559409	134559409	1	-	2	CDS	ENSMUSG00000085957	Syna
1139	5	135217520	135217520	1	+	3	CDS	ENSMUSG00000002748	Baz1b
1140	5	135217558	135217561	4	+	4	CDS	ENSMUSG00000002748	Baz1b
1141	5	135381890	135381891	2	-	5	CDS	ENSMUSG00000053293	Pom121
1142	5	135382479	135382479	1	-	4	CDS	ENSMUSG00000053293	Pom121
1143	5	137530257	137530258	2	-	3	CDS	ENSMUSG00000029711	Epo
1144	5	137607083	137607083	1	-	2	CDS	ENSMUSG00000029718	Pcolce
1145	5	138169560	138169560	1	-	3	CDS	ENSMUSG00000029730	Mcm7
1146	5	142904214	142904219	6	-	8	CDS	ENSMUSG00000029580	Actb
1147	5	142904348	142904364	17	-	104	CDS	ENSMUSG00000029580	Actb
1148	5	143326175	143326177	3	-	3	CDS	ENSMUSG00000001844	Zdhhc4
1149	5	143419444	143419444	1	+	3	CDS	ENSMUSG00000079111	Kdelr2
1150	5	145131512	145131512	1	-	3	CDS	ENSMUSG00000029623	Pdap1
1151	5	149050740	149050742	3	-	3	CDS	ENSMUSG00000066551	Hmgb1
1152	5	150568944	150568944	1	+	3	CDS	ENSMUSG00000041147	Brca2
1153	6	3375586	3375588	3	-	3	CDS	ENSMUSG00000047735	Samd9l
1154	6	4635807	4635808	2	+	3	CDS	ENSMUSG00000015189	Casd1
1155	6	11906032	11906035	4	-	3	CDS	ENSMUSG00000029632	Ndufa4
1156	6	13582804	13582808	5	-	4	CDS	ENSMUSG00000029569	Tmem168
1157	6	13602603	13602603	1	-	3	CDS	ENSMUSG00000029569	Tmem168
1158	6	13603109	13603112	4	-	3	CDS	ENSMUSG00000029569	Tmem168
1159	6	13603162	13603163	2	-	5	CDS	ENSMUSG00000029569	Tmem168
1160	6	13628961	13628963	3	-	3	CDS	ENSMUSG00000042742	Bmt2
1161	6	24108185	24108185	1	-	2	CDS	ENSMUSG00000029700	Slc13a1
1162	6	29768713	29768713	1	+	3	CDS	ENSMUSG00000029772	Ahcyl2
1163	6	35214371	35214371	1	+	3	CDS	ENSMUSG00000038759	Nup205
1164	6	38332905	38332905	1	-	4	CDS	ENSMUSG00000029826	Zc3hav1
1165	6	38353962	38353963	2	-	5	CDS	ENSMUSG00000029826	Zc3hav1
1166	6	39574647	39574647	1	+	3	CDS	ENSMUSG00000046947	Adck2
1167	6	48659310	48659310	1	+	4	CDS	ENSMUSG00000064262	Gimap8
1168	6	48743335	48743335	1	+	3	CDS	ENSMUSG00000098715	Gm28053
1169	6	48765111	48765112	2	-	5	CDS	ENSMUSG00000039264	Gimap3
1170	6	48834567	48834567	1	-	2	CDS	ENSMUSG00000029810	Tmem176b
1171	6	51464205	51464208	4	-	5	CDS	ENSMUSG00000004980	Hnrnpa2b1
1172	6	51466981	51467001	21	-	11	CDS	ENSMUSG00000004980	Hnrnpa2b1
1173	6	52158085	52158086	2	-	4	CDS	ENSMUSG00000029844	Hoxa1
1174	6	52721344	52721344	1	+	3	CDS	ENSMUSG00000004535	Tax1bp1
1175	6	67277860	67277861	2	+	4	CDS	ENSMUSG00000036371	Serbp1
1176	6	67609779	67609779	1	+	2	CDS	ENSMUSG00000096336	Igkv1-135
1177	6	68571164	68571165	2	+	2	CDS	ENSMUSG00000076526	Igkv12-98
1178	6	69823882	69823882	1	-	2	CDS	ENSMUSG00000094433	Igkv5-43
1179	6	70074562	70074562	1	-	2	CDS	ENSMUSG00000076576	Igkv6-32
1180	6	70723552	70723558	7	+	4	CDS	ENSMUSG00000105646	Gm30211
1181	6	70726485	70726489	5	+	6	CDS	ENSMUSG00000105646	Gm30211
1182	6	70726527	70726534	8	+	12	CDS	ENSMUSG00000105646	Gm30211
1183	6	70726671	70726677	7	+	4	CDS	ENSMUSG00000105646	Gm30211
1184	6	70726714	70726729	16	+	24	CDS	ENSMUSG00000105646	Gm30211
1185	6	70882265	70882267	3	+	3	CDS	ENSMUSG00000031668	Eif2ak3
1186	6	71874641	71874641	1	+	3	CDS	ENSMUSG00000052337	Immt
1187	6	72433290	72433290	1	-	4	CDS	ENSMUSG00000053907	Mat2a
1188	6	82760123	82760123	1	-	3	CDS	ENSMUSG00000000628	Hk2
1189	6	83103123	83103123	1	+	3	CDS	ENSMUSG00000079511	Gm42688
1190	6	83190771	83190772	2	+	4	CDS	ENSMUSG00000031865	Dctn1
1191	6	83334192	83334193	2	+	4	CDS	ENSMUSG00000043131	Mob1a
1192	6	83953363	83953363	1	+	3	CDS	ENSMUSG00000030016	Zfp638
1193	6	85629396	85629396	1	+	3	CDS	ENSMUSG00000063810	Alms1
1194	6	88512224	88512227	4	-	9	CDS	ENSMUSG00000030082	Sec61a1
1195	6	90690478	90690479	2	-	4	CDS	ENSMUSG00000034312	Iqsec1
1196	6	91016024	91016025	2	-	8	CDS	ENSMUSG00000030091	Nup210
1197	6	95121865	95121865	1	+	3	CDS	ENSMUSG00000030031	Kbtbd8
1198	6	97229724	97229727	4	+	3	CDS	ENSMUSG00000035199	Arl6ip5
1199	6	98941128	98941130	3	-	3	CDS	ENSMUSG00000030067	Foxp1
1200	6	99693096	99693096	1	+	6	CDS	ENSMUSG00000072875	Gpr27
1201	6	106778880	106778880	1	+	3	CDS	ENSMUSG00000013736	Trnt1
1202	6	108515908	108515910	3	+	4	CDS	ENSMUSG00000030102	Itpr1
1203	6	108855507	108855507	1	+	3	CDS	ENSMUSG00000030104	Edem1
1204	6	113240389	113240390	2	+	3	CDS	ENSMUSG00000030269	Mtmr14
1205	6	113270658	113270659	2	+	3	CDS	ENSMUSG00000030269	Mtmr14
1206	6	113469102	113469106	5	+	35	CDS	ENSMUSG00000043088	Il17re
1207	6	115993716	115993716	1	-	4	CDS	ENSMUSG00000030123	Plxnd1
1208	6	119355881	119355882	2	-	3	CDS	ENSMUSG00000030168	Adipor2
1209	6	119948740	119948741	2	-	3	CDS	ENSMUSG00000045962	Wnk1
1210	6	119949262	119949265	4	-	3	CDS	ENSMUSG00000045962	Wnk1
1211	6	119949344	119949345	2	-	5	CDS	ENSMUSG00000045962	Wnk1
1212	6	119962423	119962423	1	-	3	CDS	ENSMUSG00000045962	Wnk1
1213	6	119962547	119962547	1	-	3	CDS	ENSMUSG00000045962	Wnk1
1214	6	119965807	119965807	1	-	7	CDS	ENSMUSG00000045962	Wnk1
1215	6	120203894	120203896	3	-	14	CDS	ENSMUSG00000041372	B4galnt3
1216	6	120294538	120294539	2	+	3	CDS	ENSMUSG00000097481	D330020A13Rik
1217	6	124705208	124705210	3	-	4	CDS	ENSMUSG00000004268	Emg1
1218	6	124727364	124727365	2	-	5	CDS	ENSMUSG00000004266	Ptpn6
1219	6	125025931	125025931	1	+	3	CDS	ENSMUSG00000038346	Zfp384
1220	6	125109056	125109056	1	+	3	CDS	ENSMUSG00000063870	Chd4
1221	6	125220057	125220059	3	+	3	CDS	ENSMUSG00000030337	Vamp1
1222	6	129353420	129353421	2	+	2	CDS	ENSMUSG00000053063	Clec12a
1223	6	134921093	134921093	1	+	3	CDS	ENSMUSG00000003031	Cdkn1b
1224	6	136804378	136804413	36	-	16	CDS	ENSMUSG00000096010	Hist4h4
1225	6	143203062	143203092	31	+	15	CDS	ENSMUSG00000030275	Etnk1
1226	6	145138074	145138074	1	+	3	CDS	ENSMUSG00000030263	Lrmp
1227	6	149044917	149044917	1	-	3	CDS	ENSMUSG00000030313	Dennd5b
1228	7	3704374	3704375	2	+	4	CDS	ENSMUSG00000006333	Rps9
1229	7	3704654	3704655	2	+	5	CDS	ENSMUSG00000006333	Rps9
1230	7	3705825	3705825	1	+	4	CDS	ENSMUSG00000006333	Rps9
1231	7	3706681	3706682	2	+	4	CDS	ENSMUSG00000006333	Rps9
1232	7	3714625	3714625	1	-	4	CDS	ENSMUSG00000058818	Pirb
1233	7	4628723	4628727	5	-	3	CDS	ENSMUSG00000045282	Tmem86b
1234	7	5029380	5029381	2	+	4	CDS	ENSMUSG00000074405	Zfp865
1235	7	12925465	12925467	3	+	4	CDS	ENSMUSG00000012848	Rps5
1236	7	12925496	12925499	4	+	10	CDS	ENSMUSG00000012848	Rps5
1237	7	12926434	12926434	1	+	3	CDS	ENSMUSG00000012848	Rps5
1238	7	13303209	13303212	4	+	3	CDS	ENSMUSG00000056394	Lig1
1239	7	16113127	16113127	1	+	4	CDS	ENSMUSG00000006024	Napa
1240	7	16782440	16782440	1	+	3	CDS	ENSMUSG00000001918	Slc1a5
1241	7	16789885	16789888	4	+	5	CDS	ENSMUSG00000001918	Slc1a5
1242	7	16831367	16831367	1	+	3	CDS	ENSMUSG00000030374	Strn4
1243	7	16831416	16831421	6	+	5	CDS	ENSMUSG00000030374	Strn4
1244	7	16858399	16858401	3	+	3	CDS	ENSMUSG00000041187	Prkd2
1245	7	16886264	16886270	7	+	40	CDS	ENSMUSG00000078794	Dact3
1246	7	23865685	23865687	3	-	3	CDS	ENSMUSG00000057513	Vmn1r177
1247	7	24595042	24595042	1	+	2	CDS	ENSMUSG00000064254	Ethe1
1248	7	24885038	24885039	2	+	4	CDS	ENSMUSG00000040952	Rps19
1249	7	25093144	25093146	3	-	12	CDS	ENSMUSG00000008496	Pou2f2
1250	7	25097472	25097472	1	-	3	CDS	ENSMUSG00000008496	Pou2f2
1251	7	25100169	25100170	2	-	3	CDS	ENSMUSG00000008496	Pou2f2
1252	7	25115711	25115712	2	-	3	CDS	ENSMUSG00000008496	Pou2f2
1253	7	25288255	25288255	1	+	3	CDS	ENSMUSG00000005442	Cic
1254	7	25395591	25395593	3	-	5	CDS	ENSMUSG00000003123	Lipe
1255	7	27197097	27197097	1	+	3	CDS	ENSMUSG00000078786	BC024978
1256	7	28377847	28377862	16	-	15	CDS	ENSMUSG00000044786	Zfp36
1257	7	28377933	28377934	2	-	5	CDS	ENSMUSG00000044786	Zfp36
1258	7	28811130	28811130	1	+	5	CDS	ENSMUSG00000015165	Hnrnpl
1259	7	28814210	28814229	20	+	6	CDS	ENSMUSG00000015165	Hnrnpl
1260	7	28815298	28815298	1	+	3	CDS	ENSMUSG00000015165	Hnrnpl
1261	7	28820698	28820706	9	+	4	CDS	ENSMUSG00000015165	Hnrnpl
1262	7	28980464	28980465	2	-	3	CDS	ENSMUSG00000053565	Eif3k
1263	7	29387156	29387156	1	-	2	CDS	ENSMUSG00000030583	Sipa1l3
1264	7	30590453	30590457	5	-	3	CDS	ENSMUSG00000006310	Zbtb32
1265	7	30590694	30590697	4	-	7	CDS	ENSMUSG00000006310	Zbtb32
1266	7	30872774	30872774	1	-	4	CDS	ENSMUSG00000030577	Cd22
1267	7	30876062	30876065	4	-	4	CDS	ENSMUSG00000030577	Cd22
1268	7	34220673	34220674	2	-	4	CDS	ENSMUSG00000036427	Gpi1
1269	7	34347961	34347961	1	-	3	CDS	ENSMUSG00000066568	Lsm14a
1270	7	43411067	43411067	1	+	5	CDS	ENSMUSG00000030468	Siglecg
1271	7	44581280	44581281	2	+	3	CDS	ENSMUSG00000002204	Napsa
1272	7	45049070	45049071	2	-	4	CDS	ENSMUSG00000046574	Prr12
1273	7	45235500	45235503	4	-	7	CDS	ENSMUSG00000030798	Cd37
1274	7	45238466	45238469	4	-	16	CDS	ENSMUSG00000030798	Cd37
1275	7	45238504	45238505	2	-	6	CDS	ENSMUSG00000030798	Cd37
1276	7	45238551	45238554	4	-	6	CDS	ENSMUSG00000030798	Cd37
1277	7	45238664	45238668	5	-	4	CDS	ENSMUSG00000030798	Cd37
1278	7	45383776	45383778	3	-	4	CDS	ENSMUSG00000063511	Snrnp70
1279	7	45458119	45458137	19	-	10	CDS	ENSMUSG00000050708	Ftl1
1280	7	45874064	45874064	1	+	6	CDS	ENSMUSG00000002778	Kdelr1
1281	7	45920307	45920309	3	-	4	CDS	ENSMUSG00000040212	Emp3
1282	7	46850212	46850214	3	+	3	CDS	ENSMUSG00000063229	Ldha
1283	7	67952914	67952916	3	+	4	CDS	ENSMUSG00000005533	Igf1r
1284	7	80313219	80313220	2	+	3	CDS	ENSMUSG00000038943	Prc1
1285	7	82686713	82686713	1	+	3	CDS	ENSMUSG00000038563	Efl1
1286	7	83645834	83645834	1	-	2	CDS	ENSMUSG00000001741	Il16
1287	7	83650941	83650941	1	-	3	CDS	ENSMUSG00000001741	Il16
1288	7	83652402	83652402	1	-	2	CDS	ENSMUSG00000001741	Il16
1289	7	83652485	83652487	3	-	2	CDS	ENSMUSG00000001741	Il16
1290	7	92657457	92657457	1	-	3	CDS	ENSMUSG00000041328	Pcf11
1291	7	97391715	97391716	2	+	4	CDS	ENSMUSG00000035704	Alg8
1292	7	97517731	97517731	1	+	3	CDS	ENSMUSG00000025133	Ints4
1293	7	99840794	99840794	1	-	3	CDS	ENSMUSG00000035227	Spcs2
1294	7	100335098	100335099	2	-	4	CDS	ENSMUSG00000030718	Ppme1
1295	7	100498425	100498429	5	+	4	CDS	ENSMUSG00000033685	Ucp2
1296	7	100498753	100498766	14	+	11	CDS	ENSMUSG00000033685	Ucp2
1297	7	100498906	100498911	6	+	8	CDS	ENSMUSG00000033685	Ucp2
1298	7	100499282	100499284	3	+	5	CDS	ENSMUSG00000033685	Ucp2
1299	7	100499312	100499313	2	+	7	CDS	ENSMUSG00000033685	Ucp2
1300	7	101271571	101271574	4	+	3	CDS	ENSMUSG00000030691	Fchsd2
1301	7	102127803	102127803	1	-	4	CDS	ENSMUSG00000063550	Nup98
1302	7	102237168	102237170	3	+	3	CDS	ENSMUSG00000111339	AC139579.1
1303	7	102239672	102239674	3	-	3	CDS	ENSMUSG00000073982	Rhog
1304	7	104341107	104341107	1	-	4	CDS	ENSMUSG00000057143	Trim12c
1305	7	104411315	104411315	1	-	3	CDS	ENSMUSG00000030921	Trim30a
1306	7	105557812	105557812	1	+	3	CDS	ENSMUSG00000037049	Smpd1
1307	7	108934697	108934700	4	+	10	CDS	ENSMUSG00000031029	Eif3f
1308	7	111046872	111046872	1	+	3	CDS	ENSMUSG00000005609	Ctr9
1309	7	113347132	113347133	2	-	3	CDS	ENSMUSG00000038187	Btbd10
1310	7	113540613	113540613	1	+	4	CDS	ENSMUSG00000030759	Far1
1311	7	118109103	118109104	2	-	3	CDS	ENSMUSG00000008683	Rps15a
1312	7	118136697	118136697	1	-	3	CDS	ENSMUSG00000030655	Smg1
1313	7	118189281	118189282	2	-	4	CDS	ENSMUSG00000030655	Smg1
1314	7	118190600	118190600	1	-	3	CDS	ENSMUSG00000030655	Smg1
1315	7	118200688	118200689	2	-	3	CDS	ENSMUSG00000030655	Smg1
1316	7	119828096	119828096	1	+	3	CDS	ENSMUSG00000030924	Rexo5
1317	7	120637925	120637925	1	+	3	CDS	ENSMUSG00000030884	Uqcrc2
1318	7	120725357	120725359	3	+	3	CDS	ENSMUSG00000046096	Mosmo
1319	7	122111673	122111674	2	-	3	CDS	ENSMUSG00000044702	Palb2
1320	7	122424998	122424998	1	+	3	CDS	ENSMUSG00000052889	Prkcb
1321	7	122997090	122997091	2	+	3	CDS	ENSMUSG00000030779	Rbbp6
1322	7	125647529	125647532	4	-	5	CDS	ENSMUSG00000032777	Gtf3c1
1323	7	126413491	126413492	2	-	6	CDS	ENSMUSG00000030724	Cd19
1324	7	126414791	126414807	17	-	24	CDS	ENSMUSG00000030724	Cd19
1325	7	126492546	126492547	2	-	8	CDS	ENSMUSG00000032637	Atxn2l
1326	7	126497277	126497277	1	-	4	CDS	ENSMUSG00000032637	Atxn2l
1327	7	126700825	126700840	16	-	12	CDS	ENSMUSG00000030707	Coro1a
1328	7	126701006	126701008	3	-	3	CDS	ENSMUSG00000030707	Coro1a
1329	7	126763221	126763221	1	+	4	CDS	ENSMUSG00000063065	Mapk3
1330	7	126795751	126795754	4	-	4	CDS	ENSMUSG00000030695	Aldoa
1331	7	126868839	126868847	9	-	6	CDS	ENSMUSG00000059981	Taok2
1332	7	126870764	126870764	1	-	3	CDS	ENSMUSG00000059981	Taok2
1333	7	126976782	126976783	2	+	4	CDS	ENSMUSG00000030682	Cdipt
1334	7	127489190	127489190	1	+	3	CDS	ENSMUSG00000042423	Fbrs
1335	7	127538090	127538090	1	+	3	CDS	ENSMUSG00000107023	Gm42715
1336	7	127539109	127539111	3	+	3	CDS	ENSMUSG00000107023	Gm42715
1337	7	127539791	127539794	4	+	4	CDS	ENSMUSG00000053877	Srcap
1338	7	127541318	127541320	3	+	3	CDS	ENSMUSG00000107023	Gm42715
1339	7	127541351	127541351	1	+	3	CDS	ENSMUSG00000107023	Gm42715
1340	7	127541377	127541378	2	+	4	CDS	ENSMUSG00000053877	Srcap
1341	7	127541414	127541423	10	+	6	CDS	ENSMUSG00000053877	Srcap
1342	7	127541478	127541478	1	+	3	CDS	ENSMUSG00000107023	Gm42715
1343	7	127541588	127541590	3	+	5	CDS	ENSMUSG00000107023	Gm42715
1344	7	127541822	127541823	2	+	5	CDS	ENSMUSG00000107023	Gm42715
1345	7	127541852	127541853	2	+	3	CDS	ENSMUSG00000107023	Gm42715
1346	7	127541876	127541879	4	+	5	CDS	ENSMUSG00000107023	Gm42715
1347	7	127542104	127542108	5	+	10	CDS	ENSMUSG00000053877	Srcap
1348	7	127542146	127542152	7	+	4	CDS	ENSMUSG00000053877	Srcap
1349	7	127542355	127542355	1	+	3	CDS	ENSMUSG00000107023	Gm42715
1350	7	127542519	127542520	2	+	3	CDS	ENSMUSG00000107023	Gm42715
1351	7	127549323	127549324	2	+	5	CDS	ENSMUSG00000107023	Gm42715
1352	7	127558315	127558335	21	+	10	CDS	ENSMUSG00000053877	Srcap
1353	7	127558362	127558363	2	+	3	CDS	ENSMUSG00000107023	Gm42715
1354	7	127558411	127558430	20	+	13	CDS	ENSMUSG00000053877	Srcap
1355	7	127558525	127558531	7	+	7	CDS	ENSMUSG00000053877	Srcap
1356	7	127558603	127558604	2	+	3	CDS	ENSMUSG00000107023	Gm42715
1357	7	127558667	127558684	18	+	9	CDS	ENSMUSG00000107023	Gm42715
1358	7	127558847	127558849	3	+	3	CDS	ENSMUSG00000107023	Gm42715
1359	7	127748288	127748288	1	+	5	CDS	ENSMUSG00000030811	Fbxl19
1360	7	127778209	127778210	2	+	3	CDS	ENSMUSG00000042308	Setd1a
1361	7	128698458	128698459	2	-	3	CDS	ENSMUSG00000048170	Mcmbp
1362	7	130542694	130542694	1	-	2	CDS	ENSMUSG00000030849	Fgfr2
1363	7	132558184	132558184	1	-	2	CDS	ENSMUSG00000030849	Fgfr2
1364	7	135704177	135704180	4	-	3	CDS	ENSMUSG00000031004	Mki67
1365	7	135708144	135708144	1	-	3	CDS	ENSMUSG00000031004	Mki67
1366	7	138876456	138876456	1	+	3	CDS	ENSMUSG00000041769	Ppp2r2d
1367	7	140857526	140857526	1	+	3	CDS	ENSMUSG00000025485	Ric8a
1368	7	140955026	140955026	1	-	2	CDS	ENSMUSG00000110104	Gm45717
1369	7	141240934	141240934	1	+	3	CDS	ENSMUSG00000038611	Phrf1
1370	7	141411035	141411035	1	-	3	CDS	ENSMUSG00000051007	Gatd1
1371	7	141527699	141527699	1	-	3	CDS	ENSMUSG00000025512	Chid1
1372	7	143527228	143527228	1	-	3	CDS	ENSMUSG00000059119	Nap1l4
1373	8	3634474	3634477	4	+	12	CDS	ENSMUSG00000004626	Stxbp2
1374	8	3687971	3687972	2	-	4	CDS	ENSMUSG00000005540	Fcer2a
1375	8	11529595	11529595	1	-	3	CDS	ENSMUSG00000056228	Cars2
1376	8	13174455	13174455	1	+	3	CDS	ENSMUSG00000031447	Lamp1
1377	8	13584941	13584942	2	-	3	CDS	ENSMUSG00000031453	Rasa3
1378	8	22065277	22065277	1	+	3	CDS	ENSMUSG00000063362	Alg11
1379	8	25182014	25182017	4	-	3	CDS	ENSMUSG00000065954	Tacc1
1380	8	25709096	25709096	1	+	3	CDS	ENSMUSG00000054823	Nsd3
1381	8	33615685	33615685	1	+	3	CDS	ENSMUSG00000009630	Ppp2cb
1382	8	34168469	34168469	1	+	2	CDS	ENSMUSG00000031532	Saraf
1383	8	41293642	41293643	2	+	3	CDS	ENSMUSG00000031592	Pcm1
1384	8	57514092	57514093	2	+	4	CDS	ENSMUSG00000054717	Hmgb2
1385	8	67817973	67817973	1	-	2	CDS	ENSMUSG00000030465	Psd3
1386	8	68820772	68820772	1	+	3	CDS	ENSMUSG00000031864	Ints10
1387	8	70178940	70178942	3	+	3	CDS	ENSMUSG00000002342	Tmem161a
1388	8	70513987	70513987	1	-	3	CDS	ENSMUSG00000055553	Kxd1
1389	8	71680971	71680973	3	+	3	CDS	ENSMUSG00000031805	Jak3
1390	8	72320012	72320014	3	+	6	CDS	ENSMUSG00000055148	Klf2
1391	8	72320845	72320846	2	+	3	CDS	ENSMUSG00000055148	Klf2
1392	8	72367979	72367980	2	-	4	CDS	ENSMUSG00000006276	Eps15l1
1393	8	79673183	79673183	1	+	3	CDS	ENSMUSG00000036990	Otud4
1394	8	80738950	80738953	4	-	8	CDS	ENSMUSG00000031715	Smarca5
1395	8	83572553	83572554	2	-	4	CDS	ENSMUSG00000031708	Tecr
1396	8	83719536	83719536	1	+	7	CDS	ENSMUSG00000005481	Ddx39
1397	8	84695483	84695483	1	+	3	CDS	ENSMUSG00000001909	Trmt1
1398	8	84838860	84838860	1	-	3	CDS	ENSMUSG00000003813	Rad23a
1399	8	84970453	84970456	4	+	10	CDS	ENSMUSG00000005161	Prdx2
1400	8	88325394	88325394	1	+	3	CDS	ENSMUSG00000031659	Adcy7
1401	8	93985429	93985429	1	-	3	CDS	ENSMUSG00000031751	Amfr
1402	8	93999112	93999112	1	-	4	CDS	ENSMUSG00000031751	Amfr
1403	8	94392462	94392466	5	+	7	CDS	ENSMUSG00000031770	Herpud1
1404	8	95728724	95728724	1	-	3	CDS	ENSMUSG00000036550	Cnot1
1405	8	95730610	95730614	5	-	3	CDS	ENSMUSG00000036550	Cnot1
1406	8	95756217	95756218	2	-	3	CDS	ENSMUSG00000036550	Cnot1
1407	8	95763108	95763108	1	-	3	CDS	ENSMUSG00000036550	Cnot1
1408	8	105178661	105178661	1	+	3	CDS	ENSMUSG00000031885	Cbfb
1409	8	105304662	105304663	2	+	3	CDS	ENSMUSG00000014859	E2f4
1410	8	105328777	105328777	1	+	2	CDS	ENSMUSG00000014856	Tmem208
1411	8	105472622	105472622	1	-	3	CDS	ENSMUSG00000039199	Zdhhc1
1412	8	105566909	105566909	1	-	21	CDS	ENSMUSG00000005705	Agrp
1413	8	105698750	105698753	4	-	3	CDS	ENSMUSG00000038000	Acd
1414	8	106078632	106078635	4	+	3	CDS	ENSMUSG00000031902	Nfatc3
1415	8	106079697	106079698	2	+	3	CDS	ENSMUSG00000031902	Nfatc3
1416	8	106104092	106104092	1	+	4	CDS	ENSMUSG00000031902	Nfatc3
1417	8	106108619	106108620	2	+	3	CDS	ENSMUSG00000031902	Nfatc3
1418	8	106108653	106108654	2	+	4	CDS	ENSMUSG00000031902	Nfatc3
1419	8	106108705	106108709	5	+	4	CDS	ENSMUSG00000031902	Nfatc3
1420	8	106179325	106179327	3	+	3	CDS	ENSMUSG00000031904	Slc7a6
1421	8	106886067	106886068	2	-	3	CDS	ENSMUSG00000046691	Chtf8
1422	8	107052623	107052623	1	-	3	CDS	ENSMUSG00000031916	Cog8
1423	8	110101489	110101492	4	+	3	CDS	ENSMUSG00000095941	Gm21964
1424	8	111273089	111273090	2	-	4	CDS	ENSMUSG00000033596	Rfwd3
1425	8	112005783	112005783	1	-	3	CDS	ENSMUSG00000031948	Kars
1426	8	114448220	114448220	1	+	2	CDS	ENSMUSG00000004637	Wwox
1427	8	120672806	120672807	2	+	3	CDS	ENSMUSG00000092329	Gm20388
1428	8	120673305	120673305	1	+	3	CDS	ENSMUSG00000092329	Gm20388
1429	8	120743807	120743813	7	+	4	CDS	ENSMUSG00000092329	Gm20388
1430	8	122403293	122403293	1	+	2	CDS	ENSMUSG00000092329	Gm20388
1431	8	122497944	122497944	1	-	3	CDS	ENSMUSG00000014444	Piezo1
1432	8	122572579	122572579	1	+	2	CDS	ENSMUSG00000092329	Gm20388
1433	8	122572639	122572639	1	+	2	CDS	ENSMUSG00000092329	Gm20388
1434	8	122891012	122891013	2	-	8	CDS	ENSMUSG00000035569	Ankrd11
1435	8	122898506	122898509	4	-	3	CDS	ENSMUSG00000035569	Ankrd11
1436	8	123105198	123105202	5	+	3	CDS	ENSMUSG00000092329	Gm20388
1437	8	123224952	123224952	1	+	2	CDS	ENSMUSG00000092329	Gm20388
1438	8	123389702	123389702	1	+	3	CDS	ENSMUSG00000092329	Gm20388
1439	8	123827427	123827428	2	+	2	CDS	ENSMUSG00000019478	Rab4a
1440	8	123929355	123929355	1	-	3	CDS	ENSMUSG00000039509	Nup133
1441	8	124028160	124028160	1	+	2	CDS	ENSMUSG00000092329	Gm20388
1442	8	124903045	124903046	2	+	7	CDS	ENSMUSG00000031986	Sprtn
1443	9	7206891	7206895	5	+	4	CDS	ENSMUSG00000032002	Dcun1d5
1444	9	20918529	20918531	3	-	3	CDS	ENSMUSG00000004099	Dnmt1
1445	9	21667271	21667273	3	+	3	CDS	ENSMUSG00000032187	Smarca4
1446	9	21956829	21956829	1	+	2	CDS	ENSMUSG00000051238	Swsap1
1447	9	31053971	31053971	1	+	3	CDS	ENSMUSG00000047412	Zbtb44
1448	9	35188916	35188916	1	-	3	CDS	ENSMUSG00000032041	Tirap
1449	9	35211340	35211340	1	+	4	CDS	ENSMUSG00000032042	Srpr
1450	9	35213251	35213251	1	+	2	CDS	ENSMUSG00000032042	Srpr
1451	9	35213965	35213966	2	+	3	CDS	ENSMUSG00000032042	Srpr
1452	9	35215987	35215987	1	+	2	CDS	ENSMUSG00000032042	Srpr
1453	9	36735525	36735525	1	-	3	CDS	ENSMUSG00000032116	Stt3a
1454	9	36743574	36743574	1	-	3	CDS	ENSMUSG00000032116	Stt3a
1455	9	36744095	36744095	1	-	3	CDS	ENSMUSG00000032116	Stt3a
1456	9	36746625	36746625	1	-	3	CDS	ENSMUSG00000032116	Stt3a
1457	9	36752341	36752341	1	-	4	CDS	ENSMUSG00000032116	Stt3a
1458	9	36758772	36758773	2	-	5	CDS	ENSMUSG00000032116	Stt3a
1459	9	36763381	36763381	1	-	3	CDS	ENSMUSG00000032116	Stt3a
1460	9	40802004	40802006	3	+	4	CDS	ENSMUSG00000015656	Hspa8
1461	9	42255736	42255740	5	-	3	CDS	ENSMUSG00000032018	Sc5d
1462	9	44112724	44112725	2	-	4	CDS	ENSMUSG00000111409	Gm49380
1463	9	44385271	44385274	4	+	3	CDS	ENSMUSG00000032115	Hyou1
1464	9	44513544	44513544	1	-	3	CDS	ENSMUSG00000047880	Cxcr5
1465	9	44514034	44514037	4	-	3	CDS	ENSMUSG00000047880	Cxcr5
1466	9	44514059	44514059	1	-	3	CDS	ENSMUSG00000047880	Cxcr5
1467	9	44631401	44631402	2	+	15	CDS	ENSMUSG00000032097	Ddx6
1468	9	44635736	44635737	2	+	3	CDS	ENSMUSG00000032097	Ddx6
1469	9	44783737	44783738	2	+	3	CDS	ENSMUSG00000002031	Ift46
1470	9	44825484	44825484	1	-	3	CDS	ENSMUSG00000002028	Kmt2a
1471	9	44842311	44842311	1	-	3	CDS	ENSMUSG00000002028	Kmt2a
1472	9	44848169	44848172	4	-	7	CDS	ENSMUSG00000002028	Kmt2a
1473	9	45919811	45919814	4	+	3	CDS	ENSMUSG00000035382	Pcsk7
1474	9	45943677	45943677	1	-	3	CDS	ENSMUSG00000034908	Sidt2
1475	9	48474512	48474512	1	-	3	CDS	ENSMUSG00000032026	Rexo2
1476	9	50669492	50669492	1	-	3	CDS	ENSMUSG00000032064	Dixdc1
1477	9	50783276	50783276	1	+	3	CDS	ENSMUSG00000032059	Alg9
1478	9	50787671	50787671	1	+	3	CDS	ENSMUSG00000032059	Alg9
1479	9	51239117	51239120	4	+	8	CDS	ENSMUSG00000032053	Pou2af1
1480	9	53511724	53511725	2	-	3	CDS	ENSMUSG00000034218	Atm
1481	9	57258001	57258002	2	-	3	CDS	ENSMUSG00000032300	1700017B05Rik
1482	9	57587159	57587161	3	+	3	CDS	ENSMUSG00000040188	Scamp2
1483	9	57956510	57956514	5	+	5	CDS	ENSMUSG00000038264	Sema7a
1484	9	58220101	58220102	2	-	3	CDS	ENSMUSG00000036986	Pml
1485	9	59675568	59675568	1	+	4	CDS	ENSMUSG00000032294	Pkm
1486	9	61913314	61913333	20	-	19	CDS	ENSMUSG00000007892	Rplp1
1487	9	61913427	61913430	4	-	6	CDS	ENSMUSG00000007892	Rplp1
1488	9	61963817	61963817	1	-	3	CDS	ENSMUSG00000032278	Paqr5
1489	9	62374707	62374709	3	+	3	CDS	ENSMUSG00000032249	Anp32a
1490	9	62951959	62951959	1	-	3	CDS	ENSMUSG00000032405	Pias1
1491	9	64174899	64174903	5	+	4	CDS	ENSMUSG00000032399	Rpl4
1492	9	64177768	64177768	1	+	4	CDS	ENSMUSG00000032399	Rpl4
1493	9	64851336	64851336	1	+	3	CDS	ENSMUSG00000053641	Dennd4a
1494	9	64852578	64852582	5	+	12	CDS	ENSMUSG00000053641	Dennd4a
1495	9	64852651	64852652	2	+	3	CDS	ENSMUSG00000053641	Dennd4a
1496	9	64896706	64896707	2	+	3	CDS	ENSMUSG00000053641	Dennd4a
1497	9	65468886	65468889	4	+	4	CDS	ENSMUSG00000032388	Spg21
1498	9	66402610	66402610	1	+	3	CDS	ENSMUSG00000038664	Herc1
1499	9	66919524	66919524	1	-	3	CDS	ENSMUSG00000036943	Rab8b
1500	9	70703430	70703430	1	+	3	CDS	ENSMUSG00000054693	Adam10
1501	9	75130117	75130117	1	+	3	CDS	ENSMUSG00000034593	Myo5a
1502	9	75388846	75388848	3	-	14	CDS	ENSMUSG00000042688	Mapk6
1503	9	78478971	78478978	8	-	14	CDS	ENSMUSG00000037742	Eef1a1
1504	9	78479069	78479073	5	-	4	CDS	ENSMUSG00000037742	Eef1a1
1505	9	78479157	78479158	2	-	3	CDS	ENSMUSG00000037742	Eef1a1
1506	9	78479506	78479506	1	-	3	CDS	ENSMUSG00000037742	Eef1a1
1507	9	78479683	78479694	12	-	10	CDS	ENSMUSG00000037742	Eef1a1
1508	9	78480399	78480400	2	-	3	CDS	ENSMUSG00000037742	Eef1a1
1509	9	78480623	78480628	6	-	4	CDS	ENSMUSG00000037742	Eef1a1
1510	9	88456443	88456443	1	-	3	CDS	ENSMUSG00000092541	Gm20537
1511	9	88957358	88957358	1	+	2	CDS	ENSMUSG00000102037	Bcl2a1a
1512	9	95865676	95865679	4	+	7	CDS	ENSMUSG00000032409	Atr
1513	9	96340223	96340223	1	-	6	CDS	ENSMUSG00000032412	Atp1b3
1514	9	96545655	96545655	1	-	3	CDS	ENSMUSG00000032413	Rasa2
1515	9	96688823	96688823	1	-	9	CDS	ENSMUSG00000040433	Zbtb38
1516	9	103323434	103323436	3	+	3	CDS	ENSMUSG00000032555	Topbp1
1517	9	106184272	106184272	1	+	3	CDS	ENSMUSG00000020257	Wdr82
1518	9	106224704	106224705	2	+	4	CDS	ENSMUSG00000045322	Tlr9
1519	9	106226056	106226056	1	+	4	CDS	ENSMUSG00000045322	Tlr9
1520	9	106435489	106435491	3	-	3	CDS	ENSMUSG00000023262	Acy1
1521	9	107257436	107257436	1	-	4	CDS	ENSMUSG00000032577	Mapkapk3
1522	9	107525656	107525656	1	+	15	CDS	ENSMUSG00000010066	Cacna2d2
1523	9	107634422	107634422	1	-	4	CDS	ENSMUSG00000032562	Gnai2
1524	9	107984886	107984886	1	-	2	CDS	ENSMUSG00000042106	Fam212a
1525	9	108051898	108051898	1	-	5	CDS	ENSMUSG00000041528	Rnf123
1526	9	108106262	108106262	1	-	3	CDS	ENSMUSG00000032589	Bsn
1527	9	108566374	108566374	1	-	2	CDS	ENSMUSG00000070283	Ndufaf3
1528	9	108814540	108814540	1	+	3	CDS	ENSMUSG00000032598	Nckipsd
1529	9	108845811	108845811	1	+	3	CDS	ENSMUSG00000023473	Celsr3
1530	9	109892098	109892100	3	+	36	CDS	ENSMUSG00000032477	Cdc25a
1531	9	110387612	110387613	2	-	3	CDS	ENSMUSG00000036057	Ptpn23
1532	9	110387997	110387997	1	-	3	CDS	ENSMUSG00000036057	Ptpn23
1533	9	110547697	110547697	1	+	5	CDS	ENSMUSG00000044791	Setd2
1534	9	110553163	110553163	1	+	3	CDS	ENSMUSG00000044791	Setd2
1535	9	110577176	110577176	1	+	3	CDS	ENSMUSG00000044791	Setd2
1536	9	114405030	114405030	1	+	3	CDS	ENSMUSG00000079260	Tmppe
1537	9	114720577	114720579	3	+	3	CDS	ENSMUSG00000032435	Dync1li1
1538	9	115254874	115254876	3	-	4	CDS	ENSMUSG00000032437	Stt3b
1539	9	115257551	115257553	3	-	4	CDS	ENSMUSG00000032437	Stt3b
1540	9	118478897	118478899	3	+	2	CDS	ENSMUSG00000032446	Eomes
1541	9	119146102	119146103	2	+	3	CDS	ENSMUSG00000038060	Dlec1
1542	9	119357640	119357647	8	+	3371	CDS	ENSMUSG00000035769	Xylb
1543	9	120574142	120574146	5	+	6	CDS	ENSMUSG00000025794	Rpl14
1544	9	124304714	124304739	26	-	13	CDS	ENSMUSG00000074829	2010315B03Rik
1545	MT	4398	4401	4	+	4	CDS	ENSMUSG00000064345	mt-Nd2
1546	MT	5778	5781	4	+	5	CDS	ENSMUSG00000064351	mt-Co1
1547	MT	6172	6172	1	+	6	CDS	ENSMUSG00000064351	mt-Co1
1548	MT	6367	6371	5	+	5	CDS	ENSMUSG00000064351	mt-Co1
1549	X	7212916	7212916	1	-	3	CDS	ENSMUSG00000004317	Clcn5
1550	X	7597726	7597726	1	-	3	CDS	ENSMUSG00000103436	Gm36995
1551	X	8086235	8086244	10	-	4	CDS	ENSMUSG00000031165	Was
1552	X	9309523	9309523	1	+	2	CDS	ENSMUSG00000015342	Xk
1553	X	13140450	13140450	1	+	4	CDS	ENSMUSG00000031010	Usp9x
1554	X	20639445	20639445	1	+	3	CDS	ENSMUSG00000031060	Rbm10
1555	X	20672287	20672287	1	+	3	CDS	ENSMUSG00000001924	Uba1
1556	X	20678614	20678614	1	+	3	CDS	ENSMUSG00000001924	Uba1
1557	X	20681477	20681477	1	+	3	CDS	ENSMUSG00000001924	Uba1
1558	X	20682166	20682166	1	+	3	CDS	ENSMUSG00000001924	Uba1
1559	X	21061991	21061991	1	-	3	CDS	ENSMUSG00000054737	Zfp182
1560	X	36037665	36037666	2	+	3	CDS	ENSMUSG00000031093	Dock11
1561	X	36795764	36795765	2	+	4	CDS	ENSMUSG00000016319	Slc25a5
1562	X	38440224	38440224	1	-	3	CDS	ENSMUSG00000016534	Lamp2
1563	X	41826059	41826059	1	-	3	CDS	ENSMUSG00000037475	Thoc2
1564	X	41844294	41844299	6	-	7	CDS	ENSMUSG00000037475	Thoc2
1565	X	41858196	41858197	2	-	6	CDS	ENSMUSG00000037475	Thoc2
1566	X	42250067	42250069	3	+	3	CDS	ENSMUSG00000025862	Stag2
1567	X	73717512	73717512	1	+	3	CDS	ENSMUSG00000031378	Abcd1
1568	X	73900148	73900149	2	-	3	CDS	ENSMUSG00000031389	Arhgap4
1569	X	73921035	73921035	1	-	3	CDS	ENSMUSG00000031389	Arhgap4
1570	X	73948115	73948115	1	-	5	CDS	ENSMUSG00000031386	Hcfc1
1571	X	74240282	74240282	1	-	3	CDS	ENSMUSG00000031328	Flna
1572	X	74257109	74257109	1	+	3	CDS	ENSMUSG00000001964	Emd
1573	X	74257139	74257162	24	+	15	CDS	ENSMUSG00000001964	Emd
1574	X	75098495	75098495	1	+	4	CDS	ENSMUSG00000031403	Dkc1
1575	X	75394365	75394365	1	+	4	CDS	ENSMUSG00000031198	Fundc2
1576	X	93420634	93420634	1	-	3	CDS	ENSMUSG00000006678	Pola1
1577	X	93561413	93561414	2	-	3	CDS	ENSMUSG00000006678	Pola1
1578	X	96166475	96166475	1	+	3	CDS	ENSMUSG00000031207	Msn
1579	X	101264872	101264875	4	-	3	CDS	ENSMUSG00000092463	Gm20489
1580	X	101284877	101284878	2	+	3	CDS	ENSMUSG00000079487	Med12
1581	X	101543993	101543993	1	+	3	CDS	ENSMUSG00000031314	Taf1
1582	X	102186536	102186537	2	-	4	CDS	ENSMUSG00000031320	Rps4x
1583	X	105874701	105874701	1	-	4	CDS	ENSMUSG00000031229	Atrx
1584	X	106930634	106930634	1	+	2	CDS	ENSMUSG00000049929	Lpar4
1585	X	106930996	106930996	1	+	2	CDS	ENSMUSG00000049929	Lpar4
1586	X	107102824	107102825	2	+	4	CDS	ENSMUSG00000050921	P2ry10
1587	X	107103373	107103376	4	+	4	CDS	ENSMUSG00000050921	P2ry10
1588	X	111450338	111450340	3	-	17	CDS	ENSMUSG00000025665	Rps6ka6
1589	X	151862705	151862707	3	+	10	CDS	ENSMUSG00000025261	Huwe1
1590	X	151916873	151916873	1	+	3	CDS	ENSMUSG00000025261	Huwe1
1591	X	151930346	151930346	1	+	3	CDS	ENSMUSG00000025261	Huwe1
1592	X	152262307	152262307	1	+	4	CDS	ENSMUSG00000025332	Kdm5c
1593	X	152297919	152297941	23	-	11	CDS	ENSMUSG00000087403	Kantr
1594	X	167307445	167307448	4	-	3	CDS	ENSMUSG00000044583	Tlr7
1595	X	167307823	167307823	1	-	3	CDS	ENSMUSG00000044583	Tlr7
1596	X	169302374	169302374	1	+	3	CDS	ENSMUSG00000031355	Arhgap6
1597	X	169312885	169312885	1	-	3	CDS	ENSMUSG00000031352	Hccs
1598	GL456212.1	128901	128902	2	-	3	3UTR	ENSMUSG00000079808	AC168977.1
1599	1	4774275	4774278	4	-	5	3UTR	ENSMUSG00000033845	Mrpl15
1600	1	4846491	4846491	1	+	3	3UTR	ENSMUSG00000104217	Gm37988
1601	1	5162376	5162403	28	+	14	3UTR	ENSMUSG00000033793	Atp6v1h
1602	1	9723569	9723571	3	-	3	3UTR	ENSMUSG00000045210	Vcpip1
1603	1	10137919	10137926	8	-	8	3UTR	ENSMUSG00000067851	Arfgef1
1604	1	10138317	10138317	1	-	3	3UTR	ENSMUSG00000067851	Arfgef1
1605	1	13564927	13564929	3	-	6	3UTR	ENSMUSG00000025935	Tram1
1606	1	13565054	13565054	1	-	3	3UTR	ENSMUSG00000025935	Tram1
1607	1	13565106	13565117	12	-	11	3UTR	ENSMUSG00000025935	Tram1
1608	1	13565242	13565251	10	-	15	3UTR	ENSMUSG00000025935	Tram1
1609	1	13566051	13566065	15	-	17	3UTR	ENSMUSG00000025935	Tram1
1610	1	13566093	13566097	5	-	15	3UTR	ENSMUSG00000025935	Tram1
1611	1	13566218	13566222	5	-	10	3UTR	ENSMUSG00000025935	Tram1
1612	1	13566250	13566267	18	-	11	3UTR	ENSMUSG00000025935	Tram1
1613	1	16345281	16345282	2	-	3	3UTR	ENSMUSG00000025920	Stau2
1614	1	16345440	16345443	4	-	2	3UTR	ENSMUSG00000025920	Stau2
1615	1	20996772	20996772	1	-	3	3UTR	ENSMUSG00000041779	Tram2
1616	1	20999680	20999681	2	-	3	3UTR	ENSMUSG00000041779	Tram2
1617	1	21000190	21000190	1	-	6	3UTR	ENSMUSG00000041779	Tram2
1618	1	21000258	21000269	12	-	8	3UTR	ENSMUSG00000041779	Tram2
1619	1	21001011	21001011	1	-	3	3UTR	ENSMUSG00000041779	Tram2
1620	1	21001071	21001072	2	-	22	3UTR	ENSMUSG00000041779	Tram2
1621	1	21001137	21001150	14	-	11	3UTR	ENSMUSG00000041779	Tram2
1622	1	21001271	21001271	1	-	3	3UTR	ENSMUSG00000041779	Tram2
1623	1	21001371	21001372	2	-	4	3UTR	ENSMUSG00000041779	Tram2
1624	1	21001421	21001422	2	-	7	3UTR	ENSMUSG00000041779	Tram2
1625	1	23368441	23368442	2	-	3	3UTR	ENSMUSG00000026158	Ogfrl1
1626	1	24763772	24763772	1	+	5	3UTR	ENSMUSG00000073725	Lmbrd1
1627	1	24765017	24765017	1	+	3	3UTR	ENSMUSG00000073725	Lmbrd1
1628	1	24765476	24765476	1	+	3	3UTR	ENSMUSG00000073725	Lmbrd1
1629	1	30803238	30803238	1	-	3	3UTR	ENSMUSG00000048874	Phf3
1630	1	33745528	33745533	6	-	3	3UTR	ENSMUSG00000042215	Bag2
1631	1	33792650	33792650	1	-	3	3UTR	ENSMUSG00000042197	Zfp451
1632	1	33796917	33796917	1	-	3	3UTR	ENSMUSG00000042197	Zfp451
1633	1	33797307	33797307	1	-	3	3UTR	ENSMUSG00000042197	Zfp451
1634	1	33798636	33798639	4	-	4	3UTR	ENSMUSG00000042197	Zfp451
1635	1	33798753	33798753	1	-	3	3UTR	ENSMUSG00000042197	Zfp451
1636	1	33800377	33800377	1	-	4	3UTR	ENSMUSG00000042197	Zfp451
1637	1	33800410	33800410	1	-	3	3UTR	ENSMUSG00000042197	Zfp451
1638	1	33800437	33800439	3	-	4	3UTR	ENSMUSG00000042197	Zfp451
1639	1	34436890	34436891	2	-	3	3UTR	ENSMUSG00000042111	Ccdc115
1640	1	34446076	34446078	3	+	3	3UTR	ENSMUSG00000026127	Imp4
1641	1	34446104	34446109	6	+	3	3UTR	ENSMUSG00000026127	Imp4
1642	1	34446560	34446562	3	+	6	3UTR	ENSMUSG00000026127	Imp4
1643	1	34446591	34446592	2	+	3	3UTR	ENSMUSG00000026127	Imp4
1644	1	34446860	34446862	3	+	5	3UTR	ENSMUSG00000026127	Imp4
1645	1	34446924	34446924	1	+	3	3UTR	ENSMUSG00000026127	Imp4
1646	1	34807826	34807826	1	+	2	3UTR	ENSMUSG00000037509	Arhgef4
1647	1	34813511	34813512	2	-	3	3UTR	ENSMUSG00000037503	Fam168b
1648	1	34816589	34816589	1	-	3	3UTR	ENSMUSG00000037503	Fam168b
1649	1	34878450	34878450	1	+	5	3UTR	ENSMUSG00000026123	Plekhb2
1650	1	36143298	36143300	3	-	4	3UTR	ENSMUSG00000037470	Uggt1
1651	1	36322019	36322019	1	+	4	3UTR	ENSMUSG00000037447	Arid5a
1652	1	36792777	36792778	2	-	3	3UTR	ENSMUSG00000026116	Tmem131
1653	1	37417327	37417328	2	-	4	3UTR	ENSMUSG00000026112	Coa5
1654	1	37418635	37418639	5	-	4	3UTR	ENSMUSG00000026112	Coa5
1655	1	37443699	37443702	4	-	3	3UTR	ENSMUSG00000026110	Mgat4a
1656	1	37985383	37985385	3	-	3	3UTR	ENSMUSG00000058407	Txndc9
1657	1	37987592	37987592	1	-	3	3UTR	ENSMUSG00000058407	Txndc9
1658	1	37987616	37987621	6	-	3	3UTR	ENSMUSG00000058407	Txndc9
1659	1	37988346	37988349	4	-	3	3UTR	ENSMUSG00000058407	Txndc9
1660	1	37988785	37988786	2	-	3	3UTR	ENSMUSG00000058407	Txndc9
1661	1	38052896	38052896	1	-	3	3UTR	ENSMUSG00000026082	Rev1
1662	1	38996607	38996607	1	+	2	3UTR	ENSMUSG00000026078	Pdcl3
1663	1	40024885	40024890	6	+	6	3UTR	ENSMUSG00000026074	Map4k4
1664	1	42699497	42699497	1	+	2	3UTR	ENSMUSG00000093436	Gm20646
1665	1	51471129	51471133	5	-	3	3UTR	ENSMUSG00000026107	Nabp1
1666	1	52159343	52159344	2	+	3	3UTR	ENSMUSG00000026104	Stat1
1667	1	52184197	52184199	3	-	3	3UTR	ENSMUSG00000026103	Gls
1668	1	52185404	52185405	2	-	3	3UTR	ENSMUSG00000026103	Gls
1669	1	52185506	52185506	1	-	3	3UTR	ENSMUSG00000026103	Gls
1670	1	52186737	52186737	1	-	3	3UTR	ENSMUSG00000026103	Gls
1671	1	52187046	52187056	11	-	8	3UTR	ENSMUSG00000026103	Gls
1672	1	53755642	53755644	3	-	3	3UTR	ENSMUSG00000026094	Stk17b
1673	1	53756084	53756086	3	-	3	3UTR	ENSMUSG00000026094	Stk17b
1674	1	53756189	53756190	2	-	5	3UTR	ENSMUSG00000026094	Stk17b
1675	1	53756586	53756586	1	-	4	3UTR	ENSMUSG00000026094	Stk17b
1676	1	54645742	54645743	2	-	3	3UTR	ENSMUSG00000052331	Ankrd44
1677	1	54645945	54645993	49	-	21	3UTR	ENSMUSG00000052331	Ankrd44
1678	1	54647745	54647767	23	-	14	3UTR	ENSMUSG00000052331	Ankrd44
1679	1	54647787	54647807	21	-	6	3UTR	ENSMUSG00000052331	Ankrd44
1680	1	54647862	54647862	1	-	3	3UTR	ENSMUSG00000052331	Ankrd44
1681	1	54647893	54647893	1	-	4	3UTR	ENSMUSG00000052331	Ankrd44
1682	1	54649315	54649315	1	-	4	3UTR	ENSMUSG00000052331	Ankrd44
1683	1	54985325	54985325	1	-	4	3UTR	ENSMUSG00000025982	Sf3b1
1684	1	55202019	55202019	1	-	2	3UTR	ENSMUSG00000025978	Rftn2
1685	1	55243927	55243927	1	+	3	3UTR	ENSMUSG00000046994	Mars2
1686	1	58527113	58527113	1	-	3	3UTR	ENSMUSG00000038174	Fam126b
1687	1	58754107	58754108	2	+	3	3UTR	ENSMUSG00000026031	Cflar
1688	1	58755403	58755404	2	+	5	3UTR	ENSMUSG00000026031	Cflar
1689	1	58756388	58756389	2	+	3	3UTR	ENSMUSG00000026031	Cflar
1690	1	58756591	58756593	3	+	10	3UTR	ENSMUSG00000026031	Cflar
1691	1	58846820	58846824	5	+	3	3UTR	ENSMUSG00000026029	Casp8
1692	1	58846925	58846947	23	+	6	3UTR	ENSMUSG00000026029	Casp8
1693	1	59711550	59711551	2	+	3	3UTR	ENSMUSG00000026020	Nop58
1694	1	59716129	59716130	2	+	4	3UTR	ENSMUSG00000026020	Nop58
1695	1	59984868	59984868	1	+	4	3UTR	ENSMUSG00000041040	Fam117b
1696	1	60071227	60071229	3	-	3	3UTR	ENSMUSG00000026019	Wdr12
1697	1	60071338	60071343	6	-	3	3UTR	ENSMUSG00000026019	Wdr12
1698	1	60076275	60076276	2	-	3	3UTR	ENSMUSG00000026019	Wdr12
1699	1	60076315	60076315	1	-	3	3UTR	ENSMUSG00000026019	Wdr12
1700	1	60486039	60486039	1	-	2	3UTR	ENSMUSG00000026014	Raph1
1701	1	60487807	60487807	1	-	4	3UTR	ENSMUSG00000026014	Raph1
1702	1	60490859	60490859	1	-	2	3UTR	ENSMUSG00000026014	Raph1
1703	1	60490915	60490917	3	-	4	3UTR	ENSMUSG00000026014	Raph1
1704	1	63047936	63047938	3	-	3	3UTR	ENSMUSG00000040865	Ino80d
1705	1	63054946	63054948	3	-	4	3UTR	ENSMUSG00000040865	Ino80d
1706	1	63055651	63055652	2	-	3	3UTR	ENSMUSG00000040865	Ino80d
1707	1	63056671	63056674	4	-	6	3UTR	ENSMUSG00000040865	Ino80d
1708	1	63143722	63143723	2	-	3	3UTR	ENSMUSG00000025968	Ndufs1
1709	1	64602860	64602860	1	+	4	3UTR	ENSMUSG00000025958	Creb1
1710	1	64733814	64733814	1	-	3	3UTR	ENSMUSG00000045005	Fzd5
1711	1	65275204	65275204	1	+	3	3UTR	ENSMUSG00000025949	Pikfyve
1712	1	66719042	66719043	2	+	4	3UTR	ENSMUSG00000026005	Rpe
1713	1	71027774	71027786	13	-	6	3UTR	ENSMUSG00000026196	Bard1
1714	1	71028365	71028366	2	-	7	3UTR	ENSMUSG00000026196	Bard1
1715	1	71029634	71029635	2	-	4	3UTR	ENSMUSG00000026196	Bard1
1716	1	71579351	71579354	4	+	3	3UTR	ENSMUSG00000026192	Atic
1717	1	74268030	74268093	64	+	33	3UTR	ENSMUSG00000006304	Arpc2
1718	1	74279945	74279945	1	-	4	3UTR	ENSMUSG00000006299	Aamp
1719	1	74280120	74280122	3	-	5	3UTR	ENSMUSG00000006299	Aamp
1720	1	74288809	74288812	4	-	3	3UTR	ENSMUSG00000006301	Tmbim1
1721	1	74352857	74352859	3	+	5	3UTR	ENSMUSG00000026179	Pnkd
1722	1	74353065	74353071	7	+	3	3UTR	ENSMUSG00000026179	Pnkd
1723	1	74353543	74353543	1	+	4	3UTR	ENSMUSG00000026179	Pnkd
1724	1	74396464	74396465	2	+	4	3UTR	ENSMUSG00000026176	Ctdsp1
1725	1	74437307	74437313	7	-	7	3UTR	ENSMUSG00000033364	Usp37
1726	1	74530098	74530099	2	+	3	3UTR	ENSMUSG00000026174	Cnot9
1727	1	78669519	78669519	1	+	3	3UTR	ENSMUSG00000032883	Acsl3
1728	1	78670657	78670658	2	+	3	3UTR	ENSMUSG00000032883	Acsl3
1729	1	79608081	79608115	35	-	20	3UTR	ENSMUSG00000054702	Ap1s3
1730	1	79608233	79608236	4	-	9	3UTR	ENSMUSG00000054702	Ap1s3
1731	1	79608334	79608336	3	-	4	3UTR	ENSMUSG00000054702	Ap1s3
1732	1	79608905	79608905	1	-	3	3UTR	ENSMUSG00000054702	Ap1s3
1733	1	79705069	79705073	5	-	4	3UTR	ENSMUSG00000073643	Wdfy1
1734	1	79781378	79781378	1	+	3	3UTR	ENSMUSG00000026248	Mrpl44
1735	1	80199582	80199582	1	-	3	3UTR	ENSMUSG00000043230	Fam124b
1736	1	80501156	80501159	4	-	3	3UTR	ENSMUSG00000038608	Dock10
1737	1	80501520	80501520	1	-	3	3UTR	ENSMUSG00000038608	Dock10
1738	1	82897985	82897985	1	+	3	3UTR	ENSMUSG00000026159	Agfg1
1739	1	82899307	82899307	1	+	4	3UTR	ENSMUSG00000026159	Agfg1
1740	1	82899926	82899927	2	+	3	3UTR	ENSMUSG00000026159	Agfg1
1741	1	82900371	82900372	2	+	4	3UTR	ENSMUSG00000026159	Agfg1
1742	1	84724083	84724085	3	-	3	3UTR	ENSMUSG00000026219	Trip12
1743	1	85577212	85577246	35	-	34	3UTR	ENSMUSG00000070034	Sp110
1744	1	85577270	85577274	5	-	8	3UTR	ENSMUSG00000070034	Sp110
1745	1	85694434	85694434	1	+	3	3UTR	ENSMUSG00000026222	Sp100
1746	1	85709345	85709345	1	+	3	3UTR	ENSMUSG00000026222	Sp100
1747	1	85709634	85709652	19	+	17	3UTR	ENSMUSG00000026222	Sp100
1748	1	85709702	85709764	63	+	74	3UTR	ENSMUSG00000026222	Sp100
1749	1	85709786	85709807	22	+	25	3UTR	ENSMUSG00000026222	Sp100
1750	1	85709891	85709892	2	+	3	3UTR	ENSMUSG00000026222	Sp100
1751	1	85709949	85709950	2	+	5	3UTR	ENSMUSG00000026222	Sp100
1752	1	85717922	85717924	3	-	11	3UTR	ENSMUSG00000052760	A630001G21Rik
1753	1	85717960	85717963	4	-	4	3UTR	ENSMUSG00000052760	A630001G21Rik
1754	1	85723239	85723241	3	-	6	3UTR	ENSMUSG00000052760	A630001G21Rik
1755	1	85849799	85849813	15	+	7	3UTR	ENSMUSG00000036707	Cab39
1756	1	85849954	85849954	1	+	5	3UTR	ENSMUSG00000036707	Cab39
1757	1	85850720	85850720	1	+	4	3UTR	ENSMUSG00000036707	Cab39
1758	1	85907668	85907676	9	+	8	3UTR	ENSMUSG00000026223	Itm2c
1759	1	85907832	85907834	3	+	4	3UTR	ENSMUSG00000026223	Itm2c
1760	1	85908624	85908628	5	+	3	3UTR	ENSMUSG00000026223	Itm2c
1761	1	86345291	86345291	1	-	4	3UTR	ENSMUSG00000026234	Ncl
1762	1	86346981	86346983	3	-	6	3UTR	ENSMUSG00000026234	Ncl
1763	1	86348026	86348029	4	-	4	3UTR	ENSMUSG00000026234	Ncl
1764	1	86350564	86350594	31	-	14	3UTR	ENSMUSG00000026234	Ncl
1765	1	86530589	86530616	28	+	28	3UTR	ENSMUSG00000026238	Ptma
1766	1	87228496	87228498	3	+	7	3UTR	ENSMUSG00000026254	Eif4e2
1767	1	87449272	87449275	4	+	4	3UTR	ENSMUSG00000048000	Gigyf2
1768	1	87449501	87449503	3	+	3	3UTR	ENSMUSG00000048000	Gigyf2
1769	1	87450757	87450757	1	+	3	3UTR	ENSMUSG00000048000	Gigyf2
1770	1	87720315	87720315	1	+	3	3UTR	ENSMUSG00000026288	Inpp5d
1771	1	87942575	87942576	2	+	3	3UTR	ENSMUSG00000070738	Dgkd
1772	1	87942874	87942874	1	+	3	3UTR	ENSMUSG00000070738	Dgkd
1773	1	87943541	87943542	2	+	3	3UTR	ENSMUSG00000070738	Dgkd
1774	1	87944359	87944361	3	+	6	3UTR	ENSMUSG00000070738	Dgkd
1775	1	88263591	88263595	5	-	5	3UTR	ENSMUSG00000044783	Hjurp
1776	1	88263706	88263721	16	-	12	3UTR	ENSMUSG00000044783	Hjurp
1777	1	88263772	88263776	5	-	5	3UTR	ENSMUSG00000044783	Hjurp
1778	1	88264085	88264112	28	-	28	3UTR	ENSMUSG00000044783	Hjurp
1779	1	88264134	88264136	3	-	7	3UTR	ENSMUSG00000044783	Hjurp
1780	1	88264426	88264426	1	-	5	3UTR	ENSMUSG00000044783	Hjurp
1781	1	88264786	88264809	24	-	17	3UTR	ENSMUSG00000044783	Hjurp
1782	1	88264838	88264840	3	-	5	3UTR	ENSMUSG00000044783	Hjurp
1783	1	88264880	88264894	15	-	42	3UTR	ENSMUSG00000044783	Hjurp
1784	1	88264948	88264973	26	-	21	3UTR	ENSMUSG00000044783	Hjurp
1785	1	88501024	88501026	3	-	3	3UTR	ENSMUSG00000062310	Glrp1
1786	1	91555325	91555325	1	+	4	3UTR	ENSMUSG00000026311	Asb1
1787	1	93371510	93371510	1	+	4	3UTR	ENSMUSG00000026275	Ppp1r7
1788	1	93507914	93507923	10	+	6	3UTR	ENSMUSG00000112508	NA
1789	1	93508011	93508012	2	+	3	3UTR	ENSMUSG00000112508	NA
1790	1	93508897	93508899	3	+	4	3UTR	ENSMUSG00000112508	NA
1791	1	93509679	93509679	1	+	3	3UTR	ENSMUSG00000112508	NA
1792	1	93851565	93851566	2	+	3	3UTR	ENSMUSG00000073609	D2hgdh
1793	1	95334234	95334237	4	+	3	3UTR	ENSMUSG00000051185	Fam174a
1794	1	95590173	95590176	4	-	3	3UTR	ENSMUSG00000040710	St8sia4
1795	1	95591142	95591145	4	-	4	3UTR	ENSMUSG00000040710	St8sia4
1796	1	95619242	95619246	5	-	8	3UTR	ENSMUSG00000040710	St8sia4
1797	1	95620093	95620093	1	-	3	3UTR	ENSMUSG00000040710	St8sia4
1798	1	95620158	95620180	23	-	12	3UTR	ENSMUSG00000040710	St8sia4
1799	1	95620373	95620374	2	-	4	3UTR	ENSMUSG00000040710	St8sia4
1800	1	95620403	95620417	15	-	14	3UTR	ENSMUSG00000040710	St8sia4
1801	1	95620450	95620450	1	-	4	3UTR	ENSMUSG00000040710	St8sia4
1802	1	95621099	95621100	2	-	6	3UTR	ENSMUSG00000040710	St8sia4
1803	1	95621273	95621289	17	-	10	3UTR	ENSMUSG00000040710	St8sia4
1804	1	95621670	95621670	1	-	3	3UTR	ENSMUSG00000040710	St8sia4
1805	1	95622190	95622191	2	-	3	3UTR	ENSMUSG00000040710	St8sia4
1806	1	95623739	95623741	3	-	3	3UTR	ENSMUSG00000040710	St8sia4
1807	1	95624671	95624671	1	-	3	3UTR	ENSMUSG00000040710	St8sia4
1808	1	95625032	95625032	1	-	3	3UTR	ENSMUSG00000040710	St8sia4
1809	1	95625983	95625984	2	-	3	3UTR	ENSMUSG00000040710	St8sia4
1810	1	95626196	95626197	2	-	4	3UTR	ENSMUSG00000040710	St8sia4
1811	1	97612294	97612294	1	-	3	3UTR	ENSMUSG00000044768	D1Ertd622e
1812	1	105519375	105519375	1	-	4	3UTR	ENSMUSG00000056536	Pign
1813	1	105753941	105753941	1	+	3	3UTR	ENSMUSG00000026319	2310035C23Rik
1814	1	105845123	105845123	1	+	2	3UTR	ENSMUSG00000026321	Tnfrsf11a
1815	1	106032479	106032480	2	+	3	3UTR	ENSMUSG00000038866	Zcchc2
1816	1	106032561	106032562	2	+	4	3UTR	ENSMUSG00000038866	Zcchc2
1817	1	106539930	106539931	2	-	3	3UTR	ENSMUSG00000057329	Bcl2
1818	1	106711366	106711366	1	-	4	3UTR	ENSMUSG00000057329	Bcl2
1819	1	118300501	118300501	1	-	3	3UTR	ENSMUSG00000026374	Tsn
1820	1	118300652	118300652	1	-	3	3UTR	ENSMUSG00000026374	Tsn
1821	1	119470932	119470936	5	-	3	3UTR	ENSMUSG00000004451	Ralb
1822	1	119528214	119528215	2	+	3	3UTR	ENSMUSG00000098923	Tmem185b
1823	1	120113399	120113400	2	-	6	3UTR	ENSMUSG00000026385	Dbi
1824	1	125392964	125392967	4	-	3	3UTR	ENSMUSG00000026341	Actr3
1825	1	125393549	125393549	1	-	3	3UTR	ENSMUSG00000026341	Actr3
1826	1	127483025	127483025	1	+	3	3UTR	ENSMUSG00000036155	Mgat5
1827	1	127804910	127804911	2	+	5	3UTR	ENSMUSG00000026349	Ccnt2
1828	1	127806356	127806357	2	+	3	3UTR	ENSMUSG00000026349	Ccnt2
1829	1	128188326	128188327	2	+	3	3UTR	ENSMUSG00000056211	R3hdm1
1830	1	128188606	128188606	1	+	3	3UTR	ENSMUSG00000056211	R3hdm1
1831	1	128277500	128277500	1	+	4	3UTR	ENSMUSG00000026353	Ubxn4
1832	1	128331645	128331646	2	-	6	3UTR	ENSMUSG00000026355	Mcm6
1833	1	128331700	128331705	6	-	6	3UTR	ENSMUSG00000026355	Mcm6
1834	1	128331751	128331752	2	-	3	3UTR	ENSMUSG00000026355	Mcm6
1835	1	128331775	128331776	2	-	3	3UTR	ENSMUSG00000026355	Mcm6
1836	1	128588590	128588591	2	-	4	3UTR	ENSMUSG00000045382	Cxcr4
1837	1	131053745	131053747	3	-	4	3UTR	ENSMUSG00000016528	Mapkapk2
1838	1	131054796	131054818	23	-	15	3UTR	ENSMUSG00000016528	Mapkapk2
1839	1	131176478	131176480	3	-	5	3UTR	ENSMUSG00000026430	Rassf5
1840	1	131287279	131287282	4	-	10	3UTR	ENSMUSG00000026425	Srgap2
1841	1	131288545	131288546	2	-	4	3UTR	ENSMUSG00000026425	Srgap2
1842	1	131295291	131295292	2	-	3	3UTR	ENSMUSG00000026425	Srgap2
1843	1	131295705	131295708	4	-	6	3UTR	ENSMUSG00000026425	Srgap2
1844	1	131847200	131847201	2	+	3	3UTR	ENSMUSG00000013275	Slc41a1
1845	1	131847630	131847630	1	+	3	3UTR	ENSMUSG00000013275	Slc41a1
1846	1	131931262	131931265	4	+	3	3UTR	ENSMUSG00000026434	Nucks1
1847	1	131931290	131931291	2	+	3	3UTR	ENSMUSG00000026434	Nucks1
1848	1	131931323	131931355	33	+	29	3UTR	ENSMUSG00000026434	Nucks1
1849	1	131931419	131931419	1	+	3	3UTR	ENSMUSG00000026434	Nucks1
1850	1	131931636	131931640	5	+	9	3UTR	ENSMUSG00000026434	Nucks1
1851	1	131931854	131931861	8	+	11	3UTR	ENSMUSG00000026434	Nucks1
1852	1	131932105	131932110	6	+	6	3UTR	ENSMUSG00000026434	Nucks1
1853	1	131932447	131932447	1	+	3	3UTR	ENSMUSG00000026434	Nucks1
1854	1	131932525	131932570	46	+	35	3UTR	ENSMUSG00000026434	Nucks1
1855	1	131932607	131932609	3	+	5	3UTR	ENSMUSG00000026434	Nucks1
1856	1	131932758	131932773	16	+	8	3UTR	ENSMUSG00000026434	Nucks1
1857	1	131932818	131932835	18	+	9	3UTR	ENSMUSG00000026434	Nucks1
1858	1	131932894	131932922	29	+	12	3UTR	ENSMUSG00000026434	Nucks1
1859	1	131933253	131933274	22	+	11	3UTR	ENSMUSG00000026434	Nucks1
1860	1	131933330	131933363	34	+	11	3UTR	ENSMUSG00000026434	Nucks1
1861	1	131933402	131933406	5	+	3	3UTR	ENSMUSG00000026434	Nucks1
1862	1	131933527	131933528	2	+	6	3UTR	ENSMUSG00000026434	Nucks1
1863	1	131933565	131933566	2	+	3	3UTR	ENSMUSG00000026434	Nucks1
1864	1	131933720	131933754	35	+	54	3UTR	ENSMUSG00000026434	Nucks1
1865	1	131933796	131933801	6	+	6	3UTR	ENSMUSG00000026434	Nucks1
1866	1	131933871	131933874	4	+	4	3UTR	ENSMUSG00000026434	Nucks1
1867	1	131933995	131933997	3	+	3	3UTR	ENSMUSG00000026434	Nucks1
1868	1	131934105	131934105	1	+	3	3UTR	ENSMUSG00000026434	Nucks1
1869	1	131934236	131934241	6	+	12	3UTR	ENSMUSG00000026434	Nucks1
1870	1	131934625	131934625	1	+	7	3UTR	ENSMUSG00000026434	Nucks1
1871	1	131934882	131934893	12	+	9	3UTR	ENSMUSG00000026434	Nucks1
1872	1	131934959	131934972	14	+	15	3UTR	ENSMUSG00000026434	Nucks1
1873	1	131935021	131935021	1	+	3	3UTR	ENSMUSG00000026434	Nucks1
1874	1	131935062	131935063	2	+	3	3UTR	ENSMUSG00000026434	Nucks1
1875	1	131935412	131935439	28	+	34	3UTR	ENSMUSG00000026434	Nucks1
1876	1	131935466	131935467	2	+	3	3UTR	ENSMUSG00000026434	Nucks1
1877	1	131935535	131935547	13	+	11	3UTR	ENSMUSG00000026434	Nucks1
1878	1	131935604	131935608	5	+	10	3UTR	ENSMUSG00000026434	Nucks1
1879	1	131935665	131935666	2	+	5	3UTR	ENSMUSG00000026434	Nucks1
1880	1	131935735	131935736	2	+	4	3UTR	ENSMUSG00000026434	Nucks1
1881	1	131935864	131935889	26	+	7	3UTR	ENSMUSG00000026434	Nucks1
1882	1	131936101	131936125	25	+	17	3UTR	ENSMUSG00000026434	Nucks1
1883	1	131936195	131936206	12	+	40	3UTR	ENSMUSG00000026434	Nucks1
1884	1	132504204	132504204	1	+	5	3UTR	ENSMUSG00000026439	Rbbp5
1885	1	132504445	132504446	2	+	3	3UTR	ENSMUSG00000026439	Rbbp5
1886	1	132504918	132504918	1	+	3	3UTR	ENSMUSG00000026439	Rbbp5
1887	1	132505449	132505451	3	+	3	3UTR	ENSMUSG00000026439	Rbbp5
1888	1	132986327	132986327	1	-	5	3UTR	ENSMUSG00000054387	Mdm4
1889	1	132986533	132986537	5	-	3	3UTR	ENSMUSG00000054387	Mdm4
1890	1	132986722	132986723	2	-	5	3UTR	ENSMUSG00000054387	Mdm4
1891	1	132987296	132987296	1	-	3	3UTR	ENSMUSG00000054387	Mdm4
1892	1	132987551	132987552	2	-	3	3UTR	ENSMUSG00000054387	Mdm4
1893	1	132987722	132987723	2	-	3	3UTR	ENSMUSG00000054387	Mdm4
1894	1	132988325	132988334	10	-	7	3UTR	ENSMUSG00000054387	Mdm4
1895	1	132988391	132988415	25	-	14	3UTR	ENSMUSG00000054387	Mdm4
1896	1	132988495	132988496	2	-	3	3UTR	ENSMUSG00000054387	Mdm4
1897	1	132988871	132988873	3	-	3	3UTR	ENSMUSG00000054387	Mdm4
1898	1	132988919	132988919	1	-	3	3UTR	ENSMUSG00000054387	Mdm4
1899	1	132988965	132988968	4	-	3	3UTR	ENSMUSG00000054387	Mdm4
1900	1	132989047	132989074	28	-	22	3UTR	ENSMUSG00000054387	Mdm4
1901	1	132989944	132989945	2	-	5	3UTR	ENSMUSG00000054387	Mdm4
1902	1	132990466	132990467	2	-	4	3UTR	ENSMUSG00000054387	Mdm4
1903	1	133107240	133107253	14	+	8	3UTR	ENSMUSG00000026447	Pik3c2b
1904	1	133107417	133107427	11	+	16	3UTR	ENSMUSG00000026447	Pik3c2b
1905	1	133107530	133107566	37	+	39	3UTR	ENSMUSG00000026447	Pik3c2b
1906	1	133107784	133107818	35	+	15	3UTR	ENSMUSG00000026447	Pik3c2b
1907	1	133139657	133139674	18	+	22	3UTR	ENSMUSG00000046062	Ppp1r15b
1908	1	133139741	133139743	3	+	4	3UTR	ENSMUSG00000046062	Ppp1r15b
1909	1	133620030	133620030	1	-	3	3UTR	ENSMUSG00000102976	Zc3h11a
1910	1	134075542	134075563	22	-	18	3UTR	ENSMUSG00000020423	Btg2
1911	1	134075701	134075702	2	-	4	3UTR	ENSMUSG00000020423	Btg2
1912	1	134075832	134075833	2	-	5	3UTR	ENSMUSG00000020423	Btg2
1913	1	134075877	134075878	2	-	4	3UTR	ENSMUSG00000020423	Btg2
1914	1	134076638	134076643	6	-	6	3UTR	ENSMUSG00000020423	Btg2
1915	1	134076713	134076717	5	-	4	3UTR	ENSMUSG00000020423	Btg2
1916	1	134076857	134076867	11	-	9	3UTR	ENSMUSG00000020423	Btg2
1917	1	134630855	134630857	3	+	4	3UTR	ENSMUSG00000042207	Kdm5b
1918	1	134759782	134759783	2	-	4	3UTR	ENSMUSG00000073557	Ppp1r12b
1919	1	135155497	135155497	1	+	3	3UTR	ENSMUSG00000026426	Arl8a
1920	1	135155642	135155652	11	+	8	3UTR	ENSMUSG00000026426	Arl8a
1921	1	135156114	135156116	3	+	3	3UTR	ENSMUSG00000026426	Arl8a
1922	1	135301726	135301732	7	-	3	3UTR	ENSMUSG00000062580	Timm17a
1923	1	135385042	135385052	11	-	13	3UTR	ENSMUSG00000041879	Ipo9
1924	1	135385285	135385288	4	-	8	3UTR	ENSMUSG00000041879	Ipo9
1925	1	135751260	135751261	2	+	3	3UTR	ENSMUSG00000026421	Csrp1
1926	1	136174883	136174884	2	+	3	3UTR	ENSMUSG00000041642	Kif21b
1927	1	136175232	136175236	5	+	6	3UTR	ENSMUSG00000041642	Kif21b
1928	1	136177267	136177268	2	+	6	3UTR	ENSMUSG00000041642	Kif21b
1929	1	136629368	136629368	1	+	4	3UTR	ENSMUSG00000041483	Zfp281
1930	1	138063844	138063848	5	-	4	3UTR	ENSMUSG00000026395	Ptprc
1931	1	138064173	138064173	1	-	4	3UTR	ENSMUSG00000026395	Ptprc
1932	1	138064205	138064205	1	-	4	3UTR	ENSMUSG00000026395	Ptprc
1933	1	138484275	138484276	2	-	3	3UTR	ENSMUSG00000026393	Nek7
1934	1	139171422	139171422	1	+	3	3UTR	ENSMUSG00000056268	Dennd1b
1935	1	139172046	139172048	3	+	3	3UTR	ENSMUSG00000056268	Dennd1b
1936	1	139174955	139174956	2	+	3	3UTR	ENSMUSG00000056268	Dennd1b
1937	1	139175003	139175005	3	+	4	3UTR	ENSMUSG00000056268	Dennd1b
1938	1	143602860	143602860	1	-	4	3UTR	ENSMUSG00000026361	Cdc73
1939	1	143605580	143605580	1	-	3	3UTR	ENSMUSG00000026361	Cdc73
1940	1	143606345	143606348	4	-	4	3UTR	ENSMUSG00000026361	Cdc73
1941	1	143606414	143606417	4	-	3	3UTR	ENSMUSG00000026361	Cdc73
1942	1	143607359	143607361	3	-	4	3UTR	ENSMUSG00000026361	Cdc73
1943	1	143608134	143608134	1	-	3	3UTR	ENSMUSG00000026361	Cdc73
1944	1	151821372	151821373	2	+	8	3UTR	ENSMUSG00000043019	Edem3
1945	1	152774421	152774449	29	+	19	3UTR	ENSMUSG00000008475	Arpc5
1946	1	152774536	152774537	2	+	3	3UTR	ENSMUSG00000008475	Arpc5
1947	1	152836181	152836181	1	+	3	3UTR	ENSMUSG00000026480	Ncf2
1948	1	152839020	152839020	1	-	3	3UTR	ENSMUSG00000042772	Smg7
1949	1	152839054	152839056	3	-	4	3UTR	ENSMUSG00000042772	Smg7
1950	1	153220296	153220297	2	-	4	3UTR	ENSMUSG00000026478	Lamc1
1951	1	153455819	153455823	5	-	3	3UTR	ENSMUSG00000042699	Dhx9
1952	1	153455843	153455859	17	-	9	3UTR	ENSMUSG00000042699	Dhx9
1953	1	153762746	153762750	5	+	3	3UTR	ENSMUSG00000066800	Rnasel
1954	1	153908355	153908361	7	+	5	3UTR	ENSMUSG00000026473	Glul
1955	1	154393229	154393232	4	-	4	3UTR	ENSMUSG00000004110	Cacna1e
1956	1	154396560	154396563	4	-	3	3UTR	ENSMUSG00000004110	Cacna1e
1957	1	155097563	155097566	4	-	3	3UTR	ENSMUSG00000056708	Ier5
1958	1	155845506	155845506	1	-	3	3UTR	ENSMUSG00000033671	Cep350
1959	1	155846985	155847001	17	-	7	3UTR	ENSMUSG00000033671	Cep350
1960	1	156018281	156018281	1	-	3	3UTR	ENSMUSG00000026466	Tor1aip1
1961	1	156066574	156066596	23	+	8	3UTR	ENSMUSG00000050565	Tor1aip2
1962	1	156255389	156255389	1	-	2	3UTR	ENSMUSG00000060985	Tdrd5
1963	1	156366463	156366465	3	+	4	3UTR	ENSMUSG00000078193	Gm2000
1964	1	156427674	156427675	2	-	3	3UTR	ENSMUSG00000026600	Soat1
1965	1	156429908	156429911	4	-	6	3UTR	ENSMUSG00000026600	Soat1
1966	1	156429991	156429991	1	-	3	3UTR	ENSMUSG00000026600	Soat1
1967	1	156430542	156430545	4	-	3	3UTR	ENSMUSG00000026600	Soat1
1968	1	156647188	156647188	1	+	3	3UTR	ENSMUSG00000026596	Abl2
1969	1	156647332	156647333	2	+	3	3UTR	ENSMUSG00000026596	Abl2
1970	1	156647386	156647387	2	+	4	3UTR	ENSMUSG00000026596	Abl2
1971	1	156648193	156648196	4	+	3	3UTR	ENSMUSG00000026596	Abl2
1972	1	156649466	156649467	2	+	4	3UTR	ENSMUSG00000026596	Abl2
1973	1	156679121	156679122	2	-	3	3UTR	ENSMUSG00000033557	Fam20b
1974	1	156813129	156813130	2	-	3	3UTR	ENSMUSG00000026594	Ralgps2
1975	1	156816777	156816780	4	-	4	3UTR	ENSMUSG00000026594	Ralgps2
1976	1	156817710	156817712	3	-	4	3UTR	ENSMUSG00000026594	Ralgps2
1977	1	160220503	160220503	1	-	3	3UTR	ENSMUSG00000026721	Rabgap1l
1978	1	160221260	160221267	8	-	7	3UTR	ENSMUSG00000026721	Rabgap1l
1979	1	160221293	160221296	4	-	5	3UTR	ENSMUSG00000026721	Rabgap1l
1980	1	160221848	160221849	2	-	3	3UTR	ENSMUSG00000026721	Rabgap1l
1981	1	160672480	160672480	1	-	3	3UTR	ENSMUSG00000026721	Rabgap1l
1982	1	160672549	160672553	5	-	4	3UTR	ENSMUSG00000026721	Rabgap1l
1983	1	160971371	160971374	4	+	4	3UTR	ENSMUSG00000040423	Rc3h1
1984	1	160971679	160971679	1	+	4	3UTR	ENSMUSG00000040423	Rc3h1
1985	1	160972019	160972021	3	+	3	3UTR	ENSMUSG00000040423	Rc3h1
1986	1	160972119	160972122	4	+	5	3UTR	ENSMUSG00000040423	Rc3h1
1987	1	161019466	161019466	1	-	4	3UTR	ENSMUSG00000043467	Zbtb37
1988	1	161086441	161086441	1	+	3	3UTR	ENSMUSG00000026708	Cenpl
1989	1	162672153	162672155	3	-	3	3UTR	ENSMUSG00000040225	Prrc2c
1990	1	162672436	162672436	1	-	3	3UTR	ENSMUSG00000040225	Prrc2c
1991	1	162672482	162672482	1	-	3	3UTR	ENSMUSG00000040225	Prrc2c
1992	1	162672595	162672595	1	-	3	3UTR	ENSMUSG00000040225	Prrc2c
1993	1	163916242	163916242	1	+	2	3UTR	ENSMUSG00000026585	Kifap3
1994	1	164079936	164079937	2	+	3	3UTR	ENSMUSG00000026581	Sell
1995	1	164079989	164079991	3	+	7	3UTR	ENSMUSG00000026581	Sell
1996	1	164080361	164080384	24	+	11	3UTR	ENSMUSG00000026581	Sell
1997	1	164080502	164080504	3	+	5	3UTR	ENSMUSG00000026581	Sell
1998	1	164080534	164080540	7	+	9	3UTR	ENSMUSG00000026581	Sell
1999	1	164080570	164080596	27	+	20	3UTR	ENSMUSG00000026581	Sell
[truncated: 98,000 more rows]
